# Supplementary material for: Transcriptome profiling of brain myeloid cells revealed activation of Itgal, Trem1, and Spp1 in western diet-induced obesity
Source: J Neuroinflammation. 2019 Aug 19;16:169. doi: 10.1186/s12974-019-1527-z (PMC6700800; doi:10.1186/s12974-019-1527-z)
Supplement: Supplementary file 4 — Gene list comparing the transcriptomes of CD11b+CD45hi from CD-fed mice and WD-fed mice. The positive FC value means the gene expression CD11b+CD45hi is larger in WD-fed mice than that in CD-fed mice and vice versa. DE genes were defined as FDR < 0.05. (XLSX 1730 kb) [file 12974_2019_1527_MOESM4_ESM.xlsx]

## Sheet: newlate_diet_v2_a4_WDvsChow.hi.
Additional file 4. Gene list comparing the transcriptomes of CD11b+CD45hi cells from CD-fed and WD-fed mice (DE genes were defined as FDR<0.05)
genes	Symbol	Entrezid	Genename	logFC	logCPM	F	PValue	FDR	FC
ENSMUSG00000091264	Smim13	108934	small integral membrane protein 13	3.38901	5.65103	38.298	3.26237e-06	0.0145997	10.476
ENSMUSG00000000171	Sdhd	66925	succinate dehydrogenase complex, subunit D, integral membrane protein	1.73182	6.30476	38.188	3.32977e-06	0.0145997	3.32146
ENSMUSG00000030685	Kctd13	233877	potassium channel tetramerisation domain containing 13	-3.69552	4.00962	35.9487	5.09199e-06	0.0145997	-12.9557
ENSMUSG00000022536	Glyr1	74022	glyoxylate reductase 1 homolog (Arabidopsis)	-2.04206	5.50266	35.8104	5.2303e-06	0.0145997	-4.11833
ENSMUSG00000042138	Msantd2	235184	Myb/SANT-like DNA-binding domain containing 2	-3.80442	4.47105	35.6406	5.40569e-06	0.0145997	-13.9716
ENSMUSG00000024151	Msh2	17685	mutS homolog 2	-2.41276	5.05534	34.1637	7.23313e-06	0.0154282	-5.32494
ENSMUSG00000027905	Ddx20	53975	DEAD (Asp-Glu-Ala-Asp) box polypeptide 20	-3.34322	4.61858	33.6635	7.99743e-06	0.0154282	-10.1487
ENSMUSG00000047409	Ctdspl	69274	CTD (carboxy-terminal domain, RNA polymerase II, polypeptide A) small phosphatase-like	4.22739	3.10434	32.4897	1.01613e-05	0.0156772	18.7314
ENSMUSG00000060950	Trmt61a	328162	tRNA methyltransferase 61A	-5.88079	4.84154	32.3548	1.04483e-05	0.0156772	-58.9242
ENSMUSG00000006442	Srm	20810	spermidine synthase	-5.25842	3.75515	30.8575	1.43061e-05	0.0187362	-38.2774
ENSMUSG00000024277	Mapre2	212307	microtubule-associated protein, RP/EB family, member 2	-1.26929	7.70281	30.3853	1.58272e-05	0.0187362	-2.41043
ENSMUSG00000023094	Msrb2	76467	methionine sulfoxide reductase B2	-2.9931	4.38473	29.8512	1.77639e-05	0.0187362	-7.96185
ENSMUSG00000027775	Mfsd1	66868	major facilitator superfamily domain containing 1	0.913636	7.75961	29.5881	1.88119e-05	0.0187362	1.88379
ENSMUSG00000030604	Zfp626	71163	zinc finger protein 626	-7.02005	2.50098	29.4417	1.94244e-05	0.0187362	-129.791
ENSMUSG00000044037	Als2cl	235633	ALS2 C-terminal like	-5.21167	2.35859	29.0114	2.1354e-05	0.0192243	-37.0568
ENSMUSG00000097276	4930525G20Rik	320163	RIKEN cDNA 4930525G20 gene	-8.97791	2.65615	28.2548	2.93626e-05	0.024782	-504.219
ENSMUSG00000033948	Zswim5	74464	zinc finger SWIM-type containing 5	-5.5098	3.7268	27.0153	3.35108e-05	0.0261509	-45.5631
ENSMUSG00000007891	Ctsd	13033	cathepsin D	0.472633	12.3569	26.8447	3.48575e-05	0.0261509	1.38764
ENSMUSG00000026926	Pmpca	66865	peptidase (mitochondrial processing) alpha	-1.62178	6.17587	26.1246	4.12333e-05	0.0266667	-3.07755
ENSMUSG00000026740	Dnajc1	13418	DnaJ heat shock protein family (Hsp40) member C1	1.43098	6.8801	26.0788	4.16797e-05	0.0266667	2.6963
ENSMUSG00000035642	Aamdc	66273	adipogenesis associated Mth938 domain containing	-6.40341	2.7253	26.0436	4.20263e-05	0.0266667	-84.6486
ENSMUSG00000001569	Nom1	433864	nucleolar protein with MIF4G domain 1	-2.51776	4.75051	25.903	4.3444e-05	0.0266667	-5.72691
ENSMUSG00000040055	Gjb6	14623	gap junction protein, beta 6	7.98473	2.14889	24.9401	5.46753e-05	0.0319833	253.305
ENSMUSG00000024943	Smc5	226026	structural maintenance of chromosomes 5	1.63071	6.27378	24.6761	5.82843e-05	0.0319833	3.09665
ENSMUSG00000003949	Hlf	217082	hepatic leukemia factor	-2.37953	5.2353	24.6112	5.92108e-05	0.0319833	-5.20369
ENSMUSG00000049436	Upk1b	22268	uroplakin 1B	-1.31238	6.69317	24.2824	6.41606e-05	0.0330648	-2.48351
ENSMUSG00000028069	Gpatch4	66614	G patch domain containing 4	-4.56851	2.84078	24.1212	6.67503e-05	0.0330648	-23.7279
ENSMUSG00000053007	Creb5	231991	cAMP responsive element binding protein 5	-2.76766	4.00221	24.0127	6.85585e-05	0.0330648	-6.81003
ENSMUSG00000094441	Zfp955a	77652	zinc finger protein 955A	-3.59757	3.56358	23.854	7.12989e-05	0.0332007	-12.1053
ENSMUSG00000035150	Eif2s3x	26905	eukaryotic translation initiation factor 2, subunit 3, structural gene X-linked	1.41331	6.53315	23.5948	7.60375e-05	0.034227	2.66347
ENSMUSG00000020021	Fgd6	13998	FYVE, RhoGEF and PH domain containing 6	-2.83569	5.03436	23.0088	8.80719e-05	0.0383653	-7.13886
ENSMUSG00000024037	Wdr4	57773	WD repeat domain 4	-3.5178	3.7215	22.6484	9.65002e-05	0.0396159	-11.4542
ENSMUSG00000013646	Sh3bp5l	79566	SH3 binding domain protein 5 like	-4.45624	3.28208	22.6358	9.68102e-05	0.0396159	-21.9513
ENSMUSG00000039313	Minar1	209743	membrane integral NOTCH2 associated receptor 1	-6.1772	2.11903	22.4653	0.000101116	0.040161	-72.3639
ENSMUSG00000027598	Itch	16396	itchy, E3 ubiquitin protein ligase	0.67788	8.28069	21.8096	0.000119742	0.0462	1.59979
ENSMUSG00000030486	Zfp108	54678	zinc finger protein 108	4.7004	2.39789	21.247	0.000138733	0.0485466	25.9993
ENSMUSG00000031157	Pqbp1	54633	polyglutamine binding protein 1	-2.91909	4.08986	21.2336	0.000139227	0.0485466	-7.56367
ENSMUSG00000020787	P2rx1	18436	purinergic receptor P2X, ligand-gated ion channel, 1	-8.69841	2.1575	22.0206	0.000142914	0.0485466	-415.415
ENSMUSG00000039202	Abhd2	54608	abhydrolase domain containing 2	0.913876	7.61575	21.1121	0.000143763	0.0485466	1.8841
ENSMUSG00000060548	Tnfrsf19	29820	tumor necrosis factor receptor superfamily, member 19	10.3966	2.01633	23.0607	0.000146562	0.0485466	1348.02
ENSMUSG00000004451	Ralb	64143	v-ral simian leukemia viral oncogene B	-1.27552	6.55074	20.9044	0.000151902	0.0485466	-2.42087
ENSMUSG00000020333	Acsl6	216739	acyl-CoA synthetase long-chain family member 6	5.9547	2.57335	21.2729	0.000153446	0.0485466	62.0217
ENSMUSG00000053801	Grwd1	101612	glutamate-rich WD repeat containing 1	-7.43226	2.11961	20.7528	0.000158162	0.0485466	-172.716
ENSMUSG00000035851	Ythdc1	231386	YTH domain containing 1	-0.954262	7.95828	20.469	0.00017065	0.0485466	-1.93759
ENSMUSG00000052572	Dlg2	23859	discs large MAGUK scaffold protein 2	10.1376	2.60508	20.4163	0.000173087	0.0485466	1126.45
ENSMUSG00000078671	Chd2	244059	chromodomain helicase DNA binding protein 2	-0.845127	7.89929	20.3898	0.000174326	0.0485466	-1.79642
ENSMUSG00000040506	Ambra1	228361	autophagy/beclin 1 regulator 1	-1.58789	6.26709	20.316	0.000177826	0.0485466	-3.0061
ENSMUSG00000022024	Sugt1	67955	SGT1, suppressor of G2 allele of SKP1 (S. cerevisiae)	-1.82466	4.98704	20.1233	0.00018734	0.0485466	-3.54225
ENSMUSG00000028587	Orc1	18392	origin recognition complex, subunit 1	5.96819	3.01915	20.1146	0.000187786	0.0485466	62.6041
ENSMUSG00000052406	Rexo4	227656	REX4, 3'-5' exonuclease	2.63721	5.44864	20.1021	0.000188423	0.0485466	6.22129
ENSMUSG00000015377	Dennd6b	69440	DENN/MADD domain containing 6B	-4.1249	2.85658	20.0515	0.000191029	0.0485466	-17.4469
ENSMUSG00000039556	Ppp1r3f	54646	protein phosphatase 1, regulatory subunit 3F	-3.59446	2.94917	20.0259	0.00019236	0.0485466	-12.0793
ENSMUSG00000022807	Osbpl11	106326	oxysterol binding protein-like 11	-0.821013	7.36305	19.9654	0.000195551	0.0485466	-1.76665
ENSMUSG00000027223	Mapk8ip1	19099	mitogen-activated protein kinase 8 interacting protein 1	7.44197	0.306976	21.7752	0.000196931	0.0485466	173.883
ENSMUSG00000062040	Zfp27	22689	zinc finger protein 27	-4.79321	3.16547	19.768	0.000206378	0.0485466	-27.7268
ENSMUSG00000079184	Mphosph8	75339	M-phase phosphoprotein 8	1.74047	5.7581	19.7607	0.00020679	0.0485466	3.34143
ENSMUSG00000031302	Nlgn3	245537	neuroligin 3	9.50099	3.01794	19.711	0.000209628	0.0485466	724.574
ENSMUSG00000037266	Rsrp1	27981	arginine/serine rich protein 1	0.772191	8.68683	19.6797	0.000211431	0.0485466	1.70786
ENSMUSG00000022098	Bmp1	12153	bone morphogenetic protein 1	6.59313	1.53862	19.5942	0.000216452	0.0485466	96.5449
ENSMUSG00000096727	Psmb9	16912	proteasome (prosome, macropain) subunit, beta type 9 (large multifunctional peptidase 2)	1.22937	6.79586	19.5516	0.000219009	0.0485466	2.34465
ENSMUSG00000060244	Alyref2	56009	Aly/REF export factor 2	-7.26183	1.71137	19.5214	0.000220833	0.0485466	-153.472
ENSMUSG00000026228	Htr2b	15559	5-hydroxytryptamine (serotonin) receptor 2B	-7.63984	2.31565	19.4753	0.000223656	0.0485466	-199.444
ENSMUSG00000029864	Gstk1	76263	glutathione S-transferase kappa 1	5.45861	2.80907	18.9546	0.000258445	0.0485466	43.9749
ENSMUSG00000026404	Ddx59	67997	DEAD (Asp-Glu-Ala-Asp) box polypeptide 59	-7.11	2.91751	18.9402	0.000259492	0.0485466	-138.141
ENSMUSG00000055069	Rab39	270160	RAB39, member RAS oncogene family	-2.04287	5.86138	18.9303	0.000260206	0.0485466	-4.12064
ENSMUSG00000032411	Tfdp2	211586	transcription factor Dp 2	-2.79049	4.80799	18.9176	0.000261139	0.0485466	-6.91863
ENSMUSG00000022842	Ece2	107522	endothelin converting enzyme 2	-8.67653	1.89158	19.5958	0.000264551	0.0485466	-409.163
ENSMUSG00000070425	Xntrpc	102443351	Xndc1-transient receptor potential cation channel, subfamily C, member 2 readthrough	2.74842	4.49704	18.8701	0.000264636	0.0485466	6.7198
ENSMUSG00000026791	Slc2a8	56017	solute carrier family 2, (facilitated glucose transporter), member 8	-3.99484	3.48838	18.8655	0.000264976	0.0485466	-15.9429
ENSMUSG00000025656	Arhgef9	236915	CDC42 guanine nucleotide exchange factor (GEF) 9	7.66533	2.28099	18.8527	0.000265922	0.0485466	202.999
ENSMUSG00000025939	Ube2w	66799	ubiquitin-conjugating enzyme E2W (putative)	-2.04835	4.38865	18.8072	0.000269341	0.0485466	-4.13632
ENSMUSG00000021366	Hivep1	110521	human immunodeficiency virus type I enhancer binding protein 1	-1.08653	6.91748	18.7741	0.000271855	0.0485466	-2.12363
ENSMUSG00000043683	Fem1a	14154	feminization 1 homolog a (C. elegans)	1.72283	5.96591	18.7215	0.000275903	0.0485466	3.30083
ENSMUSG00000047146	Tet1	52463	tet methylcytosine dioxygenase 1	-2.45714	5.38861	18.7077	0.00027698	0.0485466	-5.49127
ENSMUSG00000025588	Nat1	17960	N-acetyl transferase 1	7.30694	1.63479	18.6888	0.000278458	0.0485466	158.346
ENSMUSG00000031826	Usp10	22224	ubiquitin specific peptidase 10	1.86661	5.37319	18.6216	0.00028378	0.0485466	3.64674
ENSMUSG00000020827	Mink1	50932	misshapen-like kinase 1 (zebrafish)	1.35612	5.5127	18.62	0.000283911	0.0485466	2.55996
ENSMUSG00000005374	Tbl2	27368	transducin (beta)-like 2	1.55626	5.47141	18.6048	0.000285128	0.0485466	2.9409
ENSMUSG00000028700	Pomgnt1	68273	protein O-linked mannose beta 1,2-N-acetylglucosaminyltransferase	-2.81278	3.94969	18.4621	0.000296871	0.0485466	-7.02636
ENSMUSG00000020689	Itgb3	16416	integrin beta 3	-1.17012	7.21245	18.4594	0.000297098	0.0485466	-2.25031
ENSMUSG00000022132	Cldn10	58187	claudin 10	9.7752	1.05607	20.0567	0.000297121	0.0485466	876.25
ENSMUSG00000027273	Snap25	20614	synaptosomal-associated protein 25	-5.95742	3.46723	18.4239	0.0003001	0.0485466	-62.1388
ENSMUSG00000030779	Rbbp6	19647	retinoblastoma binding protein 6, ubiquitin ligase	0.778853	8.19573	18.4095	0.000301332	0.0485466	1.71577
ENSMUSG00000028273	Pdlim5	56376	PDZ and LIM domain 5	-1.13373	6.96173	18.4019	0.000301978	0.0485466	-2.19425
ENSMUSG00000028614	Ndc1	72787	NDC1 transmembrane nucleoporin	-2.99117	3.65296	18.3263	0.000308537	0.0489618	-7.95119
ENSMUSG00000052302	Tbc1d30	74694	TBC1 domain family, member 30	5.3928	3.26173	18.2891	0.000311812	0.0489618	42.0141
ENSMUSG00000038697	Taf5l	102162	TATA-box binding protein associated factor 5 like	-2.42311	3.9307	18.1825	0.000321434	0.0498924	-5.36325
ENSMUSG00000051390	Zbtb22	81630	zinc finger and BTB domain containing 22	-5.81634	2.57115	18.1308	0.00032622	0.05006	-56.3499
ENSMUSG00000072082	Ccnf	12449	cyclin F	-8.41221	0.713609	18.7327	0.000332661	0.0504229	-340.664
ENSMUSG00000025034	Trim8	93679	tripartite motif-containing 8	-1.13502	6.02458	18.027	0.000336053	0.0504229	-2.19621
ENSMUSG00000021996	Esd	13885	esterase D/formylglutathione hydrolase	1.85815	4.60911	17.8381	0.000354802	0.0521497	3.62544
ENSMUSG00000028339	Col15a1	12819	collagen, type XV, alpha 1	-1.92091	5.21692	17.8126	0.000357427	0.0521497	-3.78663
ENSMUSG00000052144	Ppp4r2	232314	protein phosphatase 4, regulatory subunit 2	1.35516	7.26056	17.792	0.000359552	0.0521497	2.55826
ENSMUSG00000028961	Pgd	110208	phosphogluconate dehydrogenase	-0.841123	6.89051	17.7589	0.000363009	0.0521497	-1.79144
ENSMUSG00000007603	Dus3l	224907	dihydrouridine synthase 3-like (S. cerevisiae)	2.09665	4.38325	17.6737	0.000372062	0.0526852	4.27714
ENSMUSG00000026587	Astn1	11899	astrotactin 1	7.06408	1.22958	17.6338	0.000376384	0.0526852	133.814
ENSMUSG00000025176	Hoga1	67432	4-hydroxy-2-oxoglutarate aldolase 1	-5.62098	2.73976	17.615	0.000378441	0.0526852	-49.2133
ENSMUSG00000046111	Cep295	319675	centrosomal protein 295	-1.43719	6.66709	17.5505	0.000385591	0.0530314	-2.70794
ENSMUSG00000021969	Zdhhc20	75965	zinc finger, DHHC domain containing 20	0.805907	7.43498	17.513	0.000389813	0.0530314	1.74824
ENSMUSG00000025959	Klf7	93691	Kruppel-like factor 7 (ubiquitous)	-1.7668	7.36933	17.4876	0.000392709	0.0530314	-3.40298
ENSMUSG00000032026	Rexo2	104444	RNA exonuclease 2	2.26406	5.48523	17.4259	0.000399827	0.0534581	4.80342
ENSMUSG00000039096	Rsad1	237926	radical S-adenosyl methionine domain containing 1	-4.05296	3.30786	17.3731	0.000406034	0.0537557	-16.5983
ENSMUSG00000038156	Spon1	233744	spondin 1, (f-spondin) extracellular matrix protein	-10.0016	2.02699	18.2888	0.000415359	0.0544564	-1025.17
ENSMUSG00000028988	Ctnnbip1	67087	catenin beta interacting protein 1	-3.38751	2.92549	17.143	0.00043434	0.0554846	-10.4651
ENSMUSG00000035199	Arl6ip5	65106	ADP-ribosylation factor-like 6 interacting protein 5	-2.41833	4.01252	17.1147	0.000437968	0.0554846	-5.3455
ENSMUSG00000030495	Slc7a10	53896	solute carrier family 7 (cationic amino acid transporter, y+ system), member 10	9.38553	0.813035	18.4413	0.000445582	0.0554846	668.847
ENSMUSG00000073413	Ly6g6d	114654	lymphocyte antigen 6 complex, locus G6D	8.41204	0.025458	18.4232	0.000447655	0.0554846	340.626
ENSMUSG00000031671	Setd6	66083	SET domain containing 6	2.79897	4.63065	17.0403	0.000447667	0.0554846	6.95946
ENSMUSG00000044456	Rin3	217835	Ras and Rab interactor 3	-0.950378	6.97993	17.0232	0.000449922	0.0554846	-1.93238
ENSMUSG00000025141	Myadml2	68515	myeloid-associated differentiation marker-like 2	-8.69651	1.54915	17.9423	0.00045556	0.0554846	-414.868
ENSMUSG00000027550	Lrrcc1	71710	leucine rich repeat and coiled-coil domain containing 1	-1.30588	5.84587	16.9772	0.000456072	0.0554846	-2.47235
ENSMUSG00000047554	Tmem41b	233724	transmembrane protein 41B	1.799	5.62152	16.9222	0.000463546	0.0558143	3.47979
ENSMUSG00000040613	Apobec1	11810	apolipoprotein B mRNA editing enzyme, catalytic polypeptide 1	0.725525	7.79197	16.8967	0.000467048	0.0558143	1.6535
ENSMUSG00000029086	Prom1	19126	prominin 1	7.2881	1.08443	17.0617	0.000482747	0.0571843	156.292
ENSMUSG00000053286	Trmt1l	98685	tRNA methyltransferase 1 like	-1.35243	6.01298	16.7393	0.000489371	0.057465	-2.55342
ENSMUSG00000052137	Rbm12b2	77604	RNA binding motif protein 12 B2	-1.77393	5.59652	16.653	0.000502094	0.0584142	-3.41984
ENSMUSG00000019864	Rtn4ip1	170728	reticulon 4 interacting protein 1	3.21914	3.99633	16.6263	0.000506106	0.0584142	9.31233
ENSMUSG00000020857	Nme2	18103	NME/NM23 nucleoside diphosphate kinase 2	1.41096	4.71604	16.5361	0.000519923	0.0587909	2.65914
ENSMUSG00000006586	Runx1t1	12395	RUNX1 translocation partner 1	7.00061	3.0355	16.5359	0.000519951	0.0587909	128.054
ENSMUSG00000025277	Abhd6	66082	abhydrolase domain containing 6	1.66047	4.91464	16.5063	0.000524576	0.0587909	3.1612
ENSMUSG00000042942	Greb1l	381157	growth regulation by estrogen in breast cancer-like	9.08489	0.972119	17.3857	0.000529472	0.0587909	543.032
ENSMUSG00000057421	Las1l	76130	LAS1-like (S. cerevisiae)	-2.18031	4.79194	16.4533	0.000532968	0.0587909	-4.53251
ENSMUSG00000087259	2610035D17Rik	72386	RIKEN cDNA 2610035D17 gene	6.17109	1.83786	16.4214	0.000538091	0.0587909	72.0583
ENSMUSG00000027371	Fahd2a	68126	fumarylacetoacetate hydrolase domain containing 2A	-7.49839	0.551047	16.974	0.000540038	0.0587909	-180.817
ENSMUSG00000052488	Cherp	27967	calcium homeostasis endoplasmic reticulum protein	-1.09001	5.83454	16.3612	0.000547901	0.0587909	-2.12875
ENSMUSG00000022434	Fam118a	73225	family with sequence similarity 118, member A	-3.25777	2.60537	16.3572	0.000548552	0.0587909	-9.56506
ENSMUSG00000022247	Brix1	67832	BRX1, biogenesis of ribosomes	-1.94262	4.57586	16.3162	0.000555353	0.0589667	-3.84403
ENSMUSG00000040268	Plekha1	101476	pleckstrin homology domain containing, family A (phosphoinositide binding specific) member 1	0.962067	7.69522	16.2949	0.000558926	0.0589667	1.9481
ENSMUSG00000021607	Mrpl36	94066	mitochondrial ribosomal protein L36	3.15932	3.78646	16.2454	0.000567328	0.0590691	8.93407
ENSMUSG00000005873	Reep5	13476	receptor accessory protein 5	0.77604	7.5017	16.2377	0.000568645	0.0590691	1.71242
ENSMUSG00000020246	Hcfc2	67933	host cell factor C2	1.77384	5.50878	16.1959	0.000575858	0.0593617	3.41963
ENSMUSG00000029070	Mxra8	74761	matrix-remodelling associated 8	10.2029	1.58838	17.3795	0.000587876	0.0598165	1178.66
ENSMUSG00000091764	Zfp964	636741	zinc finger protein 964	6.75607	2.38358	16.0924	0.000594165	0.0598165	108.088
ENSMUSG00000020321	Mdh1	17449	malate dehydrogenase 1, NAD (soluble)	1.10353	6.2362	16.0901	0.000594586	0.0598165	2.1488
ENSMUSG00000039182	AW209491	105351	expressed sequence AW209491	-7.09787	2.66275	16.0699	0.000598223	0.0598165	-136.985
ENSMUSG00000020516	Rps6kb1	72508	ribosomal protein S6 kinase, polypeptide 1	-0.849317	6.70923	16.0469	0.000602417	0.0598165	-1.80165
ENSMUSG00000024251	Thada	240174	thyroid adenoma associated	-1.08266	6.33092	15.9535	0.000619747	0.060687	-2.11794
ENSMUSG00000041264	Uspl1	231915	ubiquitin specific peptidase like 1	1.87081	5.92229	15.9512	0.000620172	0.060687	3.65739
ENSMUSG00000007338	Mrpl49	18120	mitochondrial ribosomal protein L49	1.82115	4.27494	15.879	0.000633962	0.0614418	3.53364
ENSMUSG00000002076	Hsf2bp	74377	heat shock transcription factor 2 binding protein	-8.57009	2.0826	16.3949	0.000636986	0.0614418	-380.062
ENSMUSG00000021952	Xpo4	57258	exportin 4	1.83791	5.27596	15.7199	0.000665517	0.0637386	3.57491
ENSMUSG00000046556	Zfp319	79233	zinc finger protein 319	-2.99506	3.22357	15.6558	0.000678724	0.0645457	-7.97266
ENSMUSG00000030982	Vps35l	71517	VPS35 endosomal protein sorting factor like	1.1613	6.4607	15.5934	0.000691845	0.0653334	2.23659
ENSMUSG00000000326	Comt	12846	catechol-O-methyltransferase	0.851567	7.08218	15.5556	0.000699945	0.0656393	1.80446
ENSMUSG00000028199	Cryz	12972	crystallin, zeta	3.33086	3.86771	15.4561	0.000721719	0.0672144	10.0621
ENSMUSG00000029298	Gbp9	236573	guanylate-binding protein 9	1.31357	6.11807	15.4313	0.000727273	0.0672678	2.48556
ENSMUSG00000031562	Dctd	320685	dCMP deaminase	-9.13782	1.98982	15.8928	0.000736761	0.0676818	-563.323
ENSMUSG00000023055	Calcoco1	67488	calcium binding and coiled coil domain 1	-1.59965	5.19706	15.3226	0.000752141	0.0680185	-3.03069
ENSMUSG00000018427	Ypel2	77864	yippee like 2	-2.57226	5.05586	15.3144	0.000754056	0.0680185	-5.9474
ENSMUSG00000030216	Wbp11	60321	WW domain binding protein 11	1.42713	5.65213	15.3081	0.000755537	0.0680185	2.68912
ENSMUSG00000036913	Trim67	330863	tripartite motif-containing 67	9.29953	1.78395	15.5055	0.000764096	0.068312	630.139
ENSMUSG00000066152	Slc31a2	20530	solute carrier family 31, member 2	-1.50849	5.94201	15.2515	0.000768914	0.068312	-2.84512
ENSMUSG00000022370	Mrpl13	68537	mitochondrial ribosomal protein L13	-1.661	4.52073	15.1941	0.000782739	0.0690857	-3.16237
ENSMUSG00000020196	Cabin1	104248	calcineurin binding protein 1	-1.37326	5.97178	15.1589	0.00079136	0.069215	-2.59055
ENSMUSG00000068417	Pnp2	667034	purine-nucleoside phosphorylase 2	-7.48711	0.967008	15.6282	0.000796211	0.069215	-179.409
ENSMUSG00000044702	Palb2	233826	partner and localizer of BRCA2	-3.27629	3.35733	15.1257	0.000799581	0.069215	-9.6886
ENSMUSG00000027651	Rprd1b	70470	regulation of nuclear pre-mRNA domain containing 1B	1.71834	4.95379	15.0699	0.000813633	0.0699828	3.29058
ENSMUSG00000040841	Six5	20475	sine oculis-related homeobox 5	-6.52583	1.67686	14.9662	0.000840448	0.0718317	-92.1449
ENSMUSG00000037470	Uggt1	320011	UDP-glucose glycoprotein glucosyltransferase 1	-1.1847	7.01334	14.9131	0.000854536	0.0725765	-2.27316
ENSMUSG00000025925	Terf1	21749	telomeric repeat binding factor 1	1.76981	4.575	14.816	0.000881	0.0743564	3.4101
ENSMUSG00000064036	Mro	71263	maestro	8.93705	0.359955	15.8213	0.000897945	0.0748927	490.141
ENSMUSG00000049327	Kmt5a	67956	lysine methyltransferase 5A	1.35184	6.30159	14.7538	0.000898446	0.0748927	2.55238
ENSMUSG00000027346	Gpcpd1	74182	glycerophosphocholine phosphodiesterase 1	0.768615	7.16083	14.6924	0.000916012	0.0758885	1.70363
ENSMUSG00000026189	Pecr	111175	peroxisomal trans-2-enoyl-CoA reductase	-3.61712	3.19969	14.661	0.000925127	0.0761763	-12.2705
ENSMUSG00000040688	Tbl3	213773	transducin (beta)-like 3	1.92119	3.81007	14.6176	0.000937914	0.0764022	3.78736
ENSMUSG00000024018	Ccdc167	68597	coiled-coil domain containing 167	-3.01182	4.50734	14.5844	0.000947841	0.0764022	-8.06583
ENSMUSG00000032407	U2surp	67958	U2 snRNP-associated SURP domain containing	0.807743	8.03714	14.5824	0.000948424	0.0764022	1.75047
ENSMUSG00000036036	Zfp57	22715	zinc finger protein 57	9.07979	1.71508	15.3058	0.000950501	0.0764022	541.114
ENSMUSG00000004473	Clec11a	20256	C-type lectin domain family 11, member a	8.96824	0.895081	15.2185	0.000974968	0.0774583	500.851
ENSMUSG00000046909	Tefm	68550	transcription elongation factor, mitochondrial	-2.86391	3.9225	14.495	0.000975112	0.0774583	-7.27985
ENSMUSG00000022811	Zfp148	22661	zinc finger protein 148	0.751986	7.38636	14.4647	0.000984545	0.0776876	1.68411
ENSMUSG00000018547	Pip4k2b	108083	phosphatidylinositol-5-phosphate 4-kinase, type II, beta	-1.43838	7.12818	14.4489	0.000989505	0.0776876	-2.71017
ENSMUSG00000021794	Glud1	14661	glutamate dehydrogenase 1	-0.548122	8.57112	14.38	0.00101146	0.0789523	-1.46218
ENSMUSG00000071866	Ppia	268373	peptidylprolyl isomerase A	1.16645	5.5424	14.3588	0.00101831	0.0790301	2.24459
ENSMUSG00000020808	Pimreg	109212	PICALM interacting mitotic regulator	6.01316	-0.380757	14.2439	0.00105642	0.0815194	64.5865
ENSMUSG00000013523	Bcas1	76960	breast carcinoma amplified sequence 1	-9.9074	2.08292	14.5974	0.00108396	0.0823283	-960.34
ENSMUSG00000038685	Rtel1	269400	regulator of telomere elongation helicase 1	3.75096	3.87425	14.136	0.00109363	0.0823283	13.4633
ENSMUSG00000059796	Eif4a1	13681	eukaryotic translation initiation factor 4A1	-0.730151	7.98968	14.1308	0.00109544	0.0823283	-1.65881
ENSMUSG00000054280	Prr14l	215476	proline rich 14-like	0.762054	7.8061	14.1166	0.00110044	0.0823283	1.6959
ENSMUSG00000030226	Lmo3	109593	LIM domain only 3	11.479	2.23656	14.7932	0.00110462	0.0823283	2854.4
ENSMUSG00000031958	Ldhd	52815	lactate dehydrogenase D	6.87927	0.45401	15.0625	0.00111236	0.0823283	117.725
ENSMUSG00000019857	Asf1a	66403	anti-silencing function 1A histone chaperone	-2.02766	4.54698	14.0737	0.00111575	0.0823283	-4.07744
ENSMUSG00000018217	Pmp22	18858	peripheral myelin protein 22	0.615318	8.95257	14.0441	0.00112643	0.0823283	1.5319
ENSMUSG00000038160	Atg5	11793	autophagy related 5	1.72765	4.59085	14.0334	0.00113032	0.0823283	3.31187
ENSMUSG00000030088	Aldh1l1	107747	aldehyde dehydrogenase 1 family, member L1	7.75548	1.47419	14.7045	0.00113399	0.0823283	216.088
ENSMUSG00000005397	Nid1	18073	nidogen 1	6.05341	1.96855	14.2091	0.00113932	0.0823283	66.4137
ENSMUSG00000029171	Pgm1	66681	phosphoglucomutase 1	-3.68587	4.22009	14.0068	0.00114006	0.0823283	-12.8694
ENSMUSG00000043831	Lysmd4	75099	LysM, putative peptidoglycan-binding, domain containing 4	-4.80068	2.65816	13.9796	0.00115012	0.0823844	-27.8708
ENSMUSG00000020422	Tns3	319939	tensin 3	-0.520003	8.52445	13.9616	0.00115682	0.0823844	-1.43396
ENSMUSG00000043090	Zfp866	330788	zinc finger protein 866	-1.87048	5.90916	13.942	0.00116416	0.0823844	-3.65655
ENSMUSG00000070871	Ccnyl1	227210	cyclin Y-like 1	1.60967	5.05525	13.9391	0.00116524	0.0823844	3.05182
ENSMUSG00000003974	Grm3	108069	glutamate receptor, metabotropic 3	5.13768	2.17902	13.8698	0.00119167	0.0838112	35.2042
ENSMUSG00000007682	Dio2	13371	deiodinase, iodothyronine, type II	-6.77138	2.42537	13.8415	0.00120267	0.0838112	-109.241
ENSMUSG00000078580	E430018J23Rik	101604	RIKEN cDNA E430018J23 gene	4.68015	4.02392	13.838	0.00120404	0.0838112	25.6368
ENSMUSG00000007987	Ift22	67286	intraflagellar transport 22	3.79859	2.12228	13.7407	0.00124272	0.0853438	13.9152
ENSMUSG00000037857	Nufip2	68564	nuclear fragile X mental retardation protein interacting protein 2	0.716617	7.89322	13.735	0.00124501	0.0853438	1.64332
ENSMUSG00000028654	Mycl	16918	v-myc avian myelocytomatosis viral oncogene lung carcinoma derived	5.92498	2.0629	13.735	0.00124502	0.0853438	60.7571
ENSMUSG00000031816	Mthfsd	234814	methenyltetrahydrofolate synthetase domain containing	-4.06509	2.71949	13.6716	0.00127098	0.0866837	-16.7384
ENSMUSG00000049526	Tmem202	73893	transmembrane protein 202	8.82793	1.4453	13.5884	0.001306	0.0886242	454.435
ENSMUSG00000001228	Uhrf1	18140	ubiquitin-like, containing PHD and RING finger domains, 1	-5.89369	1.65374	13.5722	0.0013129	0.0886469	-59.4534
ENSMUSG00000032503	Arpp21	74100	cyclic AMP-regulated phosphoprotein, 21	9.08094	0.581349	14.4593	0.00132395	0.0889116	541.545
ENSMUSG00000058897	Col25a1	77018	collagen, type XXV, alpha 1	-7.6809	0.493539	14.1616	0.00133397	0.0889116	-205.202
ENSMUSG00000021367	Edn1	13614	endothelin 1	-7.82276	1.29227	13.9166	0.00133657	0.0889116	-226.404
ENSMUSG00000020872	Tac4	93670	tachykinin 4	6.96815	1.08797	13.6536	0.001359	0.0895465	125.205
ENSMUSG00000037326	Capn15	50817	calpain 15	-3.59146	2.52603	13.4565	0.00136363	0.0895465	-12.0542
ENSMUSG00000032611	1700102P08Rik	112418	RIKEN cDNA 1700102P08 gene	7.6609	0.444945	13.6012	0.00138203	0.0895465	202.376
ENSMUSG00000061723	Tnnt3	21957	troponin T3, skeletal, fast	7.49414	1.72181	14.0279	0.00138902	0.0895465	180.286
ENSMUSG00000001105	Ift20	55978	intraflagellar transport 20	-1.79779	4.87874	13.3809	0.00139795	0.0895465	-3.47687
ENSMUSG00000010095	Slc3a2	17254	solute carrier family 3 (activators of dibasic and neutral amino acid transport), member 2	-0.799508	7.66777	13.3552	0.00140984	0.0895465	-1.74051
ENSMUSG00000061778	Mospd2	76763	motile sperm domain containing 2	1.36252	5.89083	13.3476	0.00141337	0.0895465	2.57133
ENSMUSG00000022900	Ildr1	106347	immunoglobulin-like domain containing receptor 1	3.71008	2.86403	13.3419	0.00141605	0.0895465	13.0872
ENSMUSG00000019986	Ahi1	52906	Abelson helper integration site 1	4.13457	2.95033	13.3377	0.00141799	0.0895465	17.5643
ENSMUSG00000042606	Hirip3	233876	HIRA interacting protein 3	-2.72899	3.73293	13.3276	0.00142273	0.0895465	-6.62993
ENSMUSG00000026070	Il18r1	16182	interleukin 18 receptor 1	-8.86198	0.638344	13.6852	0.00143676	0.0895465	-465.289
ENSMUSG00000024299	Adamts10	224697	a disintegrin-like and metallopeptidase (reprolysin type) with thrombospondin type 1 motif, 10	-1.73877	4.62292	13.2854	0.00144269	0.0895465	-3.3375
ENSMUSG00000031442	Mcf2l	17207	mcf.2 transforming sequence-like	-8.83355	2.18539	13.4578	0.00144725	0.0895465	-456.209
ENSMUSG00000025935	Tram1	72265	translocating chain-associating membrane protein 1	0.659463	7.75859	13.2702	0.00144991	0.0895465	1.57949
ENSMUSG00000045725	Prr15	78004	proline rich 15	7.58109	-0.17853	14.1264	0.00145982	0.0895465	191.486
ENSMUSG00000021572	Cep72	74470	centrosomal protein 72	-8.82371	1.43102	13.6326	0.00146066	0.0895465	-453.108
ENSMUSG00000030243	Recql	19691	RecQ protein-like	1.77374	4.98002	13.232	0.00146836	0.0895465	3.41939
ENSMUSG00000030960	Eef1akmt2	72096	EEF1A lysine methyltransferase 2	2.66742	3.20833	13.2288	0.00146989	0.0895465	6.35293
ENSMUSG00000075569	Pms2	18861	PMS1 homolog2, mismatch repair system component	-7.95218	1.10831	13.6078	0.00147211	0.0895465	-247.653
ENSMUSG00000056486	Chn1	108699	chimerin 1	9.5877	0.942882	14.0758	0.00148177	0.0897302	769.456
ENSMUSG00000028443	Nudt2	66401	nudix (nucleoside diphosphate linked moiety X)-type motif 2	-5.86796	2.28464	13.1673	0.00150013	0.0899635	-58.4026
ENSMUSG00000029204	Rhoh	74734	ras homolog family member H	-1.31455	6.02668	13.1672	0.00150022	0.0899635	-2.48725
ENSMUSG00000045377	Tmem88	67020	transmembrane protein 88	-8.03413	1.18907	13.5363	0.00150561	0.0899635	-262.129
ENSMUSG00000090115	Usp49	224836	ubiquitin specific peptidase 49	-3.04599	5.03732	13.0982	0.00153492	0.0902101	-8.25915
ENSMUSG00000014763	Fam120b	67544	family with sequence similarity 120, member B	-0.953319	6.23143	13.092	0.0015381	0.0902101	-1.93632
ENSMUSG00000085622	3110056K07Rik	73204	RIKEN cDNA 3110056K07 gene	-4.88368	2.65945	13.0727	0.00154801	0.0902101	-29.5212
ENSMUSG00000004637	Wwox	80707	WW domain-containing oxidoreductase	-1.99739	4.67067	13.069	0.00154988	0.0902101	-3.99277
ENSMUSG00000037475	Thoc2	331401	THO complex 2	0.677935	7.37272	13.0657	0.00155158	0.0902101	1.59985
ENSMUSG00000036707	Cab39	12283	calcium binding protein 39	-0.927018	6.73078	13.0612	0.00155391	0.0902101	-1.90134
ENSMUSG00000022472	Desi1	28075	desumoylating isopeptidase 1	1.96385	4.07337	12.977	0.00159811	0.0902101	3.90102
ENSMUSG00000048279	Sacs	50720	sacsin	2.06123	4.51693	12.9733	0.0016001	0.0902101	4.17342
ENSMUSG00000025499	Hras	15461	Harvey rat sarcoma virus oncogene	-2.87288	2.95958	12.9732	0.00160013	0.0902101	-7.32524
ENSMUSG00000031754	Nudt21	68219	nudix (nucleoside diphosphate linked moiety X)-type motif 21	1.95051	4.39454	12.963	0.00160561	0.0902101	3.86512
ENSMUSG00000026162	Nhej1	75570	nonhomologous end-joining factor 1	-9.14231	1.19267	13.3238	0.00161029	0.0902101	-565.081
ENSMUSG00000033105	Lss	16987	lanosterol synthase	2.21783	4.57754	12.9283	0.0016243	0.0902101	4.65193
ENSMUSG00000024271	Elp2	58523	elongator acetyltransferase complex subunit 2	-1.53928	5.41881	12.927	0.00162503	0.0902101	-2.90649
ENSMUSG00000031028	Tub	22141	tubby bipartite transcription factor	8.28848	0.960399	13.0983	0.00162617	0.0902101	312.666
ENSMUSG00000036377	C530008M17Rik	320827	RIKEN cDNA C530008M17 gene	7.84165	0.840654	12.919	0.00162938	0.0902101	229.389
ENSMUSG00000062822	4833420G17Rik	67392	RIKEN cDNA 4833420G17 gene	-1.23305	5.55969	12.9107	0.00163388	0.0902101	-2.35064
ENSMUSG00000030750	Nsmce1	67711	NSE1 homolog, SMC5-SMC6 complex component	-5.19025	3.106	12.881	0.0016502	0.0902101	-36.5109
ENSMUSG00000015846	Rxra	20181	retinoid X receptor alpha	-0.982447	6.47196	12.8598	0.00166196	0.0902101	-1.97581
ENSMUSG00000004319	Clcn3	12725	chloride channel, voltage-sensitive 3	-0.916924	7.04787	12.8468	0.00166919	0.0902101	-1.88809
ENSMUSG00000028692	Akr1a1	58810	aldo-keto reductase family 1, member A1 (aldehyde reductase)	-0.630464	7.55263	12.8389	0.00167364	0.0902101	-1.54806
ENSMUSG00000006014	Prg4	96875	proteoglycan 4 (megakaryocyte stimulating factor, articular superficial zone protein)	-5.50267	2.56205	12.8369	0.00167474	0.0902101	-45.3386
ENSMUSG00000008658	Rbfox1	268859	RNA binding protein, fox-1 homolog (C. elegans) 1	3.4915	3.51811	12.835	0.00167579	0.0902101	11.2472
ENSMUSG00000032557	Uba5	66663	ubiquitin-like modifier activating enzyme 5	-1.39033	6.01178	12.8298	0.0016787	0.0902101	-2.62139
ENSMUSG00000026965	Anapc2	99152	anaphase promoting complex subunit 2	1.21321	5.38011	12.8255	0.00168117	0.0902101	2.31853
ENSMUSG00000004054	Map3k11	26403	mitogen-activated protein kinase kinase kinase 11	-1.22853	6.13084	12.8172	0.00168583	0.0902101	-2.34328
ENSMUSG00000071669	Snx29	74478	sorting nexin 29	-1.1532	6.15749	12.814	0.00168762	0.0902101	-2.22407
ENSMUSG00000028782	Adgrb2	230775	adhesion G protein-coupled receptor B2	8.11266	-0.193921	13.3537	0.0017082	0.0902101	276.792
ENSMUSG00000035104	Eva1a	232146	eva-1 homolog A (C. elegans)	-4.63854	2.79641	12.7747	0.00171002	0.0902101	-24.9081
ENSMUSG00000044496	2510039O18Rik	77034	RIKEN cDNA 2510039O18 gene	-1.24499	5.91662	12.7526	0.00172275	0.0902101	-2.37018
ENSMUSG00000025102	3110040N11Rik	67290	RIKEN cDNA 3110040N11 gene	4.15458	2.95652	12.7516	0.00172337	0.0902101	17.8096
ENSMUSG00000027340	Slc23a2	54338	solute carrier family 23 (nucleobase transporters), member 2	-0.635349	7.82868	12.7493	0.00172469	0.0902101	-1.55331
ENSMUSG00000021638	Ocln	18260	occludin	-8.59503	1.92816	13.0988	0.00172999	0.0902101	-386.688
ENSMUSG00000022637	Cblb	208650	Casitas B-lineage lymphoma b	0.995644	6.53981	12.7188	0.00174246	0.0902101	1.99397
ENSMUSG00000051456	Hspb3	56534	heat shock protein 3	4.25573	2.13591	12.7094	0.001748	0.0902101	19.1031
ENSMUSG00000003464	Pex19	19298	peroxisomal biogenesis factor 19	1.8784	4.92683	12.7066	0.00174965	0.0902101	3.67668
ENSMUSG00000026436	Elk4	13714	ELK4, member of ETS oncogene family	0.675559	7.33792	12.7016	0.00175255	0.0902101	1.59722
ENSMUSG00000046185	Zfp84	74352	zinc finger protein 84	-1.27254	5.80568	12.6943	0.00175691	0.0902101	-2.41586
ENSMUSG00000027406	Idh3b	170718	isocitrate dehydrogenase 3 (NAD+) beta	1.24568	6.29342	12.6585	0.00177821	0.0904776	2.37131
ENSMUSG00000025407	Gli1	14632	GLI-Kruppel family member GLI1	8.28084	0.825897	12.8211	0.00178086	0.0904776	311.016
ENSMUSG00000044595	Dnd1	213236	DND microRNA-mediated repression inhibitor 1	-8.77384	0.553811	13.006	0.00178222	0.0904776	-437.714
ENSMUSG00000029651	Mtus2	77521	microtubule associated tumor suppressor candidate 2	4.71046	1.55879	12.6322	0.00179402	0.0907357	26.1812
ENSMUSG00000045095	Magi1	14924	membrane associated guanylate kinase, WW and PDZ domain containing 1	1.49443	5.50073	12.6113	0.00180674	0.0910381	2.81753
ENSMUSG00000044566	Cage1	71213	cancer antigen 1	-7.72402	0.548516	12.9217	0.00183118	0.0915922	-211.427
ENSMUSG00000030641	Ddias	74041	DNA damage-induced apoptosis suppressor	6.66763	2.77356	12.5686	0.00183296	0.0915922	101.662
ENSMUSG00000021671	Poc5	67463	POC5 centriolar protein	2.74183	3.79014	12.5604	0.00183808	0.0915922	6.68918
ENSMUSG00000048720	Tbc1d12	209478	TBC1D12: TBC1 domain family, member 12	2.19612	3.82011	12.5385	0.00185175	0.0918391	4.58246
ENSMUSG00000030720	Cln3	12752	ceroid lipofuscinosis, neuronal 3, juvenile (Batten, Spielmeyer-Vogt disease)	0.960641	6.30337	12.5307	0.00185664	0.0918391	1.94617
ENSMUSG00000051355	Commd1	17846	COMM domain containing 1	-3.61577	2.97628	12.4933	0.00188031	0.0926704	-12.259
ENSMUSG00000030738	Eif3c	56347	eukaryotic translation initiation factor 3, subunit C	0.578987	7.5543	12.4685	0.00189616	0.0928613	1.4938
ENSMUSG00000036282	Naa30	70646	N(alpha)-acetyltransferase 30, NatC catalytic subunit	1.69076	5.26022	12.4658	0.00189793	0.0928613	3.22827
ENSMUSG00000075486	Commd6	66200	COMM domain containing 6	-1.557	4.84335	12.4416	0.00191355	0.0930535	-2.94242
ENSMUSG00000030209	Grin2b	14812	glutamate receptor, ionotropic, NMDA2B (epsilon 2)	11.4316	2.2587	12.9869	0.00191566	0.0930535	2762.28
ENSMUSG00000024191	Bnip1	224630	BCL2/adenovirus E1B interacting protein 1	2.59628	3.92629	12.3937	0.00194497	0.0930535	6.04724
ENSMUSG00000026999	Nup35	69482	nucleoporin 35	-3.69062	2.97038	12.386	0.00195007	0.0930535	-12.9118
ENSMUSG00000034652	Cd300a	217303	CD300A molecule	0.732856	7.85292	12.3805	0.00195371	0.0930535	1.66193
ENSMUSG00000018899	Irf1	16362	interferon regulatory factor 1	-1.62923	5.47033	12.3707	0.00196022	0.0930535	-3.09347
ENSMUSG00000029120	Ppp2r2c	269643	protein phosphatase 2, regulatory subunit B, gamma	3.42188	1.74485	12.3656	0.00196368	0.0930535	10.7173
ENSMUSG00000046093	Hpcal4	170638	hippocalcin-like 4	9.88105	1.01402	12.9021	0.00196749	0.0930535	942.958
ENSMUSG00000037730	Mynn	80732	myoneurin	1.21875	6.25863	12.359	0.00196808	0.0930535	2.32746
ENSMUSG00000022887	Masp1	17174	mannan-binding lectin serine peptidase 1	-8.20723	1.81549	12.6844	0.00197711	0.0930535	-295.544
ENSMUSG00000035517	Tdrd7	100121	tudor domain containing 7	-2.1391	5.56155	12.3447	0.00197766	0.0930535	-4.40487
ENSMUSG00000019214	Chtf18	214901	CTF18, chromosome transmission fidelity factor 18	-8.18008	-0.0544325	12.8663	0.00198987	0.093303	-290.035
ENSMUSG00000010392	Gosr1	53334	golgi SNAP receptor complex member 1	1.38065	5.36295	12.3162	0.00199696	0.0933114	2.60386
ENSMUSG00000097101	1810034E14Rik	66503	RIKEN cDNA 1810034E14 gene	-7.95003	0.860749	12.6358	0.00200858	0.0935307	-247.285
ENSMUSG00000037683	Armc3	70882	armadillo repeat containing 3	-7.41616	2.21982	12.6203	0.00201872	0.0935865	-170.799
ENSMUSG00000031375	Bgn	12111	biglycan	5.34071	1.17895	12.2773	0.00202364	0.0935865	40.5242
ENSMUSG00000032370	Lactb	80907	lactamase, beta	-1.41882	5.07617	12.2669	0.00203087	0.0936002	-2.67367
ENSMUSG00000038412	Higd1a	56295	HIG1 domain family, member 1A	-3.90079	3.07468	12.1932	0.00208265	0.0948524	-14.9367
ENSMUSG00000021368	Tbc1d7	67046	TBC1 domain family, member 7	-6.34471	1.17411	12.5144	0.00208961	0.0948524	-81.2735
ENSMUSG00000066880	Zfp617	170938	zinc finger protein 617	-1.53798	4.45985	12.1713	0.00209836	0.0948524	-2.90387
ENSMUSG00000024507	Hsd17b4	15488	hydroxysteroid (17-beta) dehydrogenase 4	0.79487	7.22556	12.1632	0.00210423	0.0948524	1.73492
ENSMUSG00000032050	Rdx	19684	radixin	0.739348	7.57297	12.1619	0.00210515	0.0948524	1.66942
ENSMUSG00000054293	P2ry10b	213438	purinergic receptor P2Y, G-protein coupled 10B	-1.70612	4.35546	12.1544	0.00211053	0.0948524	-3.26281
ENSMUSG00000024603	Dctn4	67665	dynactin 4	0.71632	6.96929	12.1544	0.00211054	0.0948524	1.64299
ENSMUSG00000042331	Specc1	432572	sperm antigen with calponin homology and coiled-coil domains 1	0.923344	8.48448	12.1493	0.00211423	0.0948524	1.89651
ENSMUSG00000045659	Plekha7	233765	pleckstrin homology domain containing, family A member 7	-5.42146	1.27723	12.1302	0.00212816	0.0951614	-42.8569
ENSMUSG00000073791	Efcab7	230500	EF-hand calcium binding domain 7	-8.59872	1.71892	12.4394	0.00214149	0.0951926	-387.678
ENSMUSG00000027210	Meis2	17536	Meis homeobox 2	9.50319	1.37026	12.6238	0.00214896	0.0951926	725.678
ENSMUSG00000004633	Chn2	69993	chimerin 2	1.06217	6.41862	12.1004	0.00215001	0.0951926	2.08807
ENSMUSG00000024044	Epb41l3	13823	erythrocyte membrane protein band 4.1 like 3	1.87091	5.05314	12.0732	0.00217025	0.0957746	3.65763
ENSMUSG00000020883	Fbxl20	72194	F-box and leucine-rich repeat protein 20	-1.07844	8.09388	12.0434	0.00219258	0.0961485	-2.11175
ENSMUSG00000026577	Blzf1	66352	basic leucine zipper nuclear factor 1	-3.16258	5.03078	12.0429	0.00219296	0.0961485	-8.95429
ENSMUSG00000027329	Spef1	70997	sperm flagellar 1	-9.91871	1.32883	12.5494	0.00220054	0.0961684	-967.9
ENSMUSG00000005813	Metap1	75624	methionyl aminopeptidase 1	-1.20426	5.75668	11.9798	0.00224114	0.0973098	-2.3042
ENSMUSG00000031517	Gpm6a	234267	glycoprotein m6a	3.57636	3.40363	11.9611	0.00225561	0.0973098	11.9287
ENSMUSG00000034320	Slc26a2	13521	solute carrier family 26 (sulfate transporter), member 2	0.825261	7.59931	11.9607	0.00225592	0.0973098	1.77186
ENSMUSG00000058290	Espl1	105988	extra spindle pole bodies 1, separase	-2.02713	4.13292	11.9579	0.00225817	0.0973098	-4.07594
ENSMUSG00000019301	Hsd17b1	15485	hydroxysteroid (17-beta) dehydrogenase 1	-8.20142	1.0624	12.4624	0.00226268	0.0973098	-294.357
ENSMUSG00000037400	Atp11b	76295	ATPase, class VI, type 11B	-0.800431	7.01339	11.9396	0.00227246	0.0974202	-1.74162
ENSMUSG00000019874	Fabp7	12140	fatty acid binding protein 7, brain	4.53035	3.13083	11.8789	0.00232063	0.0991702	23.1085
ENSMUSG00000028132	Tmem56	99887	transmembrane protein 56	9.26721	0.520834	12.5792	0.00233424	0.099437	616.179
ENSMUSG00000024286	Ccny	67974	cyclin Y	-0.902569	6.96903	11.8237	0.00236542	0.100449	-1.86939
ENSMUSG00000074582	Arfgef2	99371	ADP-ribosylation factor guanine nucleotide-exchange factor 2 (brefeldin A-inhibited)	-1.12427	5.77004	11.7749	0.00240585	0.101603	-2.17992
ENSMUSG00000068740	Celsr2	53883	cadherin, EGF LAG seven-pass G-type receptor 2	6.65415	1.51798	11.7521	0.00242496	0.101603	100.716
ENSMUSG00000036334	Igsf10	242050	immunoglobulin superfamily, member 10	4.3428	2.73375	11.7364	0.00243827	0.101603	20.2915
ENSMUSG00000029121	Crmp1	12933	collapsin response mediator protein 1	9.04131	0.23225	12.9559	0.00243995	0.101603	526.874
ENSMUSG00000020537	Drg2	13495	developmentally regulated GTP binding protein 2	-2.27274	3.32684	11.7341	0.00244018	0.101603	-4.83241
ENSMUSG00000021874	4933413J09Rik	71106	RIKEN cDNA 4933413J09 gene	6.61996	0.0314029	12.2223	0.00244448	0.101603	98.3572
ENSMUSG00000026955	Sapcd2	72080	suppressor APC domain containing 2	-9.47408	0.729124	14.6943	0.00244529	0.101603	-711.184
ENSMUSG00000060600	Eno3	13808	enolase 3, beta muscle	1.63213	4.55181	11.7151	0.0024564	0.101752	3.0997
ENSMUSG00000003814	Calr	12317	calreticulin	0.67584	8.58692	11.6674	0.00249756	0.102577	1.59753
ENSMUSG00000055900	Tmem69	230657	transmembrane protein 69	2.48851	3.61649	11.6631	0.00250133	0.102577	5.61197
ENSMUSG00000032383	Ppib	19035	peptidylprolyl isomerase B	0.956467	6.21795	11.6506	0.00251221	0.102577	1.94055
ENSMUSG00000045948	Mrps12	24030	mitochondrial ribosomal protein S12	3.92731	1.94356	11.6442	0.00251787	0.102577	15.2138
ENSMUSG00000023348	Trip6	22051	thyroid hormone receptor interactor 6	-2.94088	3.80142	11.637	0.00252413	0.102577	-7.67882
ENSMUSG00000041143	Tmco4	77056	transmembrane and coiled-coil domains 4	2.73051	3.33095	11.6336	0.0025272	0.102577	6.63689
ENSMUSG00000047989	Ino80c	225280	INO80 complex subunit C	1.57402	4.42446	11.631	0.00252949	0.102577	2.97734
ENSMUSG00000016386	Mpped2	77015	metallophosphoesterase domain containing 2	8.19958	1.4214	11.6157	0.00254299	0.102608	293.981
ENSMUSG00000053550	Shisa7	232813	shisa family member 7	4.69163	3.04432	11.6071	0.00255069	0.102608	25.8418
ENSMUSG00000027379	Bub1	12235	BUB1, mitotic checkpoint serine/threonine kinase	-7.17934	1.21467	11.6044	0.00255303	0.102608	-144.943
ENSMUSG00000020573	Pik3cg	30955	phosphatidylinositol-4,5-bisphosphate 3-kinase catalytic subunit gamma	0.566254	8.99784	11.5923	0.0025639	0.102677	1.48067
ENSMUSG00000089996	Tmsb15b2	100034363	thymosin beta 15b2	7.87806	-0.50655	12.0679	0.00256996	0.102677	235.251
ENSMUSG00000004383	Large1	16795	LARGE xylosyl- and glucuronyltransferase 1	-1.54932	6.9051	11.5167	0.00263263	0.104366	-2.92679
ENSMUSG00000000902	Smarcb1	20587	SWI/SNF related, matrix associated, actin dependent regulator of chromatin, subfamily b, member 1	-0.914304	5.77985	11.5133	0.00263581	0.104366	-1.88466
ENSMUSG00000038848	Ythdf1	228994	YTH N6-methyladenosine RNA binding protein 1	1.04275	5.93341	11.5128	0.00263623	0.104366	2.06016
ENSMUSG00000095440	Fignl2	668225	fidgetin-like 2	-6.14223	2.12436	11.4997	0.00264834	0.104366	-70.6308
ENSMUSG00000025010	Ccnj	240665	cyclin J	-4.50901	3.11522	11.497	0.00265088	0.104366	-22.7692
ENSMUSG00000097378	B230208H11Rik	320273	RIKEN cDNA B230208H11 gene	-4.56778	1.96463	11.4738	0.00267253	0.104681	-23.7158
ENSMUSG00000039087	Rreb1	68750	ras responsive element binding protein 1	-0.644202	7.67248	11.4719	0.00267438	0.104681	-1.56287
ENSMUSG00000068823	Csde1	229663	cold shock domain containing E1, RNA binding	0.57954	8.67736	11.4368	0.00270754	0.1051	1.49437
ENSMUSG00000024287	Thoc1	225160	THO complex 1	1.24837	5.44447	11.4362	0.00270806	0.1051	2.37573
ENSMUSG00000022840	Adcy5	224129	adenylate cyclase 5	7.4028	1.31998	11.9049	0.00271029	0.1051	169.225
ENSMUSG00000021824	Ap3m1	55946	adaptor-related protein complex 3, mu 1 subunit	-1.14626	5.94995	11.4276	0.00271624	0.1051	-2.2134
ENSMUSG00000090841	Myl6	17904	myosin, light polypeptide 6, alkali, smooth muscle and non-muscle	0.818141	6.47939	11.3996	0.0027432	0.105841	1.76313
ENSMUSG00000029775	Klhdc10	76788	kelch domain containing 10	1.0726	5.92637	11.3848	0.0027575	0.105881	2.10323
ENSMUSG00000024411	Aqp4	11829	aquaporin 4	3.60512	3.58401	11.3754	0.00276662	0.105881	12.1688
ENSMUSG00000031285	Dcx	13193	doublecortin	11.4805	2.88576	12.5222	0.00277229	0.105881	2857.52
ENSMUSG00000040152	Thbs1	21825	thrombospondin 1	-1.49911	5.76849	11.3662	0.00277561	0.105881	-2.82668
ENSMUSG00000034255	Arhgap27	544817	Rho GTPase activating protein 27	-1.03774	7.12307	11.3494	0.00279215	0.105982	-2.05302
ENSMUSG00000038982	Bloc1s5	17828	biogenesis of lysosomal organelles complex-1, subunit 5, muted	-5.27894	2.42578	11.3309	0.00281035	0.105982	-38.8256
ENSMUSG00000026638	Irf6	54139	interferon regulatory factor 6	6.62627	1.45584	11.7911	0.0028133	0.105982	98.7882
ENSMUSG00000062585	Cnr2	12802	cannabinoid receptor 2 (macrophage)	-1.47157	4.71095	11.3278	0.00281349	0.105982	-2.77323
ENSMUSG00000000384	Tbrg4	21379	transforming growth factor beta regulated gene 4	-1.21192	4.8386	11.31	0.00283116	0.105982	-2.31645
ENSMUSG00000014850	Msh3	17686	mutS homolog 3	-2.96628	2.81554	11.2983	0.00284295	0.105982	-7.8152
ENSMUSG00000041609	Bicdl1	75665	BICD family like cargo adaptor 1	8.21434	0.152339	11.7532	0.00284854	0.105982	297.005
ENSMUSG00000024581	Napg	108123	N-ethylmaleimide sensitive fusion protein attachment protein gamma	-1.30329	5.41293	11.2877	0.0028536	0.105982	-2.46792
ENSMUSG00000024789	Jak2	16452	Janus kinase 2	0.811394	6.51291	11.2847	0.00285662	0.105982	1.75491
ENSMUSG00000021583	Erap1	80898	endoplasmic reticulum aminopeptidase 1	-0.872679	6.53422	11.2837	0.00285763	0.105982	-1.83106
ENSMUSG00000003378	Grik5	14809	glutamate receptor, ionotropic, kainate 5 (gamma 2)	-6.95425	0.56312	11.5647	0.00286459	0.105982	-124.005
ENSMUSG00000021448	Shc3	20418	src homology 2 domain-containing transforming protein C3	9.98452	0.92109	11.9187	0.00287582	0.105994	1013.07
ENSMUSG00000090659	Zfp493	72958	zinc finger protein 493	-3.94341	3.09458	11.2599	0.00288172	0.105994	-15.3846
ENSMUSG00000030255	Sspn	16651	sarcospan	-7.60335	2.0931	11.5341	0.00289437	0.105994	-194.463
ENSMUSG00000021374	Nup153	218210	nucleoporin 153	-0.89656	7.52897	11.2374	0.00290478	0.105994	-1.86162
ENSMUSG00000063576	Klhdc3	71765	kelch domain containing 3	-2.14475	4.33411	11.2342	0.00290812	0.105994	-4.42214
ENSMUSG00000019832	Rab32	67844	RAB32, member RAS oncogene family	-1.00465	5.66542	11.2235	0.00291911	0.105994	-2.00646
ENSMUSG00000018347	Zkscan6	52712	zinc finger with KRAB and SCAN domains 6	-2.84099	3.36606	11.2228	0.00291987	0.105994	-7.16513
ENSMUSG00000066892	Fbxl12	30843	F-box and leucine-rich repeat protein 12	1.3869	5.18517	11.1909	0.00295299	0.106909	2.61517
ENSMUSG00000048379	Socs4	67296	suppressor of cytokine signaling 4	1.30221	6.52158	11.1751	0.00296968	0.106977	2.46606
ENSMUSG00000020740	Gga3	260302	golgi associated, gamma adaptin ear containing, ARF binding protein 3	-0.921587	6.10511	11.1675	0.00297764	0.106977	-1.8942
ENSMUSG00000022159	Rab2b	76338	RAB2B, member RAS oncogene family	1.81234	5.34302	11.1628	0.00298259	0.106977	3.51212
ENSMUSG00000018733	Pex12	103737	peroxisomal biogenesis factor 12	-3.05692	3.64384	11.1417	0.00300501	0.106977	-8.32195
ENSMUSG00000056687	Gm11696	100036768	predicted gene 11696	-2.34046	3.66132	11.1397	0.00300722	0.106977	-5.06465
ENSMUSG00000027108	Ola1	67059	Obg-like ATPase 1	1.55993	4.91573	11.137	0.00301008	0.106977	2.94839
ENSMUSG00000042734	Ttc9	69480	tetratricopeptide repeat domain 9	-5.44218	3.67612	11.1368	0.00301032	0.106977	-43.477
ENSMUSG00000038301	Snx10	71982	sorting nexin 10	1.12783	7.14142	11.1215	0.00302674	0.107175	2.18529
ENSMUSG00000079557	2019-03-02	224703	membrane-associated ring finger (C3HC4) 2	2.44113	3.8267	11.1168	0.00303176	0.107175	5.43068
ENSMUSG00000022312	Eif3h	68135	eukaryotic translation initiation factor 3, subunit H	0.830307	6.74324	11.1003	0.00304958	0.107364	1.77806
ENSMUSG00000036356	Csgalnact1	234356	chondroitin sulfate N-acetylgalactosaminyltransferase 1	5.75255	0.683835	11.2291	0.003053	0.107364	53.9127
ENSMUSG00000018451	6330403K07Rik	103712	RIKEN cDNA 6330403K07 gene	9.34047	0.881095	11.7059	0.00307926	0.107858	648.279
ENSMUSG00000021665	Hexb	15212	hexosaminidase B	0.339856	12.3279	11.0697	0.00308302	0.107858	1.26563
ENSMUSG00000049504	Proser1	212127	proline and serine rich 1	-1.06949	5.78078	11.0561	0.00309793	0.108028	-2.09869
ENSMUSG00000018750	Zbtb4	75580	zinc finger and BTB domain containing 4	0.673467	6.81858	11.0507	0.0031039	0.108028	1.5949
ENSMUSG00000050697	Prkaa1	105787	protein kinase, AMP-activated, alpha 1 catalytic subunit	-1.22274	5.96337	11.0413	0.0031143	0.108112	-2.33389
ENSMUSG00000037606	Osbpl5	79196	oxysterol binding protein-like 5	7.87747	0.571022	11.0264	0.00313094	0.108411	235.155
ENSMUSG00000031976	Urb2	382038	URB2 ribosome biogenesis 2 homolog (S. cerevisiae)	-2.65624	4.21135	11.012	0.00314701	0.108689	-6.30388
ENSMUSG00000018865	Sult4a1	29859	sulfotransferase family 4A, member 1	7.99631	-0.172283	11.6096	0.00317657	0.108698	255.346
ENSMUSG00000024537	Psmg2	107047	proteasome (prosome, macropain) assembly chaperone 2	1.84119	3.89413	10.9847	0.00317785	0.108698	3.58304
ENSMUSG00000061887	Ssbp3	72475	single-stranded DNA binding protein 3	2.12858	4.5668	10.981	0.00318209	0.108698	4.37286
ENSMUSG00000042857	Gm9776	328309	predicted gene 9776	-3.04396	3.05999	10.9789	0.00318447	0.108698	-8.24751
ENSMUSG00000040584	Abcb1a	18671	ATP-binding cassette, sub-family B (MDR/TAP), member 1A	-5.07968	1.79762	11.1023	0.00319116	0.108698	-33.817
ENSMUSG00000090083	Rnf8	58230	ring finger protein 8	-2.97125	3.29722	10.9659	0.00319928	0.108698	-7.84214
ENSMUSG00000016181	Diexf	215193	digestive organ expansion factor homolog (zebrafish)	-1.49781	5.68536	10.9567	0.00320989	0.108698	-2.82414
ENSMUSG00000021594	Srd5a1	78925	steroid 5 alpha-reductase 1	8.7515	-0.0547327	11.5757	0.00321169	0.108698	430.987
ENSMUSG00000009741	Ubp1	22221	upstream binding protein 1	-0.792239	6.91251	10.94	0.00322906	0.109013	-1.73176
ENSMUSG00000038045	Sult6b1	73671	sulfotransferase family, cytosolic, 6B, member 1	2.97339	2.40073	10.9163	0.00325664	0.109402	7.85381
ENSMUSG00000066233	Tmem42	66079	transmembrane protein 42	-9.10783	1.57552	11.1876	0.00325679	0.109402	-551.735
ENSMUSG00000030994	D7Ertd443e	71007	DNA segment, Chr 7, ERATO Doi 443, expressed	-6.70998	1.25442	11.1731	0.00327303	0.109675	-104.69
ENSMUSG00000026496	Parp1	11545	poly (ADP-ribose) polymerase family, member 1	0.788689	6.74395	10.8723	0.00330832	0.110583	1.7275
ENSMUSG00000039911	Spsb1	74646	splA/ryanodine receptor domain and SOCS box containing 1	1.02837	5.3405	10.8567	0.0033269	0.110929	2.03971
ENSMUSG00000028300	C9orf72	73205	C9orf72, member of C9orf72-SMCR8 complex	1.56372	5.35953	10.8458	0.0033399	0.111089	2.95615
ENSMUSG00000009207	Lnpk	69605	lunapark, ER junction formation factor	1.32589	5.08689	10.8301	0.00335885	0.111444	2.50688
ENSMUSG00000020037	Rfx4	71137	regulatory factor X, 4 (influences HLA class II expression)	8.32655	0.392775	11.4199	0.00337865	0.11163	321.027
ENSMUSG00000020381	Mrnip	68067	MRN complex interacting protein	-6.59777	2.07159	10.8035	0.0033911	0.11163	-96.8562
ENSMUSG00000076439	Mog	17441	myelin oligodendrocyte glycoprotein	7.07228	-0.22075	11.3992	0.00340153	0.11163	134.576
ENSMUSG00000037526	Atg14	100504663	autophagy related 14	-1.61488	4.52391	10.7933	0.0034036	0.11163	-3.06286
ENSMUSG00000032413	Rasa2	114713	RAS p21 protein activator 2	1.68946	5.47411	10.7903	0.00340726	0.11163	3.22535
ENSMUSG00000043872	Zmym1	68310	zinc finger, MYM domain containing 1	-2.63104	3.52411	10.7707	0.00343137	0.11163	-6.19473
ENSMUSG00000019899	Lama2	16773	laminin, alpha 2	8.35326	0.768841	11.3712	0.00343275	0.11163	327.025
ENSMUSG00000047604	Frat2	212398	frequently rearranged in advanced T cell lymphomas 2	-5.38429	2.40035	10.7551	0.00345072	0.11163	-41.7669
ENSMUSG00000050240	Hic2	58180	hypermethylated in cancer 2	-3.38044	2.96571	10.7529	0.00345339	0.11163	-10.4139
ENSMUSG00000050334	C130071C03Rik	320203	RIKEN cDNA C130071C03 gene	7.13705	0.305462	10.865	0.00346878	0.11163	140.755
ENSMUSG00000004394	Tmed4	103694	transmembrane p24 trafficking protein 4	1.03667	5.8818	10.7397	0.00346985	0.11163	2.05149
ENSMUSG00000032482	Cspg5	29873	chondroitin sulfate proteoglycan 5	-7.73777	1.78965	10.7379	0.00347212	0.11163	-213.452
ENSMUSG00000018239	Zcchc10	67966	zinc finger, CCHC domain containing 10	-4.77192	1.8121	10.7358	0.00347481	0.11163	-27.3206
ENSMUSG00000040048	Ndufb10	68342	NADH:ubiquinone oxidoreductase subunit B10	1.45414	4.28454	10.7315	0.00348018	0.11163	2.73992
ENSMUSG00000042476	Abcb4	18670	ATP-binding cassette, sub-family B (MDR/TAP), member 4	-2.84764	4.01317	10.7221	0.00349191	0.111741	-7.19822
ENSMUSG00000009079	Ewsr1	14030	Ewing sarcoma breakpoint region 1	0.531644	8.33805	10.7	0.0035199	0.112146	1.44558
ENSMUSG00000001918	Slc1a5	20514	solute carrier family 1 (neutral amino acid transporter), member 5	-2.38825	2.95054	10.699	0.00352116	0.112146	-5.23522
ENSMUSG00000035726	Supt16	114741	suppressor of Ty 16	0.765058	7.29177	10.684	0.00354026	0.112323	1.69944
ENSMUSG00000019578	Ubxn6	66530	UBX domain protein 6	1.61219	5.31248	10.6816	0.00354335	0.112323	3.05715
ENSMUSG00000021130	Galnt16	108760	polypeptide N-acetylgalactosaminyltransferase 16	-8.44083	0.718991	10.9268	0.00356292	0.112678	-347.49
ENSMUSG00000020973	Dnaaf2	109065	dynein, axonemal assembly factor 2	-3.46482	3.00588	10.6565	0.00357563	0.112816	-11.0412
ENSMUSG00000025889	Snca	20617	synuclein, alpha	9.02103	0.13528	11.2141	0.0036142	0.113767	519.518
ENSMUSG00000087331	1810021B22Rik	69120	RIKEN cDNA 1810021B22 gene	-6.15403	0.194319	10.8753	0.00362705	0.113906	-71.211
ENSMUSG00000034110	Kctd7	212919	potassium channel tetramerisation domain containing 7	-5.56693	1.35287	10.6051	0.00364276	0.113936	-47.4038
ENSMUSG00000029376	Mthfd2l	665563	methylenetetrahydrofolate dehydrogenase (NADP+ dependent) 2-like	6.17776	0.913916	11.0144	0.00364488	0.113936	72.3922
ENSMUSG00000031983	2310022B05Rik	69551	RIKEN cDNA 2310022B05 gene	2.23567	3.44859	10.5683	0.00369169	0.114675	4.70982
ENSMUSG00000019761	Krt10	16661	keratin 10	6.59303	-0.404181	10.976	0.00369269	0.114675	96.5386
ENSMUSG00000038482	Tfdp1	21781	transcription factor Dp 1	2.15177	3.74642	10.5585	0.00370477	0.114675	4.44374
ENSMUSG00000018470	Kcnab3	16499	potassium voltage-gated channel, shaker-related subfamily, beta member 3	-8.14726	1.05451	10.8088	0.00371179	0.114675	-283.511
ENSMUSG00000046675	Tmem251	320351	transmembrane protein 251	-1.97531	4.65952	10.549	0.00371761	0.114675	-3.93213
ENSMUSG00000029246	Ppat	231327	phosphoribosyl pyrophosphate amidotransferase	-1.66215	4.24727	10.5476	0.00371946	0.114675	-3.16488
ENSMUSG00000018651	Tada2a	217031	transcriptional adaptor 2A	2.86529	2.95072	10.5359	0.00373536	0.114796	7.28681
ENSMUSG00000073968	Trim68	101700	tripartite motif-containing 68	-3.74511	2.70403	10.5161	0.00376235	0.114796	-13.4088
ENSMUSG00000068551	Zfp467	68910	zinc finger protein 467	-1.6535	5.45507	10.5073	0.00377433	0.114796	-3.14596
ENSMUSG00000078908	Mon1b	270096	MON1 homolog B, secretory traffciking associated	-1.34444	5.05197	10.505	0.00377753	0.114796	-2.53931
ENSMUSG00000097251	5033417F24Rik	75995	RIKEN cDNA 5033417F24 gene	7.45846	-0.27482	11.0645	0.003797	0.114796	175.881
ENSMUSG00000062270	Morf4l1	21761	mortality factor 4 like 1	0.54887	7.77004	10.4861	0.00380355	0.114796	1.46294
ENSMUSG00000034951	Cog7	233824	component of oligomeric golgi complex 7	-3.32755	2.99588	10.4801	0.00381194	0.114796	-10.0391
ENSMUSG00000035910	Dcdc2a	195208	doublecortin domain containing 2a	9.37345	0.704912	11.0343	0.00383512	0.114796	663.269
ENSMUSG00000020092	Pald1	27355	phosphatase domain containing, paladin 1	-0.809644	7.07749	10.4611	0.00383838	0.114796	-1.75278
ENSMUSG00000021198	Unc79	217843	unc-79 homolog	-6.2887	2.30655	10.7102	0.00384154	0.114796	-78.1785
ENSMUSG00000026596	Abl2	11352	v-abl Abelson murine leukemia viral oncogene 2 (arg, Abelson-related gene)	0.875729	6.38413	10.4579	0.00384282	0.114796	1.83494
ENSMUSG00000021514	Zfp369	170936	zinc finger protein 369	-1.43098	5.52163	10.4577	0.0038431	0.114796	-2.6963
ENSMUSG00000049305	Ccdc71	72454	coiled-coil domain containing 71	-2.74385	3.96458	10.4551	0.0038467	0.114796	-6.69857
ENSMUSG00000035671	Zswim4	212168	zinc finger SWIM-type containing 4	-1.77367	4.29176	10.453	0.00384967	0.114796	-3.41923
ENSMUSG00000022543	4930451G09Rik	74684	RIKEN cDNA 4930451G09 gene	-8.23018	0.458301	10.8525	0.00385092	0.114796	-300.283
ENSMUSG00000050377	Il31ra	218624	interleukin 31 receptor A	6.91765	1.20513	10.5546	0.00387303	0.115201	120.898
ENSMUSG00000021109	Hif1a	15251	hypoxia inducible factor 1, alpha subunit	0.742679	7.16147	10.4212	0.00389457	0.115588	1.67328
ENSMUSG00000034656	Cacna1a	12286	calcium channel, voltage-dependent, P/Q type, alpha 1A subunit	2.1238	4.17861	10.408	0.00391335	0.115736	4.35841
ENSMUSG00000090100	Ttbk2	140810	tau tubulin kinase 2	1.23432	6.13478	10.4056	0.00391682	0.115736	2.35271
ENSMUSG00000038696	Mapkap1	227743	mitogen-activated protein kinase associated protein 1	0.874672	6.10846	10.3996	0.00392529	0.115736	1.83359
ENSMUSG00000041747	Utp15	105372	UTP15 small subunit processome component	1.17936	5.35849	10.3863	0.00394441	0.115894	2.26476
ENSMUSG00000032477	Cdc25a	12530	cell division cycle 25A	-3.42243	3.21814	10.384	0.00394781	0.115894	-10.7215
ENSMUSG00000044164	Rnf182	328234	ring finger protein 182	9.36375	0.472181	10.9156	0.00398926	0.116675	658.823
ENSMUSG00000029141	Slc4a1ap	20534	solute carrier family 4 (anion exchanger), member 1, adaptor protein	-1.68479	5.32657	10.3502	0.00399689	0.116675	-3.21494
ENSMUSG00000030970	Ctbp2	13017	C-terminal binding protein 2	-1.33912	5.17719	10.3433	0.00400687	0.116675	-2.52998
ENSMUSG00000006299	Aamp	227290	angio-associated migratory protein	1.64546	4.55308	10.3361	0.00401748	0.116675	3.12848
ENSMUSG00000052214	Opa3	403187	optic atrophy 3	-2.14812	4.19469	10.336	0.00401762	0.116675	-4.4325
ENSMUSG00000085828	Gm15612	100038356	predicted gene 15612	-6.81778	2.33668	10.3257	0.00403286	0.116866	-112.813
ENSMUSG00000024534	Sncaip	67847	synuclein, alpha interacting protein (synphilin)	2.01267	5.21605	10.3102	0.00405571	0.117169	4.03529
ENSMUSG00000055447	Cd47	16423	CD47 antigen (Rh-related antigen, integrin-associated signal transducer)	0.522127	8.77607	10.2987	0.00407285	0.117169	1.43607
ENSMUSG00000003452	Bicd1	12121	BICD cargo adaptor 1	7.65559	0.314162	10.6796	0.00408535	0.117169	201.634
ENSMUSG00000029862	Clcn1	12723	chloride channel, voltage-sensitive 1	8.31518	-0.59866	12.1632	0.00408641	0.117169	318.506
ENSMUSG00000028096	Gpr89	67549	G protein-coupled receptor 89	1.45339	5.0033	10.288	0.00408884	0.117169	2.7385
ENSMUSG00000036225	Kctd1	106931	potassium channel tetramerisation domain containing 1	6.21979	0.769079	10.2793	0.00410189	0.117169	74.5321
ENSMUSG00000039568	Ubald1	207740	UBA-like domain containing 1	-1.22808	5.20004	10.2726	0.00411209	0.117169	-2.34256
ENSMUSG00000036879	Phkb	102093	phosphorylase kinase beta	-1.27174	6.01481	10.267	0.00412048	0.117169	-2.41453
ENSMUSG00000037260	Hgsnat	52120	heparan-alpha-glucosaminide N-acetyltransferase	-1.11955	5.74583	10.2609	0.00412967	0.117169	-2.1728
ENSMUSG00000034009	Rxfp1	381489	relaxin/insulin-like family peptide receptor 1	-8.12743	2.80277	10.4994	0.00413606	0.117169	-279.641
ENSMUSG00000000399	Ndufa9	66108	NADH:ubiquinone oxidoreductase subunit A9	-1.35979	5.82444	10.2549	0.00413874	0.117169	-2.56647
ENSMUSG00000025086	Trub1	72133	TruB pseudouridine (psi) synthase family member 1	2.14571	5.32619	10.2242	0.00418567	0.117622	4.4251
ENSMUSG00000060771	Tsga10	211484	testis specific 10	1.11375	5.99541	10.2231	0.00418749	0.117622	2.16407
ENSMUSG00000041923	Nol4	319211	nucleolar protein 4	9.68199	0.89511	10.6065	0.00418917	0.117622	821.426
ENSMUSG00000026749	Nek6	59126	NIMA (never in mitosis gene a)-related expressed kinase 6	0.825661	7.33226	10.2217	0.00418958	0.117622	1.77235
ENSMUSG00000058022	Adtrp	109254	androgen dependent TFPI regulating protein	-5.38954	2.09513	10.2047	0.00421577	0.118108	-41.9194
ENSMUSG00000039110	Mycbpap	104601	MYCBP associated protein	7.63649	0.452755	10.7368	0.00423477	0.118108	198.982
ENSMUSG00000050394	Armcx6	278097	armadillo repeat containing, X-linked 6	6.80047	0.0776852	10.5656	0.00424854	0.118108	111.467
ENSMUSG00000048040	Arxes2	76976	adipocyte-related X-chromosome expressed sequence 2	6.4467	-0.813536	10.7211	0.00425715	0.118108	87.2269
ENSMUSG00000012017	Scarf2	224024	scavenger receptor class F, member 2	-4.26384	1.26728	10.1682	0.00427282	0.118108	-19.2107
ENSMUSG00000038346	Zfp384	269800	zinc finger protein 384	-0.822015	6.3991	10.1641	0.00427933	0.118108	-1.76787
ENSMUSG00000074221	Zfp568	243905	zinc finger protein 568	-2.31197	4.8372	10.1596	0.00428643	0.118108	-4.9656
ENSMUSG00000024425	Ndfip1	65113	Nedd4 family interacting protein 1	-0.847055	5.95819	10.1563	0.00429157	0.118108	-1.79883
ENSMUSG00000038122	Tbc1d32	544696	TBC1 domain family, member 32	-2.30294	4.17948	10.1497	0.00430197	0.118108	-4.93462
ENSMUSG00000031425	Plp1	18823	proteolipid protein (myelin) 1	1.35249	5.8011	10.1456	0.00430858	0.118108	2.55352
ENSMUSG00000022248	Rad1	19355	RAD1 checkpoint DNA exonuclease	-1.63095	4.15513	10.1399	0.00431764	0.118108	-3.09718
ENSMUSG00000044502	Bod1	69556	biorientation of chromosomes in cell division 1	2.23997	3.69218	10.1391	0.00431893	0.118108	4.72388
ENSMUSG00000028085	Gatb	229487	glutamyl-tRNA(Gln) amidotransferase, subunit B	-2.66495	3.95298	10.138	0.00432058	0.118108	-6.34205
ENSMUSG00000036986	Pml	18854	promyelocytic leukemia	-1.20763	5.33509	10.1292	0.00433466	0.118253	-2.30958
ENSMUSG00000021133	Susd6	217684	sushi domain containing 6	-0.845856	7.02902	10.1129	0.00436082	0.118423	-1.79733
ENSMUSG00000001016	Ilf2	67781	interleukin enhancer binding factor 2	2.17152	4.6332	10.1126	0.00436129	0.118423	4.50498
ENSMUSG00000031482	Slc25a15	18408	solute carrier family 25 (mitochondrial carrier ornithine transporter), member 15	4.40744	2.99865	10.1089	0.00436721	0.118423	21.2213
ENSMUSG00000007036	Abhd16a	193742	abhydrolase domain containing 16A	1.6953	4.67538	10.0983	0.00438437	0.118537	3.23844
ENSMUSG00000027937	Jtb	23922	jumping translocation breakpoint	2.24954	4.58449	10.0954	0.00438898	0.118537	4.75533
ENSMUSG00000044734	Serpinb1a	66222	serine (or cysteine) peptidase inhibitor, clade B, member 1a	-5.64389	1.68772	10.074	0.00442384	0.11924	-50.0011
ENSMUSG00000025195	Dnmbp	71972	dynamin binding protein	-1.86575	4.8898	10.0634	0.00444114	0.119265	-3.64457
ENSMUSG00000040521	Tsfm	66399	Ts translation elongation factor, mitochondrial	-4.97154	1.70733	10.0627	0.0044424	0.119265	-31.3748
ENSMUSG00000027935	Rab13	68328	RAB13, member RAS oncogene family	7.26506	0.060738	10.1656	0.00445485	0.119362	153.815
ENSMUSG00000023088	Abcc1	17250	ATP-binding cassette, sub-family C (CFTR/MRP), member 1	-1.22013	6.01025	10.0478	0.00446691	0.119448	-2.32967
ENSMUSG00000047731	Wbp1l	226178	WW domain binding protein 1 like	0.666579	6.80447	10.0375	0.00448404	0.119669	1.5873
ENSMUSG00000028636	Ppcs	106564	phosphopantothenoylcysteine synthetase	-6.28597	0.714665	10.2514	0.00451509	0.120068	-78.0307
ENSMUSG00000059920	4930453N24Rik	67609	RIKEN cDNA 4930453N24 gene	-2.0791	4.65534	10.0178	0.00451677	0.120068	-4.22542
ENSMUSG00000044145	1810024B03Rik	329509	RIKEN cDNA 1810024B03 gene	-4.22992	2.45204	10.0116	0.00452718	0.120108	-18.7644
ENSMUSG00000046711	Hmga1	15361	high mobility group AT-hook 1	-1.55466	4.54181	9.99124	0.00456143	0.120576	-2.93765
ENSMUSG00000005718	Tfap4	83383	transcription factor AP4	-3.61934	2.81611	9.99049	0.00456269	0.120576	-12.2894
ENSMUSG00000038602	Slc35f1	215085	solute carrier family 35, member F1	5.56479	2.3113	9.96621	0.00460395	0.121122	47.3336
ENSMUSG00000071660	Ttc9c	70387	tetratricopeptide repeat domain 9C	0.802142	6.03232	9.96446	0.00460695	0.121122	1.74369
ENSMUSG00000038582	Pptc7	320717	PTC7 protein phosphatase homolog	1.07574	6.21297	9.95966	0.00461516	0.121122	2.1078
ENSMUSG00000023852	Chd1	12648	chromodomain helicase DNA binding protein 1	0.659947	7.56501	9.95253	0.00462738	0.121122	1.58002
ENSMUSG00000039552	Rsph4a	212892	radial spoke head 4 homolog A (Chlamydomonas)	7.41557	-0.492602	10.4733	0.00462819	0.121122	170.73
ENSMUSG00000043467	Zbtb37	240869	zinc finger and BTB domain containing 37	-1.64503	5.33973	9.94411	0.00464188	0.121246	-3.12754
ENSMUSG00000036395	Glb1l2	244757	galactosidase, beta 1-like 2	-8.10206	0.166314	10.2998	0.00465839	0.121323	-274.767
ENSMUSG00000023153	Tmem52	69671	transmembrane protein 52	-6.28459	-0.0342532	10.2936	0.00466832	0.121323	-77.9559
ENSMUSG00000041236	Vps41	218035	VPS41 HOPS complex subunit	-1.10893	6.1303	9.92396	0.00467674	0.121323	-2.15686
ENSMUSG00000043019	Edem3	66967	ER degradation enhancer, mannosidase alpha-like 3	-0.989014	7.16623	9.92164	0.00468078	0.121323	-1.98483
ENSMUSG00000061979	Rcc1l	94254	reculator of chromosome condensation 1 like	-2.93359	2.2173	9.8985	0.00472121	0.121921	-7.64011
ENSMUSG00000027499	Pkia	18767	protein kinase inhibitor, alpha	8.302	0.299757	10.2578	0.00472696	0.121921	315.611
ENSMUSG00000024515	Smad4	17128	SMAD family member 4	1.07305	5.50016	9.88449	0.00474589	0.121921	2.10388
ENSMUSG00000021763	BC067074	408066	cDNA sequence BC067074	6.66195	0.637543	9.97684	0.00477164	0.121921	101.262
ENSMUSG00000074619	1700034I23Rik	73297	FUN14 domain containing 2 pseudogene	-8.15934	1.21796	10.2271	0.00477795	0.121921	-285.895
ENSMUSG00000002346	Slc25a42	73095	solute carrier family 25, member 42	-2.2222	3.28739	9.86605	0.00477858	0.121921	-4.66606
ENSMUSG00000031701	Dnaja2	56445	DnaJ heat shock protein family (Hsp40) member A2	0.799976	6.59474	9.85715	0.00479444	0.121921	1.74107
ENSMUSG00000021595	Nsun2	28114	NOL1/NOP2/Sun domain family member 2	1.19262	5.13496	9.85243	0.00480289	0.121921	2.28568
ENSMUSG00000023118	Sympk	68188	symplekin	-0.903238	6.16332	9.84852	0.00480989	0.121921	-1.87026
ENSMUSG00000044231	Nhlrc1	105193	NHL repeat containing 1	6.7654	0.664851	10.2031	0.00481823	0.121921	108.79
ENSMUSG00000026205	Slc23a3	22626	solute carrier family 23 (nucleobase transporters), member 3	7.11004	-1.03698	10.1965	0.00482926	0.121921	138.145
ENSMUSG00000038872	Zfhx3	11906	zinc finger homeobox 3	-0.488858	10.3369	9.83333	0.00483719	0.121921	-1.40333
ENSMUSG00000095789	Nupr1l	69034	nuclear protein transcriptional regulator 1 like	-5.04223	1.20876	9.82937	0.00484433	0.121921	-32.9506
ENSMUSG00000059208	Hnrnpm	76936	heterogeneous nuclear ribonucleoprotein M	-0.700944	7.17495	9.82425	0.00485359	0.121921	-1.62557
ENSMUSG00000020721	Helz	78455	helicase with zinc finger domain	-0.614367	7.54895	9.82126	0.00485902	0.121921	-1.53089
ENSMUSG00000021668	Polk	27015	polymerase (DNA directed), kappa	-1.54862	5.21646	9.81988	0.00486152	0.121921	-2.92536
ENSMUSG00000055421	Pcdh9	211712	protocadherin 9	6.81656	1.2247	10.1759	0.00486421	0.121921	112.717
ENSMUSG00000061603	Akap6	238161	A kinase (PRKA) anchor protein 6	5.45189	0.745829	9.81722	0.00486635	0.121921	43.7707
ENSMUSG00000035246	Pcyt1b	236899	phosphate cytidylyltransferase 1, choline, beta isoform	7.59578	-0.341574	10.1583	0.0048943	0.122394	193.445
ENSMUSG00000070369	Itgad	381924	integrin, alpha D	6.94576	-0.892202	10.2863	0.0049322	0.123079	123.277
ENSMUSG00000052151	Plpp2	50784	phospholipid phosphatase 2	-2.67083	3.1134	9.77702	0.00493994	0.123079	-6.36795
ENSMUSG00000038000	Acd	497652	adrenocortical dysplasia	-3.25756	3.18509	9.73387	0.0050203	0.124851	-9.56365
ENSMUSG00000067818	Myl9	98932	myosin, light polypeptide 9, regulatory	7.76413	0.492973	10.2241	0.00503823	0.125067	217.388
ENSMUSG00000034312	Iqsec1	232227	IQ motif and Sec7 domain 1	-1.08084	5.96764	9.69935	0.00508562	0.125915	-2.11527
ENSMUSG00000054850	Smim10l2a	320237	small integral membrane protein 10 like 2A	-7.27023	1.57118	9.9158	0.00509104	0.125915	-154.369
ENSMUSG00000020334	Slc22a4	30805	solute carrier family 22 (organic cation transporter), member 4	7.85907	0.0844187	10.0369	0.00510736	0.125931	232.175
ENSMUSG00000033350	Chst2	54371	carbohydrate sulfotransferase 2	2.59972	4.64881	9.68642	0.00511033	0.125931	6.0617
ENSMUSG00000024096	Ralbp1	19765	ralA binding protein 1	-1.05172	5.89048	9.6669	0.00514789	0.126196	-2.073
ENSMUSG00000052212	Cd177	68891	CD177 antigen	-3.62628	4.71022	9.65528	0.0051704	0.126196	-12.3486
ENSMUSG00000004100	Ppan	235036	peter pan homolog	-2.05751	3.33833	9.65171	0.00517733	0.126196	-4.16266
ENSMUSG00000019539	Rcn3	52377	reticulocalbin 3, EF-hand calcium binding domain	6.05801	0.51019	9.64975	0.00518114	0.126196	66.6258
ENSMUSG00000005667	Mthfd2	17768	methylenetetrahydrofolate dehydrogenase (NAD+ dependent), methenyltetrahydrofolate cyclohydrolase	-2.29032	3.2074	9.64746	0.0051856	0.126196	-4.89164
ENSMUSG00000048330	Ric3	320360	RIC3 acetylcholine receptor chaperone	1.18598	5.82261	9.64337	0.00519358	0.126196	2.27518
ENSMUSG00000053436	Mapk14	26416	mitogen-activated protein kinase 14	0.665	8.11748	9.64329	0.00519373	0.126196	1.58557
ENSMUSG00000049176	Frmpd4	333605	FERM and PDZ domain containing 4	-7.20978	0.94323	9.85809	0.00519808	0.126196	-148.034
ENSMUSG00000030557	Mef2a	17258	myocyte enhancer factor 2A	-0.420228	10.0998	9.6374	0.00520523	0.126196	-1.33814
ENSMUSG00000022914	Brwd1	93871	bromodomain and WD repeat domain containing 1	-0.662206	7.50565	9.6319	0.00521601	0.126231	-1.5825
ENSMUSG00000034755	Pcdh11x	245578	protocadherin 11 X-linked	7.81293	-0.471889	10.1156	0.00522945	0.126237	224.868
ENSMUSG00000051515	Fam181b	58238	family with sequence similarity 181, member B	6.40785	-0.534506	10.1125	0.00523497	0.126237	84.909
ENSMUSG00000061186	Sfmbt2	353282	Scm-like with four mbt domains 2	4.60387	3.27879	9.61378	0.00525165	0.126414	24.3166
ENSMUSG00000087305	A430035B10Rik	320312	RIKEN cDNA A430035B10 gene	3.67905	2.23947	9.59262	0.00529363	0.12713	12.8087
ENSMUSG00000029510	Gpc2	71951	glypican 2 (cerebroglycan)	1.18165	5.13404	9.58932	0.00530021	0.12713	2.26835
ENSMUSG00000044477	Zfand3	21769	zinc finger, AN1-type domain 3	-1.20198	5.71946	9.58351	0.00531181	0.127155	-2.30056
ENSMUSG00000031987	Egln1	112405	egl-9 family hypoxia-inducible factor 1	1.29474	6.03301	9.57028	0.00533833	0.127155	2.45333
ENSMUSG00000021200	Asb2	65256	ankyrin repeat and SOCS box-containing 2	-1.72765	4.01967	9.56797	0.00534298	0.127155	-3.31188
ENSMUSG00000003809	Gcdh	270076	glutaryl-Coenzyme A dehydrogenase	-3.48162	2.73262	9.56672	0.0053455	0.127155	-11.1705
ENSMUSG00000002741	Ykt6	56418	YKT6 v-SNARE homolog (S. cerevisiae)	1.35897	6.26273	9.56464	0.00534968	0.127155	2.56503
ENSMUSG00000026254	Eif4e2	26987	eukaryotic translation initiation factor 4E member 2	-0.907182	6.2218	9.5573	0.00536451	0.127155	-1.87538
ENSMUSG00000048970	C1galt1c1	59048	C1GALT1-specific chaperone 1	1.3819	5.54525	9.55588	0.00536738	0.127155	2.60612
ENSMUSG00000039449	Prpf18	67229	pre-mRNA processing factor 18	-1.49406	5.26822	9.55133	0.00537659	0.127155	-2.81681
ENSMUSG00000036959	Bcorl1	320376	BCL6 co-repressor-like 1	-2.11496	4.16588	9.54508	0.00538927	0.127232	-4.33178
ENSMUSG00000048174	Tmem81	74626	transmembrane protein 81	-5.08139	1.30815	9.64052	0.00539968	0.127255	-33.8571
ENSMUSG00000052798	Nup107	103468	nucleoporin 107	-1.77203	4.21015	9.52405	0.00543219	0.127424	-3.41535
ENSMUSG00000002897	Il17ra	16172	interleukin 17 receptor A	0.523928	8.58606	9.52278	0.00543481	0.127424	1.43786
ENSMUSG00000015314	Slamf6	30925	SLAM family member 6	-2.03537	3.96771	9.52262	0.00543514	0.127424	-4.09927
ENSMUSG00000029004	Kmt2e	69188	lysine (K)-specific methyltransferase 2E	0.454101	9.18519	9.50661	0.00546807	0.127518	1.36993
ENSMUSG00000036862	Dchs1	233651	dachsous cadherin related 1	5.63887	1.02062	9.50521	0.00547097	0.127518	49.8274
ENSMUSG00000074211	Sdhaf1	68332	succinate dehydrogenase complex assembly factor 1	-4.02866	2.46097	9.49985	0.00548206	0.127518	-16.321
ENSMUSG00000032481	Smarcc1	20588	SWI/SNF related, matrix associated, actin dependent regulator of chromatin, subfamily c, member 1	0.772618	6.52854	9.49908	0.00548365	0.127518	1.70837
ENSMUSG00000041440	Gk5	235533	glycerol kinase 5 (putative)	-4.25075	3.29073	9.49716	0.00548762	0.127518	-19.0372
ENSMUSG00000022313	Utp23	78581	UTP23 small subunit processome component	-1.86733	4.49779	9.49322	0.00549581	0.127518	-3.64856
ENSMUSG00000028329	Xpa	22590	xeroderma pigmentosum, complementation group A	1.46654	4.3398	9.48619	0.00551042	0.127638	2.76358
ENSMUSG00000027430	Dtd1	66044	D-tyrosyl-tRNA deacylase 1	-2.80078	3.53647	9.47003	0.00554419	0.128188	-6.96815
ENSMUSG00000046402	Rbp1	19659	retinol binding protein 1, cellular	7.34503	0.0422141	9.93834	0.00555943	0.128188	162.583
ENSMUSG00000018678	Sp2	78912	Sp2 transcription factor	1.38075	5.20154	9.46123	0.00556268	0.128188	2.60405
ENSMUSG00000044167	Foxo1	56458	forkhead box O1	-1.41205	6.42669	9.45408	0.00557774	0.128301	-2.66116
ENSMUSG00000025372	Baiap2	108100	brain-specific angiogenesis inhibitor 1-associated protein 2	-2.29786	3.76204	9.4483	0.00558996	0.128301	-4.91727
ENSMUSG00000034349	Smc4	70099	structural maintenance of chromosomes 4	-1.62557	5.87415	9.44086	0.00560571	0.128301	-3.08563
ENSMUSG00000010609	Psen2	19165	presenilin 2	2.31353	3.00843	9.43931	0.00560901	0.128301	4.97098
ENSMUSG00000027245	Hypk	67693	huntingtin interacting protein K	1.45234	5.06526	9.43317	0.00562206	0.128301	2.73651
ENSMUSG00000020399	Havcr2	171285	hepatitis A virus cellular receptor 2	0.549751	9.39003	9.43199	0.00562457	0.128301	1.46383
ENSMUSG00000020088	Sar1a	20224	secretion associated Ras related GTPase 1A	0.839324	6.96739	9.41185	0.00566765	0.128761	1.78921
ENSMUSG00000023868	Pde10a	23984	phosphodiesterase 10A	-3.9429	2.00253	9.40918	0.00567341	0.128761	-15.3791
ENSMUSG00000024260	Sap130	269003	Sin3A associated protein	-1.03284	6.66987	9.40746	0.0056771	0.128761	-2.04605
ENSMUSG00000017314	Mpp2	50997	membrane protein, palmitoylated 2 (MAGUK p55 subfamily member 2)	7.71961	0.203546	9.7355	0.00568288	0.128761	210.782
ENSMUSG00000063511	Snrnp70	20637	small nuclear ribonucleoprotein 70 (U1)	0.578523	7.73918	9.39232	0.00570978	0.128852	1.49332
ENSMUSG00000051323	Pcdh19	279653	protocadherin 19	7.90446	-0.404306	9.85741	0.00571787	0.128852	239.596
ENSMUSG00000070605	Zfp992	433791	zinc finger protein 992	-1.26749	5.8703	9.38732	0.00572063	0.128852	-2.40743
ENSMUSG00000016541	Atxn10	54138	ataxin 10	1.19642	5.88955	9.38113	0.00573408	0.128852	2.2917
ENSMUSG00000023020	Cox14	66379	cytochrome c oxidase assembly protein 14	-3.22602	2.79804	9.37514	0.00574713	0.128852	-9.35683
ENSMUSG00000054008	Ndst1	15531	N-deacetylase/N-sulfotransferase (heparan glucosaminyl) 1	-0.993655	5.79005	9.37266	0.00575253	0.128852	-1.99122
ENSMUSG00000022106	Rcbtb2	105670	regulator of chromosome condensation (RCC1) and BTB (POZ) domain containing protein 2	0.74399	7.34434	9.3714	0.00575529	0.128852	1.6748
ENSMUSG00000041577	Prelp	116847	proline arginine-rich end leucine-rich repeat	4.44479	2.0693	9.36777	0.00576323	0.128852	21.7778
ENSMUSG00000019948	Actr6	67019	ARP6 actin-related protein 6	3.0823	3.39656	9.3615	0.00577697	0.128946	8.46962
ENSMUSG00000059713	Rcan3	53902	regulator of calcineurin 3	-1.30385	5.79739	9.34887	0.00580476	0.129352	-2.46887
ENSMUSG00000037972	Snn	20621	stannin	0.977359	7.13391	9.30785	0.00589602	0.131097	1.96886
ENSMUSG00000042644	Itpr3	16440	inositol 1,4,5-triphosphate receptor 3	-1.49494	4.53245	9.30351	0.00590576	0.131097	-2.81852
ENSMUSG00000025199	Chuk	12675	conserved helix-loop-helix ubiquitous kinase	1.07051	6.40505	9.29994	0.00591378	0.131097	2.10018
ENSMUSG00000042320	Prox2	73422	prospero homeobox 2	-4.00518	2.28218	9.29635	0.00592189	0.131097	-16.0576
ENSMUSG00000037287	Tbcel	272589	tubulin folding cofactor E-like	1.76646	4.55652	9.28843	0.00593977	0.131199	3.40218
ENSMUSG00000039835	Nhsl1	215819	NHS-like 1	-5.89302	2.0025	9.2857	0.00594594	0.131199	-59.4261
ENSMUSG00000031833	Mast3	546071	microtubule associated serine/threonine kinase 3	-0.56382	7.70768	9.28055	0.00595763	0.131243	-1.47818
ENSMUSG00000062203	Gspt1	14852	G1 to S phase transition 1	0.582266	7.41503	9.26864	0.00598473	0.131623	1.4972
ENSMUSG00000090565	4930405O22Rik	414079	RIKEN cDNA 4930405O22 gene	-4.38303	1.29395	9.26441	0.00599438	0.131623	-20.8653
ENSMUSG00000061950	Ppp4r1	70351	protein phosphatase 4, regulatory subunit 1	1.02793	6.13137	9.25383	0.00601861	0.13194	2.0391
ENSMUSG00000071054	Safb	224903	scaffold attachment factor B	-0.92476	6.3196	9.24396	0.00604132	0.132103	-1.89837
ENSMUSG00000031954	Cfdp1	23837	craniofacial development protein 1	1.51697	5.41346	9.24212	0.00604557	0.132103	2.86188
ENSMUSG00000043099	Hic1	15248	hypermethylated in cancer 1	7.87432	0.926119	9.54432	0.0060853	0.132437	234.642
ENSMUSG00000060012	Kif13b	16554	kinesin family member 13B	-1.71393	5.11166	9.22478	0.00608571	0.132437	-3.28052
ENSMUSG00000097048	1600020E01Rik	72012	RIKEN cDNA 1600020E01 gene	-2.56052	3.78097	9.22281	0.0060903	0.132437	-5.89922
ENSMUSG00000057329	Bcl2	12043	B cell leukemia/lymphoma 2	1.3513	5.29291	9.2022	0.00613842	0.133269	2.55142
ENSMUSG00000028337	Coro2a	107684	coronin, actin binding protein 2A	1.12921	5.69043	9.19036	0.00616629	0.133489	2.1874
ENSMUSG00000021986	Amer2	72125	APC membrane recruitment 2	6.0496	1.02334	9.18948	0.00616835	0.133489	66.2388
ENSMUSG00000003863	Ppfia3	76787	protein tyrosine phosphatase, receptor type, f polypeptide (PTPRF), interacting protein (liprin), alpha 3	6.56438	-0.671703	9.50055	0.00618186	0.133568	94.6399
ENSMUSG00000017167	Cntnap1	53321	contactin associated protein-like 1	-5.00197	1.03921	9.16837	0.00621837	0.133921	-32.0437
ENSMUSG00000021022	Ppp2r3c	59032	protein phosphatase 2, regulatory subunit B'', gamma	1.82711	4.13769	9.16826	0.00621864	0.133921	3.54825
ENSMUSG00000021752	Kctd6	71393	potassium channel tetramerisation domain containing 6	-2.48451	4.68437	9.16322	0.00623063	0.133921	-5.59644
ENSMUSG00000079020	Slc45a4	106068	solute carrier family 45, member 4	-1.36425	4.75839	9.15826	0.00624247	0.133921	-2.57443
ENSMUSG00000001260	Gabrg1	14405	gamma-aminobutyric acid (GABA) A receptor, subunit gamma 1	6.57225	0.888472	9.24306	0.00626278	0.133921	95.1577
ENSMUSG00000078234	Klhdc7a	242721	kelch domain containing 7A	7.01452	0.0201941	9.24172	0.00626595	0.133921	129.294
ENSMUSG00000047821	Trim16	94092	tripartite motif-containing 16	4.63195	1.54851	9.14776	0.00626762	0.133921	24.7944
ENSMUSG00000024327	Slc39a7	14977	solute carrier family 39 (zinc transporter), member 7	1.03022	5.26937	9.14263	0.00627996	0.133973	2.04233
ENSMUSG00000030093	Wnt7a	22421	wingless-type MMTV integration site family, member 7A	-9.49069	1.04007	9.44498	0.00630691	0.134027	-719.421
ENSMUSG00000039519	Cyp7b1	13123	cytochrome P450, family 7, subfamily b, polypeptide 1	7.35468	-0.637652	9.44294	0.00631156	0.134027	163.673
ENSMUSG00000026674	Ddr2	18214	discoidin domain receptor family, member 2	7.55384	1.0797	9.12774	0.0063159	0.134027	187.903
ENSMUSG00000029575	Mmab	77697	methylmalonic aciduria (cobalamin deficiency) cblB type homolog (human)	3.47805	3.02239	9.12513	0.00632222	0.134027	11.1429
ENSMUSG00000004360	9330159F19Rik	212448	RIKEN cDNA 9330159F19 gene	5.80074	1.8796	9.10983	0.00635943	0.134229	55.744
ENSMUSG00000030600	Lrfn1	80749	leucine rich repeat and fibronectin type III domain containing 1	7.00552	-0.504761	9.55046	0.00636662	0.134229	128.49
ENSMUSG00000021494	Ddx41	72935	DEAD (Asp-Glu-Ala-Asp) box polypeptide 41	-1.91392	4.45509	9.10569	0.00636954	0.134229	-3.76831
ENSMUSG00000018209	Stk4	58231	serine/threonine kinase 4	0.537206	7.8507	9.10489	0.00637148	0.134229	1.45116
ENSMUSG00000040649	Rimklb	108653	ribosomal modification protein rimK-like family member B	8.60961	-0.227016	9.54134	0.00638712	0.134348	390.617
ENSMUSG00000050822	Slc29a4	243328	solute carrier family 29 (nucleoside transporters), member 4	6.83349	-0.409259	9.52414	0.00642598	0.134552	114.047
ENSMUSG00000032530	Lyzl4	69032	lysozyme-like 4	5.51364	0.347748	9.38825	0.00643753	0.134552	45.6848
ENSMUSG00000074643	Cpne1	266692	copine I	-2.03079	5.36384	9.07175	0.00645307	0.134552	-4.08629
ENSMUSG00000036104	Rab3gap1	226407	RAB3 GTPase activating protein subunit 1	-1.14041	5.41049	9.07175	0.00645307	0.134552	-2.20444
ENSMUSG00000047250	Ptgs1	19224	prostaglandin-endoperoxide synthase 1	-0.481544	9.94349	9.0708	0.00645542	0.134552	-1.39624
ENSMUSG00000053025	Sv2b	64176	synaptic vesicle glycoprotein 2 b	9.24665	0.403712	10.0316	0.00645674	0.134552	607.462
ENSMUSG00000032311	Nrg4	83961	neuregulin 4	-5.01304	2.22622	9.06269	0.00647559	0.134552	-32.2907
ENSMUSG00000028675	Pnrc2	52830	proline-rich nuclear receptor coactivator 2	0.561814	6.95908	9.0543	0.00649649	0.134552	1.47612
ENSMUSG00000042549	Map2k3os	24082	mitogen-activated protein kinase kinase 3, opposite strand	7.24034	-0.547081	9.47981	0.00652739	0.134552	151.203
ENSMUSG00000074269	Rec114	73673	REC114 meiotic recombination protein	5.95193	0.887841	9.03943	0.00653376	0.134552	61.9026
ENSMUSG00000044501	Zfp758	224598	zinc finger protein 758	-1.98679	4.21995	9.03736	0.00653896	0.134552	-3.96353
ENSMUSG00000039611	Tmem246	67063	transmembrane protein 246	6.60555	-0.221375	9.47157	0.00654643	0.134552	97.3797
ENSMUSG00000020063	Sirt1	93759	sirtuin 1	1.14799	5.23064	9.02901	0.00656	0.134552	2.21604
ENSMUSG00000026849	Tor1a	30931	torsin family 1, member A (torsin A)	-1.79908	3.95931	9.02625	0.00656699	0.134552	-3.47998
ENSMUSG00000026234	Ncl	17975	nucleolin	0.610063	8.43553	9.02437	0.00657172	0.134552	1.52633
ENSMUSG00000041506	Rrp9	27966	RRP9, small subunit (SSU) processome component, homolog (yeast)	-4.45756	2.05204	9.0234	0.00657419	0.134552	-21.9714
ENSMUSG00000049792	Bag5	70369	BCL2-associated athanogene 5	1.64261	5.01696	9.01977	0.00658338	0.134552	3.1223
ENSMUSG00000040785	Ttc3	22129	tetratricopeptide repeat domain 3	0.635772	7.02294	9.01038	0.00660724	0.134552	1.55377
ENSMUSG00000036968	Cnpy4	66455	canopy FGF signaling regulator 4	-1.96671	4.20895	9.00751	0.00661454	0.134552	-3.90876
ENSMUSG00000004667	Polr2e	66420	polymerase (RNA) II (DNA directed) polypeptide E	-1.63267	4.57604	9.00529	0.0066202	0.134552	-3.10086
ENSMUSG00000007033	Hspa1l	15482	heat shock protein 1-like	7.28745	1.54931	9.31014	0.00662233	0.134552	156.222
ENSMUSG00000047515	BC049715	320135	cDNA sequence BC049715	-7.54209	-0.258392	9.19625	0.00662252	0.134552	-186.378
ENSMUSG00000018965	Ywhah	22629	tyrosine 3-monooxygenase/tryptophan 5-monooxygenase activation protein, eta polypeptide	0.578435	9.12493	8.9911	0.0066565	0.134552	1.49323
ENSMUSG00000028964	Park7	57320	Parkinson disease (autosomal recessive, early onset) 7	1.58872	4.87033	8.98887	0.00666222	0.134552	3.00783
ENSMUSG00000033768	Nrxn2	18190	neurexin II	5.67499	0.30912	8.98832	0.00666363	0.134552	51.0907
ENSMUSG00000039137	Whrn	73750	whirlin	-0.971209	6.12264	8.98794	0.00666461	0.134552	-1.96048
ENSMUSG00000002105	Slc39a13	68427	solute carrier family 39 (metal ion transporter), member 13	-2.03203	5.0439	8.98231	0.00667908	0.134552	-4.08979
ENSMUSG00000052783	Grk4	14772	G protein-coupled receptor kinase 4	-0.963374	5.1839	8.98198	0.00667993	0.134552	-1.94986
ENSMUSG00000021223	Papln	170721	papilin, proteoglycan-like sulfated glycoprotein	-7.0026	-0.314865	9.28389	0.00668575	0.134552	-128.231
ENSMUSG00000024891	Slc29a2	13340	solute carrier family 29 (nucleoside transporters), member 2	-6.17039	0.777624	9.1655	0.00669854	0.134609	-72.0232
ENSMUSG00000025351	Cd63	12512	CD63 antigen	0.710082	7.83251	8.96824	0.00671543	0.134732	1.6359
ENSMUSG00000020193	Zpbp	53604	zona pellucida binding protein	-6.96187	-0.266968	9.26113	0.0067413	0.134732	-124.661
ENSMUSG00000064115	Cadm2	239857	cell adhesion molecule 2	4.30681	2.46194	8.94432	0.00677773	0.134732	19.7915
ENSMUSG00000063235	Ptpmt1	66461	protein tyrosine phosphatase, mitochondrial 1	1.67663	4.47681	8.93558	0.00680064	0.134732	3.1968
ENSMUSG00000032580	Rbm5	83486	RNA binding motif protein 5	0.43885	9.29658	8.93092	0.00681291	0.134732	1.35552
ENSMUSG00000046688	Tifa	211550	TRAF-interacting protein with forkhead-associated domain	-0.761574	6.71255	8.92929	0.00681718	0.134732	-1.69534
ENSMUSG00000025324	Atp10a	11982	ATPase, class V, type 10A	-5.31211	1.77149	8.92534	0.0068276	0.134732	-39.7288
ENSMUSG00000029840	Mtpn	14489	myotrophin	0.500999	8.20807	8.92401	0.00683112	0.134732	1.41519
ENSMUSG00000063889	Crem	12916	cAMP responsive element modulator	-3.18294	2.27449	8.92154	0.00683765	0.134732	-9.08159
ENSMUSG00000020019	Ntn4	57764	netrin 4	7.56148	-0.176584	9.34198	0.00685436	0.134732	188.9
ENSMUSG00000026779	Mastl	67121	microtubule associated serine/threonine kinase-like	-4.38933	1.67796	8.91308	0.00686004	0.134732	-20.9566
ENSMUSG00000024420	Zfp521	225207	zinc finger protein 521	7.56214	5.96048e-08	9.33713	0.0068662	0.134732	188.986
ENSMUSG00000048402	Gli2	14633	GLI-Kruppel family member GLI2	8.17561	-0.185774	9.33065	0.00688205	0.134732	289.136
ENSMUSG00000023905	Tnfrsf12a	27279	tumor necrosis factor receptor superfamily, member 12a	-3.40142	2.89001	8.90354	0.00688541	0.134732	-10.5664
ENSMUSG00000040681	Hmgn1	15312	high mobility group nucleosomal binding domain 1	0.918352	6.40636	8.90224	0.00688887	0.134732	1.88995
ENSMUSG00000030672	Mylpf	17907	myosin light chain, phosphorylatable, fast skeletal muscle	7.94414	-0.470187	9.32738	0.00689007	0.134732	246.277
ENSMUSG00000028646	Rragc	54170	Ras-related GTP binding C	0.808157	6.52576	8.90068	0.00689302	0.134732	1.75097
ENSMUSG00000042660	Wdr55	67936	WD repeat domain 55	1.6184	3.93179	8.8984	0.0068991	0.134732	3.07035
ENSMUSG00000072889	Nfxl1	100978	nuclear transcription factor, X-box binding-like 1	-0.933219	6.13345	8.89787	0.00690051	0.134732	-1.90953
ENSMUSG00000044533	Rps2	16898	ribosomal protein S2	0.628532	7.19686	8.89379	0.00691143	0.134732	1.54599
ENSMUSG00000060098	Prmt7	214572	protein arginine N-methyltransferase 7	-2.64308	4.41479	8.89275	0.00691421	0.134732	-6.24665
ENSMUSG00000004264	Phb2	12034	prohibitin 2	1.15204	5.60819	8.88816	0.00692648	0.134777	2.22228
ENSMUSG00000050345	4930486L24Rik	214639	RIKEN cDNA 4930486L24 gene	-7.42795	0.517929	9.17468	0.00695705	0.135177	-172.201
ENSMUSG00000029095	Ablim2	231148	actin-binding LIM protein 2	-7.45283	0.638689	9.16851	0.00697274	0.135223	-175.197
ENSMUSG00000021012	Zc3h14	75553	zinc finger CCCH type containing 14	-0.911984	6.01399	8.8685	0.00697944	0.135223	-1.88163
ENSMUSG00000053684	BC048403	270802	cDNA sequence BC048403	-3.83083	3.26091	8.85962	0.00700348	0.135397	-14.2297
ENSMUSG00000033033	Calhm2	72691	calcium homeostasis modulator family member 2	0.969356	6.42147	8.85513	0.00701567	0.135397	1.95797
ENSMUSG00000062861	Zfp28	22690	zinc finger protein 28	-3.01771	3.7701	8.85038	0.00702861	0.135397	-8.09882
ENSMUSG00000024986	Hhex	15242	hematopoietically expressed homeobox	-1.09084	7.13055	8.84025	0.00705627	0.135397	-2.12998
ENSMUSG00000003824	Syce2	71846	synaptonemal complex central element protein 2	-4.28209	2.32052	8.84017	0.00705649	0.135397	-19.4552
ENSMUSG00000057551	Zfp317	244713	zinc finger protein 317	-2.92007	2.9665	8.83913	0.00705933	0.135397	-7.56885
ENSMUSG00000039686	Zer1	227693	zyg-11 related, cell cycle regulator	1.26883	4.82894	8.83731	0.00706432	0.135397	2.40966
ENSMUSG00000030472	Ceacam18	72431	carcinoembryonic antigen-related cell adhesion molecule 18	-5.54593	0.842264	8.83404	0.00707328	0.135397	-46.7188
ENSMUSG00000027163	Commd9	76501	COMM domain containing 9	-2.60438	3.13678	8.83148	0.0070803	0.135397	-6.08128
ENSMUSG00000047141	Zfp654	72020	zinc finger protein 654	0.927329	5.46024	8.82842	0.00708871	0.135397	1.90175
ENSMUSG00000027968	Larp7	28036	La ribonucleoprotein domain family, member 7	1.95036	5.17283	8.8237	0.00710173	0.13542	3.86471
ENSMUSG00000046709	Mapk10	26414	mitogen-activated protein kinase 10	8.46628	0.537875	9.2393	0.00710995	0.13542	353.676
ENSMUSG00000040693	Slco4c1	227394	solute carrier organic anion transporter family, member 4C1	-6.38484	0.672604	8.90286	0.00712404	0.135497	-83.566
ENSMUSG00000079553	Kifc1	100502766	kinesin family member C1	-6.96715	-0.174681	8.98882	0.00715468	0.135889	-125.118
ENSMUSG00000032220	Myo1e	71602	myosin IE	1.40407	5.41682	8.79823	0.00717231	0.136032	2.64647
ENSMUSG00000096971	4930556M19Rik	75259	RIKEN cDNA 4930556M19 gene	4.01161	1.21015	8.77776	0.0072296	0.13672	16.1293
ENSMUSG00000027612	Mmp24	17391	matrix metallopeptidase 24	-7.25706	-0.494148	8.95873	0.00723577	0.13672	-152.965
ENSMUSG00000022781	Pak2	224105	p21 (RAC1) activated kinase 2	0.441839	8.50964	8.77442	0.00723897	0.13672	1.35833
ENSMUSG00000016257	Prelid3b	66390	PRELI domain containing 3B	1.30442	5.50376	8.77065	0.0072496	0.13673	2.46985
ENSMUSG00000055137	Sugct	192136	succinyl-CoA glutarate-CoA transferase	6.95983	-0.505255	9.16613	0.0072986	0.137222	124.485
ENSMUSG00000039328	Rnf122	68867	ring finger protein 122	2.47202	3.50957	8.75272	0.00730035	0.137222	5.5482
ENSMUSG00000001517	Foxm1	14235	forkhead box M1	-2.9168	3.51221	8.75067	0.0073062	0.137222	-7.55171
ENSMUSG00000049580	Tsku	244152	tsukushi, small leucine rich proteoglycan	-7.78942	-0.430713	8.91599	0.00735271	0.137904	-221.232
ENSMUSG00000070639	Lrrc8b	433926	leucine rich repeat containing 8 family, member B	-3.3703	1.94463	8.73061	0.00736349	0.137915	-10.341
ENSMUSG00000036636	Clcn7	26373	chloride channel, voltage-sensitive 7	-1.17702	5.34664	8.71645	0.00740421	0.138318	-2.2611
ENSMUSG00000038540	Tmc3	233424	transmembrane channel-like gene family 3	-6.1077	0.545637	8.79965	0.00741073	0.138318	-68.9604
ENSMUSG00000015568	Lpl	16956	lipoprotein lipase	0.829796	6.62358	8.70549	0.00743594	0.138318	1.77743
ENSMUSG00000036743	Psma8	73677	proteasome (prosome, macropain) subunit, alpha type, 8	-4.74481	2.38136	8.70129	0.00744811	0.138318	-26.812
ENSMUSG00000030602	Pak4	70584	p21 (RAC1) activated kinase 4	-2.01376	4.05367	8.69452	0.00746782	0.138318	-4.03832
ENSMUSG00000029613	Eif2ak1	15467	eukaryotic translation initiation factor 2 alpha kinase 1	-0.835963	6.28122	8.68856	0.00748519	0.138318	-1.78505
ENSMUSG00000058446	Znrf2	387524	zinc and ring finger 2	0.597428	8.06927	8.68665	0.0074908	0.138318	1.51302
ENSMUSG00000089759	3632454L22Rik	320606	RIKEN cDNA 3632454L22 gene	7.9788	0.111082	8.97037	0.00749832	0.138318	252.266
ENSMUSG00000024667	Tmem216	68642	transmembrane protein 216	-4.2172	2.13212	8.6837	0.00749942	0.138318	-18.5996
ENSMUSG00000050587	Lrrc4c	241568	leucine rich repeat containing 4C	7.57755	-0.132083	8.96196	0.00752157	0.138318	191.016
ENSMUSG00000063488	Zkscan7	382118	zinc finger with KRAB and SCAN domains 7	4.81691	2.56227	8.67511	0.0075246	0.138318	28.1861
ENSMUSG00000050538	B230217C12Rik	68127	RIKEN cDNA B230217C12 gene	6.15354	-0.162544	9.07598	0.00753885	0.138318	71.1868
ENSMUSG00000057133	Chd6	71389	chromodomain helicase DNA binding protein 6	-0.610625	7.08857	8.66587	0.00755181	0.138318	-1.52692
ENSMUSG00000029860	Zyx	22793	zyxin	-0.845944	6.71433	8.66545	0.00755306	0.138318	-1.79744
ENSMUSG00000027171	Prrg4	228413	proline rich Gla (G-carboxyglutamic acid) 4 (transmembrane)	-7.66539	0.0135074	8.9474	0.00756205	0.138318	-203.008
ENSMUSG00000023979	Guca1b	107477	guanylate cyclase activator 1B	-7.10741	0.877667	8.83955	0.00756714	0.138318	-137.894
ENSMUSG00000020116	Pno1	66249	partner of NOB1 homolog	-1.95933	3.284	8.65904	0.007572	0.138318	-3.88882
ENSMUSG00000039183	Nubp2	26426	nucleotide binding protein 2	-2.10111	3.78278	8.65657	0.00757929	0.138318	-4.2904
ENSMUSG00000024677	Ms4a6b	69774	membrane-spanning 4-domains, subfamily A, member 6B	0.671968	7.38299	8.65408	0.00758667	0.138318	1.59325
ENSMUSG00000021287	Xrcc3	74335	X-ray repair complementing defective repair in Chinese hamster cells 3	-3.39049	2.54905	8.64795	0.00760487	0.138318	-10.4867
ENSMUSG00000096981	Gm16845	100503652	predicted gene, 16845	-5.18228	1.50194	8.64717	0.00760719	0.138318	-36.3096
ENSMUSG00000097061	9330151L19Rik	414085	RIKEN cDNA 9330151L19 gene	-3.72705	3.56441	8.64505	0.00761349	0.138318	-13.242
ENSMUSG00000036940	Kdm1a	99982	lysine (K)-specific demethylase 1A	1.00727	6.04169	8.64267	0.0076206	0.138318	2.01011
ENSMUSG00000030793	Pycard	66824	PYD and CARD domain containing	-0.89311	5.57718	8.63859	0.00763275	0.138353	-1.85718
ENSMUSG00000031112	Stk26	70415	serine/threonine kinase 26	-1.92722	3.74582	8.63515	0.00764304	0.138353	-3.80322
ENSMUSG00000003527	Ess2	27886	ess-2 splicing factor	1.88134	3.76852	8.63029	0.00765758	0.138431	3.68417
ENSMUSG00000028382	Ptbp3	230257	polypyrimidine tract binding protein 3	0.346435	9.4626	8.62113	0.00768506	0.138742	1.27142
ENSMUSG00000021519	Mterf3	66410	mitochondrial transcription termination factor 3	0.828762	6.04633	8.61749	0.00769603	0.138755	1.77616
ENSMUSG00000086503	Xist	213742	inactive X specific transcripts	6.50739	3.34475	8.60157	0.00774413	0.139284	90.9747
ENSMUSG00000092241	Gm20522	105245272	predicted gene 20522	7.83209	-0.508225	8.87706	0.00776105	0.139284	227.874
ENSMUSG00000017781	Pitpna	18738	phosphatidylinositol transfer protein, alpha	0.620422	8.12762	8.59577	0.00776176	0.139284	1.53733
ENSMUSG00000026163	Sphkap	77629	SPHK1 interactor, AKAP domain containing	8.36906	-0.326217	9.28377	0.00776663	0.139284	330.626
ENSMUSG00000020519	Sap30l	50724	SAP30-like	-3.49014	1.66333	8.58053	0.00780824	0.139831	-11.2366
ENSMUSG00000061650	Med9	192191	mediator complex subunit 9	-3.75939	2.91619	8.57559	0.00782339	0.139831	-13.5422
ENSMUSG00000034120	Srsf2	20382	serine/arginine-rich splicing factor 2	-0.431875	9.47199	8.57363	0.00782941	0.139831	-1.34899
ENSMUSG00000031023	Akip1	57373	A kinase (PRKA) interacting protein 1	3.45327	2.89818	8.56926	0.00784284	0.139831	10.9531
ENSMUSG00000014355	Anapc1	17222	anaphase promoting complex subunit 1	0.660618	7.29738	8.56134	0.00786723	0.139831	1.58076
ENSMUSG00000048581	E130311K13Rik	329659	RIKEN cDNA E130311K13 gene	-5.54799	2.73292	8.55598	0.0078838	0.139831	-46.7854
ENSMUSG00000037418	Best1	24115	bestrophin 1	-1.7921	3.26671	8.55267	0.00789404	0.139831	-3.46319
ENSMUSG00000057069	Ero1lb	67475	ERO1-like beta (S. cerevisiae)	1.09433	5.65453	8.55201	0.00789609	0.139831	2.13513
ENSMUSG00000055897	Ppp4r1l-ps	100043911	protein phosphatase 4, regulatory subunit 1-like, pseudogene	1.30436	5.39435	8.55005	0.00790218	0.139831	2.46973
ENSMUSG00000002111	Spi1	20375	spleen focus forming virus (SFFV) proviral integration oncogene	-1.08534	7.05159	8.5479	0.00790885	0.139831	-2.12187
ENSMUSG00000032228	Tcf12	21406	transcription factor 12	-0.974048	6.68096	8.54488	0.00791821	0.139831	-1.96434
ENSMUSG00000015053	Gata2	14461	GATA binding protein 2	-9.23862	1.10535	8.7184	0.00792139	0.139831	-604.091
ENSMUSG00000056880	Gadl1	73748	glutamate decarboxylase-like 1	-5.20517	1.84837	8.52481	0.00798089	0.140697	-36.8904
ENSMUSG00000032599	Ip6k2	76500	inositol hexaphosphate kinase 2	-2.48527	2.89494	8.50701	0.00803691	0.141124	-5.59937
ENSMUSG00000046058	Eid2	386655	EP300 interacting inhibitor of differentiation 2	3.32785	2.46993	8.50469	0.00804424	0.141124	10.0411
ENSMUSG00000042447	Mios	252875	meiosis regulator for oocyte development	1.34514	4.68379	8.50306	0.00804941	0.141124	2.54055
ENSMUSG00000024130	Abca3	27410	ATP-binding cassette, sub-family A (ABC1), member 3	-0.898372	5.87789	8.5022	0.00805213	0.141124	-1.86396
ENSMUSG00000028943	Espn	56226	espin	-5.91574	0.192441	8.50013	0.00805867	0.141124	-60.3693
ENSMUSG00000041716	Gm20604	100859931	predicted gene 20604	-7.10149	1.8619	8.66871	0.00807201	0.141124	-137.329
ENSMUSG00000021222	Dcaf4	73828	DDB1 and CUL4 associated factor 4	3.19507	3.00073	8.4889	0.00809435	0.141124	9.15825
ENSMUSG00000017119	Nbr1	17966	NBR1, autophagy cargo receptor	0.726603	7.19675	8.48806	0.00809705	0.141124	1.65474
ENSMUSG00000029513	Prkab1	19079	protein kinase, AMP-activated, beta 1 non-catalytic subunit	-1.06826	6.07155	8.4874	0.00809916	0.141124	-2.09691
ENSMUSG00000039813	Tbc1d2	381605	TBC1 domain family, member 2	-8.01584	0.119041	8.75063	0.00813368	0.141454	-258.826
ENSMUSG00000026585	Kifap3	16579	kinesin-associated protein 3	2.30494	5.39699	8.47492	0.00813903	0.141454	4.94146
ENSMUSG00000042570	Mier2	70427	MIER family member 2	-2.94992	2.53982	8.46232	0.00817951	0.141974	-7.72707
ENSMUSG00000051166	Eml5	319670	echinoderm microtubule associated protein like 5	3.20399	3.31375	8.45437	0.00820517	0.142026	9.21506
ENSMUSG00000031129	Slc9a9	331004	solute carrier family 9 (sodium/hydrogen exchanger), member 9	-0.505455	8.055	8.45214	0.00821239	0.142026	-1.41957
ENSMUSG00000062115	Rai1	19377	retinoic acid induced 1	1.33987	4.88676	8.45163	0.00821406	0.142026	2.53129
ENSMUSG00000033597	Caskin1	268932	CASK interacting protein 1	-5.15769	0.708502	8.61889	0.00822625	0.142055	-35.696
ENSMUSG00000056592	Zfp658	210104	zinc finger protein 658	-1.0267	5.87864	8.43865	0.00825618	0.14239	-2.03736
ENSMUSG00000039983	Ccdc32	269336	coiled-coil domain containing 32	-2.71241	2.93574	8.42483	0.00830132	0.142626	-6.55414
ENSMUSG00000068966	Zbtb34	241311	zinc finger and BTB domain containing 34	0.499434	7.55035	8.42425	0.00830321	0.142626	1.41366
ENSMUSG00000026715	Serpinc1	11905	serine (or cysteine) peptidase inhibitor, clade C (antithrombin), member 1	5.88089	-0.104399	8.50039	0.00831697	0.142626	58.9284
ENSMUSG00000021376	Tpmt	22017	thiopurine methyltransferase	-5.50952	1.06911	8.41647	0.00832874	0.142626	-45.5545
ENSMUSG00000049904	Tmem17	103765	transmembrane protein 17	-8.26145	1.58516	8.5855	0.00833143	0.142626	-306.863
ENSMUSG00000032172	Olfm2	244723	olfactomedin 2	7.4959	-0.769691	8.79289	0.00835303	0.142626	180.506
ENSMUSG00000046707	Csnk2a2	13000	casein kinase 2, alpha prime polypeptide	-1.1996	5.50976	8.4084	0.00835533	0.142626	-2.29676
ENSMUSG00000008200	Fnbp4	55935	formin binding protein 4	0.814154	7.53327	8.40534	0.00836541	0.142626	1.75827
ENSMUSG00000042742	Bmt2	101148	base methyltransferase of 25S rRNA 2	-0.951995	6.45172	8.39813	0.00838927	0.142626	-1.93455
ENSMUSG00000044043	Pcdhb14	93885	protocadherin beta 14	7.92656	-0.129866	8.77731	0.00840062	0.142626	243.294
ENSMUSG00000037216	Lipt1	623661	lipoyltransferase 1	5.25765	1.1391	8.47268	0.00840694	0.142626	38.2569
ENSMUSG00000046879	Irgm1	15944	immunity-related GTPase family M member 1	1.10556	5.24269	8.39213	0.00840917	0.142626	2.15182
ENSMUSG00000018983	E2f2	242705	E2F transcription factor 2	-1.80635	4.1261	8.3916	0.00841095	0.142626	-3.49755
ENSMUSG00000072919	Noxred1	71275	NADP+ dependent oxidoreductase domain containing 1	7.68293	-0.538906	8.76965	0.00842416	0.142626	205.491
ENSMUSG00000032309	Fbxo22	71999	F-box protein 22	-0.996906	5.75669	8.3864	0.00842826	0.142626	-1.99572
ENSMUSG00000041658	Rragb	245670	Ras-related GTP binding B	-8.93914	0.394758	8.54026	0.00847638	0.14326	-490.851
ENSMUSG00000044452	Zfp507	668501	zinc finger protein 507	5.88263	0.61569	8.74863	0.00848906	0.143295	58.9994
ENSMUSG00000026395	Ptprc	19264	protein tyrosine phosphatase, receptor type, C	0.420714	9.66383	8.36275	0.00850742	0.143392	1.33859
ENSMUSG00000024406	Pou5f1	18999	POU domain, class 5, transcription factor 1	-7.15224	-0.644797	8.6235	0.00852868	0.143392	-142.245
ENSMUSG00000041540	Sox5	20678	SRY (sex determining region Y)-box 5	6.91046	0.141456	8.61769	0.00854724	0.143392	120.297
ENSMUSG00000020950	Foxg1	15228	forkhead box G1	7.60973	0.208439	8.61688	0.00854982	0.143392	195.324
ENSMUSG00000053929	Cyhr1	54151	cysteine and histidine rich 1	-1.16506	4.66887	8.34958	0.00855188	0.143392	-2.24242
ENSMUSG00000054383	Pnma1	70481	paraneoplastic antigen MA1	-7.71032	-0.241374	8.61417	0.00855852	0.143392	-209.43
ENSMUSG00000021557	Agtpbp1	67269	ATP/GTP binding protein 1	-1.10486	5.2348	8.34018	0.00858377	0.143538	-2.15078
ENSMUSG00000056698	Elmod3	232089	ELMO/CED-12 domain containing 3	-3.15225	3.40269	8.33707	0.00859435	0.143538	-8.89038
ENSMUSG00000060121	Gemin2	66603	gem nuclear organelle associated protein 2	-3.86284	2.70892	8.33567	0.00859913	0.143538	-14.5489
ENSMUSG00000021831	Ero1l	50527	ERO1-like (S. cerevisiae)	0.987392	5.59684	8.3286	0.00862323	0.143668	1.9826
ENSMUSG00000024968	Rcor2	104383	REST corepressor 2	-7.08087	0.457444	8.49239	0.00863282	0.143668	-135.38
ENSMUSG00000028599	Tnfrsf1b	21938	tumor necrosis factor receptor superfamily, member 1b	0.462045	8.31325	8.31146	0.00868201	0.143668	1.37749
ENSMUSG00000032534	Cep63	28135	centrosomal protein 63	-1.09416	6.19686	8.31081	0.00868422	0.143668	-2.13489
ENSMUSG00000021823	Vcl	22330	vinculin	-1.76887	4.20407	8.30823	0.00869314	0.143668	-3.40786
ENSMUSG00000028430	Nol6	230082	nucleolar protein family 6 (RNA-associated)	-1.32143	4.83942	8.30794	0.00869412	0.143668	-2.49914
ENSMUSG00000024817	Uhrf2	109113	ubiquitin-like, containing PHD and RING finger domains 2	0.910291	6.74048	8.30324	0.00871035	0.143668	1.87942
ENSMUSG00000074166	AW146154	101835	expressed sequence AW146154	2.15841	4.18016	8.29937	0.00872373	0.143668	4.46424
ENSMUSG00000051316	Taf7	24074	TATA-box binding protein associated factor 7	1.59475	5.41708	8.29524	0.00873802	0.143668	3.02043
ENSMUSG00000070643	Sox13	20668	SRY (sex determining region Y)-box 13	-5.93099	0.666018	8.29351	0.00874402	0.143668	-61.0105
ENSMUSG00000023224	Serping1	12258	serine (or cysteine) peptidase inhibitor, clade G, member 1	5.81313	-0.384623	8.36958	0.00875122	0.143668	56.2247
ENSMUSG00000037486	Asxl2	75302	additional sex combs like 2, transcriptional regulator	-0.593919	7.56189	8.28437	0.00877578	0.143668	-1.50934
ENSMUSG00000025764	Jade1	269424	jade family PHD finger 1	-1.5123	5.50435	8.2832	0.00877987	0.143668	-2.85265
ENSMUSG00000024213	Nudt3	56409	nudix (nucleotide diphosphate linked moiety X)-type motif 3	1.0502	5.42716	8.28261	0.00878192	0.143668	2.07081
ENSMUSG00000021890	Eaf1	74427	ELL associated factor 1	-1.17106	5.56939	8.2815	0.00878581	0.143668	-2.25177
ENSMUSG00000040016	Ptger3	19218	prostaglandin E receptor 3 (subtype EP3)	-4.74974	1.42192	8.28115	0.00878703	0.143668	-26.9038
ENSMUSG00000027500	Stmn2	20257	stathmin-like 2	8.32226	-0.217178	8.92352	0.00879294	0.143668	320.073
ENSMUSG00000062101	Zfp119b	240120	zinc finger protein 119b	3.78391	1.93007	8.2779	0.00879838	0.143668	13.7744
ENSMUSG00000055240	Zfp101	22643	zinc finger protein 101	-0.950862	5.38793	8.26661	0.00883789	0.144139	-1.93303
ENSMUSG00000038267	Slc22a23	73102	solute carrier family 22, member 23	2.63769	2.38785	8.25625	0.00887434	0.144559	6.22334
ENSMUSG00000074899	Sptbn5	640524	spectrin beta, non-erythrocytic 5	-4.48901	0.805002	8.2397	0.00893293	0.145338	-22.4558
ENSMUSG00000032415	Ube2cbp	70348	ubiquitin-conjugating enzyme E2C binding protein	7.66443	-0.592521	8.59759	0.00897243	0.145772	202.873
ENSMUSG00000085492	Trmt61b	68789	tRNA methyltransferase 61B	-3.47106	2.88275	8.2243	0.00898782	0.145772	-11.089
ENSMUSG00000048429	Timm29	69773	translocase of inner mitochondrial membrane 29	-2.00093	4.692	8.22313	0.00899201	0.145772	-4.00258
ENSMUSG00000014554	Dguok	27369	deoxyguanosine kinase	-1.80547	4.46865	8.21666	0.00901517	0.145915	-3.49543
ENSMUSG00000034557	Zfyve9	230597	zinc finger, FYVE domain containing 9	1.39294	5.23581	8.21464	0.00902244	0.145915	2.62614
ENSMUSG00000040771	Oard1	106821	O-acyl-ADP-ribose deacylase 1	-1.40089	5.19704	8.20368	0.00906189	0.146378	-2.64064
ENSMUSG00000045790	Ccdc149	100503884	coiled-coil domain containing 149	7.66497	0.261873	8.45413	0.00908873	0.146613	202.948
ENSMUSG00000051615	Rap2a	76108	RAS related protein 2a	-0.738039	7.32692	8.19165	0.00910543	0.146613	-1.66791
ENSMUSG00000022960	Donson	60364	downstream neighbor of SON	1.12451	4.92271	8.19067	0.009109	0.146613	2.18027
ENSMUSG00000038542	Pcid2	234069	PCI domain containing 2	1.81328	4.07045	8.18074	0.00914513	0.147019	3.5144
ENSMUSG00000018820	Zfyve27	319740	zinc finger, FYVE domain containing 27	-1.37479	5.10672	8.17144	0.00917908	0.147224	-2.59331
ENSMUSG00000037990	Sh3rf3	237353	SH3 domain containing ring finger 3	7.16848	-0.884829	8.53561	0.00917967	0.147224	143.856
ENSMUSG00000056429	Tgoln1	22134	trans-golgi network protein	-0.625186	8.18773	8.16737	0.00919399	0.147278	-1.54241
ENSMUSG00000032425	Zfp949	71640	zinc finger protein 949	-2.96781	3.57441	8.15756	0.00923007	0.147681	-7.82346
ENSMUSG00000097637	4933417D19Rik	71186	RIKEN cDNA 4933417D19 gene	-5.61352	0.0402591	8.1545	0.00924134	0.147686	-48.9594
ENSMUSG00000028274	Rngtt	24018	RNA guanylyltransferase and 5'-phosphatase	1.50166	5.36373	8.14702	0.00926898	0.147953	2.83168
ENSMUSG00000027204	Fbn1	14118	fibrillin 1	6.70183	-0.878196	8.50529	0.00928303	0.148002	104.1
ENSMUSG00000029119	Man2b2	17160	mannosidase 2, alpha B2	-0.873531	6.85856	8.13452	0.00931537	0.148164	-1.83214
ENSMUSG00000016637	Ift27	67042	intraflagellar transport 27	-6.07487	1.59338	8.13211	0.00932435	0.148164	-67.4089
ENSMUSG00000023909	Paqr4	76498	progestin and adipoQ receptor family member IV	-3.76948	1.74637	8.12919	0.0093352	0.148164	-13.6372
ENSMUSG00000036646	Man1b1	227619	mannosidase, alpha, class 1B, member 1	-1.25069	5.16144	8.12869	0.00933707	0.148164	-2.37956
ENSMUSG00000031015	Swap70	20947	SWA-70 protein	-0.932339	6.59301	8.12191	0.0093624	0.148357	-1.90837
ENSMUSG00000024695	Zfp91	109910	zinc finger protein 91	0.522647	7.24007	8.11957	0.00937117	0.148357	1.43659
ENSMUSG00000001604	Tcea3	21401	transcription elongation factor A (SII), 3	7.78987	-0.855056	8.73115	0.0094038	0.148699	221.301
ENSMUSG00000030298	Sec13	110379	SEC13 homolog, nuclear pore and COPII coat complex component	-1.20007	4.70657	8.10695	0.00941857	0.148758	-2.2975
ENSMUSG00000022476	Polr3h	78929	polymerase (RNA) III (DNA directed) polypeptide H	-4.87167	1.26111	8.10135	0.0094397	0.148764	-29.2765
ENSMUSG00000035382	Pcsk7	18554	proprotein convertase subtilisin/kexin type 7	1.73232	4.56159	8.10101	0.00944099	0.148764	3.32261
ENSMUSG00000051497	Kcnj16	16517	potassium inwardly-rectifying channel, subfamily J, member 16	-5.82357	3.39165	8.08656	0.00949572	0.149452	-56.6328
ENSMUSG00000048939	Atp13a5	268878	ATPase type 13A5	6.12924	0.7478	8.32368	0.00954824	0.150056	69.998
ENSMUSG00000033216	Eefsec	65967	eukaryotic elongation factor, selenocysteine-tRNA-specific	2.12236	3.36799	8.07053	0.00955689	0.150056	4.35407
ENSMUSG00000070304	Scn2b	72821	sodium channel, voltage-gated, type II, beta	3.66543	2.15476	8.06514	0.00957755	0.150056	12.6883
ENSMUSG00000008090	Fgfrl1	116701	fibroblast growth factor receptor-like 1	3.2144	2.12264	8.06252	0.0095876	0.150056	9.2818
ENSMUSG00000025979	Mob4	19070	MOB family member 4, phocein	-1.04982	6.07837	8.06135	0.00959208	0.150056	-2.07028
ENSMUSG00000015671	Psma2	19166	proteasome (prosome, macropain) subunit, alpha type 2	0.896209	5.94578	8.0591	0.00960076	0.150056	1.86117
ENSMUSG00000090369	4933411K16Rik	66765	RIKEN cDNA 4933411K16 gene	-8.3905	0.656919	8.20996	0.00962397	0.150245	-335.578
ENSMUSG00000057530	Ece1	230857	endothelin converting enzyme 1	-1.22845	5.42896	8.04579	0.0096521	0.15051	-2.34315
ENSMUSG00000040669	Phc1	13619	polyhomeotic 1	1.65888	4.84423	8.041	0.00967068	0.150626	3.15771
ENSMUSG00000024085	Man2a1	17158	mannosidase 2, alpha 1	0.89559	6.81183	8.03396	0.00969803	0.150878	1.86037
ENSMUSG00000036009	Mettl25	216292	methyltransferase like 25	1.85019	3.59586	8.01813	0.00975982	0.151388	3.60548
ENSMUSG00000074922	Fam122a	68034	family with sequence similarity 122, member A	-2.37549	3.33886	8.01761	0.00976185	0.151388	-5.18912
ENSMUSG00000011958	Bnip2	12175	BCL2/adenovirus E1B interacting protein 2	0.812054	7.53601	8.01295	0.00978015	0.151388	1.75571
ENSMUSG00000021590	Spata9	75571	spermatogenesis associated 9	5.45003	-0.474223	8.00674	0.00980456	0.151388	43.7142
ENSMUSG00000098428	Gm2260	100039484	predicted gene 2260	-3.81134	2.7035	8.00648	0.00980557	0.151388	-14.0388
ENSMUSG00000027342	Pcna	18538	proliferating cell nuclear antigen	0.777218	7.1796	8.00577	0.00980837	0.151388	1.71382
ENSMUSG00000025142	Aspscr1	68938	alveolar soft part sarcoma chromosome region, candidate 1 (human)	-1.35712	4.25524	8.00554	0.00980929	0.151388	-2.56173
ENSMUSG00000029229	Chic2	74277	cysteine-rich hydrophobic domain 2	-1.31334	5.5268	7.99915	0.0098345	0.151587	-2.48516
ENSMUSG00000066150	Slc31a1	20529	solute carrier family 31, member 1	-1.11576	6.61823	7.989	0.00987469	0.151587	-2.16709
ENSMUSG00000072949	Acot1	26897	acyl-CoA thioesterase 1	6.45678	-0.270078	8.23368	0.00988044	0.151587	87.8381
ENSMUSG00000033826	Dnah8	13417	dynein, axonemal, heavy chain 8	-8.07791	0.3115	8.23295	0.00988319	0.151587	-270.205
ENSMUSG00000013878	Rnf170	77733	ring finger protein 170	1.01917	5.65541	7.98577	0.00988752	0.151587	2.02676
ENSMUSG00000002981	Clptm1	56457	cleft lip and palate associated transmembrane protein 1	-0.677187	7.20593	7.98374	0.0098956	0.151587	-1.59902
ENSMUSG00000039735	Fnbp1l	214459	formin binding protein 1-like	1.34647	6.28362	7.98226	0.00990147	0.151587	2.5429
ENSMUSG00000043311	D17H6S53E	114585	DNA segment, Chr 17, human D6S53E	1.99499	3.48325	7.97722	0.00992157	0.151587	3.98614
ENSMUSG00000041708	Mpped1	223726	metallophosphoesterase domain containing 1	9.16684	0.212205	8.73561	0.0099232	0.151587	574.77
ENSMUSG00000032714	Syde1	71709	synapse defective 1, Rho GTPase, homolog 1 (C. elegans)	-5.79115	0.893974	7.95931	0.00999335	0.152486	-55.3745
ENSMUSG00000023495	Pcbp4	59092	poly(rC) binding protein 4	-5.89783	-0.524188	8.10774	0.0100135	0.152621	-59.6242
ENSMUSG00000075031	Hist1h2bb	319178	histone cluster 1, H2bb	-7.65062	-0.186629	8.09911	0.0100472	0.152812	-200.94
ENSMUSG00000082419	LOC102635048	102635048	60S ribosomal protein L12 pseudogene	-6.93176	-0.691253	8.09667	0.0100567	0.152812	-122.086
ENSMUSG00000046168	Kcnrg	328424	potassium channel regulator	3.44828	1.58152	7.94281	0.01006	0.152812	10.9153
ENSMUSG00000015120	Ube2i	22196	ubiquitin-conjugating enzyme E2I	0.55545	7.59558	7.92547	0.0101305	0.15371	1.46963
ENSMUSG00000072955	Tmsb15l	399591	thymosin beta 15b like	5.15347	-0.278568	7.99127	0.0101556	0.153919	35.5917
ENSMUSG00000074513	Arfip1	99889	ADP-ribosylation factor interacting protein 1	-1.60724	5.91945	7.911	0.0101897	0.154144	-3.04669
ENSMUSG00000092528	Nlrp1c-ps	627984	NLR family, pyrin domain containing 1C, pseudogene	-1.03986	6.23559	7.91014	0.0101933	0.154144	-2.05602
ENSMUSG00000074415	3110039I08Rik	73144	RIKEN cDNA 3110039I08 gene	7.16473	1.21006	8.1445	0.0102224	0.154411	143.483
ENSMUSG00000026822	Lcn2	16819	lipocalin 2	-2.11113	6.61248	7.89278	0.0102649	0.154765	-4.32029
ENSMUSG00000020785	Camkk1	55984	calcium/calmodulin-dependent protein kinase kinase 1, alpha	3.53547	3.05405	7.8916	0.0102698	0.154765	11.5953
ENSMUSG00000022219	Cideb	12684	cell death-inducing DNA fragmentation factor, alpha subunit-like effector B	-7.86468	-0.597503	8.12587	0.0102955	0.154765	-233.08
ENSMUSG00000038633	Degs1	13244	delta(4)-desaturase, sphingolipid 1	-0.717269	6.45229	7.8853	0.010296	0.154765	-1.64407
ENSMUSG00000027569	Mrgbp	73247	MRG/MORF4L binding protein	-2.01516	4.79229	7.88357	0.0103032	0.154765	-4.04226
ENSMUSG00000095930	Nim1k	245269	NIM1 serine/threonine protein kinase	-5.81451	0.457188	7.94568	0.0103412	0.155002	-56.2783
ENSMUSG00000089857	Zfp882	382019	zinc finger protein 882	-1.74018	4.65823	7.87429	0.0103419	0.155002	-3.34076
ENSMUSG00000026566	Mpzl1	68481	myelin protein zero-like 1	6.48773	-0.22141	8.10553	0.010376	0.155133	89.7434
ENSMUSG00000044708	Kcnj10	16513	potassium inwardly-rectifying channel, subfamily J, member 10	1.26602	5.63767	7.86553	0.0103786	0.155133	2.40498
ENSMUSG00000096904	Gm3591	100041958	predicted gene 3591	1.26389	6.07455	7.86398	0.0103851	0.155133	2.40142
ENSMUSG00000032235	Ice2	93697	interactor of little elongation complex ELL subunit 2	1.02606	6.01983	7.85994	0.010402	0.155134	2.03645
ENSMUSG00000015970	Chdh	218865	choline dehydrogenase	-4.2941	0.76421	7.85848	0.0104082	0.155134	-19.6179
ENSMUSG00000025572	Tmc6	217353	transmembrane channel-like gene family 6	1.37412	4.18791	7.85144	0.0104378	0.155405	2.59209
ENSMUSG00000025359	Pmel	20431	premelanosome protein	-7.65339	-0.546623	8.08641	0.0104524	0.15545	-201.326
ENSMUSG00000004897	Hdgf	15191	hepatoma-derived growth factor	1.27085	5.23658	7.84161	0.0104794	0.155575	2.41304
ENSMUSG00000096932	5033403F01Rik	75958	RIKEN cDNA 5033403F01 gene	4.8786	1.03174	7.84058	0.0104838	0.155575	29.4175
ENSMUSG00000044338	Aplnr	23796	apelin receptor	-8.03346	-0.260899	7.97703	0.0105375	0.155979	-262.007
ENSMUSG00000023826	Prkn	50873	parkin RBR E3 ubiquitin protein ligase	-4.13243	1.3295	7.82774	0.0105384	0.155979	-17.5382
ENSMUSG00000032786	Alas1	11655	aminolevulinic acid synthase 1	-1.28947	4.9141	7.82281	0.0105595	0.155979	-2.44439
ENSMUSG00000020515	Cnot8	69125	CCR4-NOT transcription complex, subunit 8	-1.36046	5.55602	7.82184	0.0105636	0.155979	-2.56767
ENSMUSG00000041930	Fam222a	433940	family with sequence similarity 222, member A	-4.43658	1.80136	7.8179	0.0105805	0.155979	-21.6542
ENSMUSG00000040054	Baz2a	116848	bromodomain adjacent to zinc finger domain, 2A	-0.768203	6.97376	7.81778	0.010581	0.155979	-1.70315
ENSMUSG00000028013	Ppa2	74776	pyrophosphatase (inorganic) 2	1.75166	3.69937	7.81524	0.0105919	0.155979	3.36747
ENSMUSG00000025147	Mob2	101513	MOB kinase activator 2	-3.06754	2.49586	7.81175	0.0106069	0.15603	-8.38341
ENSMUSG00000022422	Dscc1	72107	DNA replication and sister chromatid cohesion 1	-5.12215	0.555027	7.80097	0.0106533	0.156437	-34.8274
ENSMUSG00000063564	Col23a1	237759	collagen, type XXIII, alpha 1	-6.55807	-0.249167	7.94807	0.0106577	0.156437	-94.2273
ENSMUSG00000031586	Rbpms	19663	RNA binding protein gene with multiple splicing	1.24426	4.52218	7.78978	0.0107017	0.156912	2.36898
ENSMUSG00000029923	Rab19	19331	RAB19, member RAS oncogene family	4.76189	1.65786	7.77603	0.0107616	0.157258	27.1314
ENSMUSG00000000154	Slc22a18	18400	solute carrier family 22 (organic cation transporter), member 18	-7.89989	-0.164445	7.92333	0.0107616	0.157258	-238.838
ENSMUSG00000018412	Kansl1	76719	KAT8 regulatory NSL complex subunit 1	-0.511428	7.928	7.77464	0.0107676	0.157258	-1.42546
ENSMUSG00000033429	Mcee	73724	methylmalonyl CoA epimerase	-3.33904	2.61626	7.77367	0.0107719	0.157258	-10.1193
ENSMUSG00000021496	Pcbd2	72562	pterin 4 alpha carbinolamine dehydratase/dimerization cofactor of hepatocyte nuclear factor 1 alpha (TCF1) 2	2.36798	3.50805	7.76868	0.0107937	0.157389	5.16216
ENSMUSG00000037594	Clba1	217887	clathrin binding box of aftiphilin containing 1	-7.28923	-0.309666	8.00025	0.0108041	0.157389	-156.414
ENSMUSG00000034858	Fam214a	235493	family with sequence similarity 214, member A	-1.12303	4.76325	7.76073	0.0108286	0.157481	-2.17804
ENSMUSG00000031239	Itm2a	16431	integral membrane protein 2A	4.81181	2.13673	7.82892	0.0108338	0.157481	28.0865
ENSMUSG00000003438	Timm50	66525	translocase of inner mitochondrial membrane 50	-2.21419	3.05624	7.75631	0.0108481	0.157519	-4.64022
ENSMUSG00000067242	Lgi1	56839	leucine-rich repeat LGI family, member 1	5.59804	0.730914	7.81304	0.0109028	0.158143	48.4372
ENSMUSG00000025782	Taf3	209361	TATA-box binding protein associated factor 3	1.00957	5.22161	7.73975	0.0109213	0.158241	2.01331
ENSMUSG00000029328	Hnrnpdl	50926	heterogeneous nuclear ribonucleoprotein D-like	-0.590058	8.28235	7.7364	0.0109362	0.158287	-1.50531
ENSMUSG00000022323	Rida	15473	reactive intermediate imine deaminase A homolog	3.69433	2.56461	7.7334	0.0109495	0.158311	12.945
ENSMUSG00000030265	Kras	16653	Kirsten rat sarcoma viral oncogene homolog	-1.00102	6.72696	7.72961	0.0109664	0.158325	-2.00141
ENSMUSG00000037014	Sstr4	20608	somatostatin receptor 4	5.43991	-0.914539	7.87359	0.0109739	0.158325	43.4087
ENSMUSG00000030532	Hddc3	68695	HD domain containing 3	-5.42344	0.434555	7.86884	0.0109944	0.158451	-42.9159
ENSMUSG00000043391	2510009E07Rik	72190	RIKEN cDNA 2510009E07 gene	-0.923075	6.83493	7.71949	0.0110116	0.15853	-1.89615
ENSMUSG00000029066	Mrpl20	66448	mitochondrial ribosomal protein L20	-2.63755	2.54599	7.70867	0.0110602	0.158823	-6.22273
ENSMUSG00000030708	Dnajb13	69387	DnaJ heat shock protein family (Hsp40) member B13	3.16398	1.78058	7.70844	0.0110612	0.158823	8.96301
ENSMUSG00000027985	Lef1	16842	lymphoid enhancer binding factor 1	3.47802	1.2087	7.7055	0.0110745	0.158823	11.1426
ENSMUSG00000043664	Tmem221	434325	transmembrane protein 221	-4.0283	2.28382	7.70422	0.0110803	0.158823	-16.317
ENSMUSG00000027395	Polr1b	20017	polymerase (RNA) I polypeptide B	1.57498	4.20081	7.70189	0.0110908	0.158823	2.97932
ENSMUSG00000020823	Sec14l1	74136	SEC14-like lipid binding 1	-0.634863	8.21719	7.69646	0.0111153	0.158883	-1.55279
ENSMUSG00000011267	Zfp296	63872	zinc finger protein 296	-6.92687	-0.665849	7.92559	0.0111197	0.158883	-121.674
ENSMUSG00000025789	St8sia2	20450	ST8 alpha-N-acetyl-neuraminide alpha-2,8-sialyltransferase 2	8.09149	-0.49763	8.25626	0.0111303	0.158883	272.761
ENSMUSG00000031847	1700030J22Rik	69528	RIKEN cDNA 1700030J22 gene	-6.81	0.522254	7.83442	0.0111444	0.158893	-112.206
ENSMUSG00000026457	Adipor1	72674	adiponectin receptor 1	0.623139	7.20178	7.68781	0.0111545	0.158893	1.54022
ENSMUSG00000031149	Praf2	54637	PRA1 domain family 2	-2.4906	2.97901	7.68309	0.011176	0.159031	-5.62012
ENSMUSG00000040025	Ythdf2	213541	YTH N6-methyladenosine RNA binding protein 2	-1.05773	5.95973	7.67764	0.0112009	0.159217	-2.08166
ENSMUSG00000026835	Fcnb	14134	ficolin B	-8.94632	1.70775	7.89186	0.0112657	0.159643	-493.3
ENSMUSG00000089900	Tbc1d22bos	74092	TBC1 domain family, member 22B, opposite strand	-7.89564	-0.0894985	7.88655	0.0112889	0.159643	-238.136
ENSMUSG00000078653	Cntd1	68107	cyclin N-terminal domain containing 1	5.9606	0.93544	7.65816	0.0112901	0.159643	62.2758
ENSMUSG00000036615	Rfxap	170767	regulatory factor X-associated protein	-2.91801	3.40843	7.65124	0.0113221	0.159643	-7.55802
ENSMUSG00000002274	Metrn	70083	meteorin, glial cell differentiation regulator	-6.52254	-0.403938	7.79216	0.0113317	0.159643	-91.935
ENSMUSG00000024965	Fermt3	108101	fermitin family member 3	-0.974467	6.92078	7.6487	0.0113338	0.159643	-1.96491
ENSMUSG00000003423	Pih1d1	68845	PIH1 domain containing 1	2.81524	3.62798	7.64842	0.0113351	0.159643	7.03836
ENSMUSG00000041444	Arhgap32	330914	Rho GTPase activating protein 32	-1.50995	4.67441	7.64828	0.0113357	0.159643	-2.848
ENSMUSG00000050121	Opalin	226115	oligodendrocytic myelin paranodal and inner loop protein	6.45785	-0.37836	7.96972	0.0113431	0.159643	87.9037
ENSMUSG00000047976	Kcna1	16485	potassium voltage-gated channel, shaker-related subfamily, member 1	-6.95806	0.357471	7.78813	0.0113497	0.159643	-124.332
ENSMUSG00000084984	Far1os	69295	fatty acyl CoA reductase 1, opposite strand	4.23662	1.43119	7.63826	0.0113822	0.159643	18.8517
ENSMUSG00000020330	Hmmr	15366	hyaluronan mediated motility receptor (RHAMM)	1.57698	3.75589	7.63784	0.0113841	0.159643	2.98344
ENSMUSG00000020882	Cacnb1	12295	calcium channel, voltage-dependent, beta 1 subunit	-4.40493	0.669275	7.6368	0.011389	0.159643	-21.1844
ENSMUSG00000039262	Prrc2b	227723	proline-rich coiled-coil 2B	0.825886	7.51259	7.63522	0.0113964	0.159643	1.77262
ENSMUSG00000029530	Ccr9	12769	chemokine (C-C motif) receptor 9	-5.28714	0.862157	7.69277	0.0114415	0.159685	-39.0471
ENSMUSG00000022772	Senp5	320213	SUMO/sentrin specific peptidase 5	-1.33455	4.78897	7.62073	0.011464	0.159685	-2.52197
ENSMUSG00000040430	Pitpnc1	71795	phosphatidylinositol transfer protein, cytoplasmic 1	-0.75604	6.79982	7.62003	0.0114673	0.159685	-1.68885
ENSMUSG00000022752	Tomm70a	28185	translocase of outer mitochondrial membrane 70A	1.15122	5.93932	7.61884	0.0114728	0.159685	2.22102
ENSMUSG00000015837	Sqstm1	18412	sequestosome 1	0.888036	6.55828	7.61644	0.0114841	0.159685	1.85066
ENSMUSG00000085169	Gm10785	100038392	predicted gene 10785	6.15061	0.053052	7.61327	0.011499	0.159685	71.0423
ENSMUSG00000038702	Dsel	319901	dermatan sulfate epimerase-like	-2.75771	2.73868	7.6121	0.0115045	0.159685	-6.76323
ENSMUSG00000058600	Rpl30	19946	ribosomal protein L30	0.485558	7.74999	7.61095	0.0115099	0.159685	1.40013
ENSMUSG00000051184	Zfp524	66056	zinc finger protein 524	2.9661	1.9829	7.60764	0.0115254	0.159685	7.81422
ENSMUSG00000074884	Serf2	378702	small EDRK-rich factor 2	0.68189	6.84753	7.60641	0.0115313	0.159685	1.60424
ENSMUSG00000038598	AI481877	100155	expressed sequence AI481877	-8.07074	0.065374	7.83052	0.0115367	0.159685	-268.865
ENSMUSG00000013736	Trnt1	70047	tRNA nucleotidyl transferase, CCA-adding, 1	1.22631	5.21315	7.6043	0.0115412	0.159685	2.33968
ENSMUSG00000027722	Spata5	57815	spermatogenesis associated 5	1.31152	5.08102	7.59409	0.0115895	0.160189	2.48202
ENSMUSG00000033020	Polr2f	69833	polymerase (RNA) II (DNA directed) polypeptide F	-3.44404	2.04955	7.58377	0.0116385	0.160268	-10.8833
ENSMUSG00000027956	Tmem144	70652	transmembrane protein 144	1.21115	4.78328	7.58286	0.0116428	0.160268	2.31522
ENSMUSG00000022236	Ropn1l	252967	ropporin 1-like	-6.45603	-0.462365	7.80296	0.0116608	0.160268	-87.793
ENSMUSG00000097145	9230114K14Rik	414108	RIKEN cDNA 9230114K14 gene	4.34774	1.00376	7.57597	0.0116757	0.160268	20.3611
ENSMUSG00000024301	Kifc5b	16580	kinesin family member C5B	-7.56263	-0.00304033	7.71639	0.0116764	0.160268	-189.051
ENSMUSG00000026042	Col5a2	12832	collagen, type V, alpha 2	6.90984	-0.0409755	7.71164	0.0116983	0.160268	120.245
ENSMUSG00000022658	Tagln3	56370	transgelin 3	7.37259	0.801046	7.79453	0.0116991	0.160268	165.718
ENSMUSG00000011831	Evi5	14020	ecotropic viral integration site 5	0.694612	7.17881	7.57082	0.0117004	0.160268	1.61845
ENSMUSG00000040163	1700034J05Rik	73344	RIKEN cDNA 1700034J05 gene	-8.9613	0.716664	7.70972	0.0117073	0.160268	-498.447
ENSMUSG00000009418	Nav1	215690	neuron navigator 1	0.613693	6.77126	7.568	0.0117139	0.160268	1.53017
ENSMUSG00000028017	Egf	13645	epidermal growth factor	-6.65191	-0.049033	7.78698	0.0117335	0.160293	-100.56
ENSMUSG00000044288	Cnr1	12801	cannabinoid receptor 1 (brain)	9.00042	0.134433	8.10847	0.0117394	0.160293	512.15
ENSMUSG00000038250	Usp38	74841	ubiquitin specific peptidase 38	-0.845864	5.75868	7.55967	0.0117539	0.160329	-1.79734
ENSMUSG00000038416	Cdc16	69957	CDC16 cell division cycle 16	-1.45156	5.11726	7.55545	0.0117743	0.160359	-2.73503
ENSMUSG00000026353	Ubxn4	67812	UBX domain protein 4	0.582606	7.45108	7.54939	0.0118036	0.160359	1.49755
ENSMUSG00000017499	Cdc6	23834	cell division cycle 6	-8.11605	0.547952	7.68629	0.0118165	0.160359	-277.444
ENSMUSG00000028063	Lmna	16905	lamin A	-4.94975	0.693193	7.54589	0.0118205	0.160359	-30.9046
ENSMUSG00000017718	Afmid	71562	arylformamidase	-2.98804	2.54899	7.54584	0.0118208	0.160359	-7.93393
ENSMUSG00000040640	Erc2	238988	ELKS/RAB6-interacting/CAST family member 2	8.07177	-0.317578	8.08786	0.0118274	0.160359	269.057
ENSMUSG00000018796	Acsl1	14081	acyl-CoA synthetase long-chain family member 1	-0.900474	6.39175	7.53937	0.0118521	0.160373	-1.86668
ENSMUSG00000048108	Tmem72	319776	transmembrane protein 72	6.37994	-0.0141445	7.85221	0.0118613	0.160373	83.2823
ENSMUSG00000036218	Pdzrn4	239618	PDZ domain containing RING finger 4	6.66315	1.61507	7.75792	0.0118669	0.160373	101.347
ENSMUSG00000028683	Eif2b3	108067	eukaryotic translation initiation factor 2B, subunit 3	2.29511	4.72216	7.53188	0.0118886	0.160373	4.90793
ENSMUSG00000026159	Agfg1	15463	ArfGAP with FG repeats 1	-0.945361	4.93539	7.52756	0.0119097	0.160373	-1.92567
ENSMUSG00000020623	Map2k6	26399	mitogen-activated protein kinase kinase 6	2.25278	4.31914	7.5263	0.0119159	0.160373	4.766
ENSMUSG00000024926	Kat5	81601	K(lysine) acetyltransferase 5	1.35077	4.71406	7.52396	0.0119273	0.160373	2.55048
ENSMUSG00000028358	Zfp618	72701	zinc finger protein 618	-8.25976	0.0706183	7.66111	0.0119352	0.160373	-306.504
ENSMUSG00000038880	Mrps34	79044	mitochondrial ribosomal protein S34	3.5257	1.82982	7.51622	0.0119652	0.160373	11.517
ENSMUSG00000023216	Epb42	13828	erythrocyte membrane protein band 4.2	-7.856	-0.557387	8.05574	0.0119659	0.160373	-231.682
ENSMUSG00000039270	Megf9	230316	multiple EGF-like-domains 9	1.19159	5.49662	7.51538	0.0119694	0.160373	2.28404
ENSMUSG00000051611	Olfr112	258096	olfactory receptor 112	6.0485	-0.964598	7.82559	0.0119824	0.160373	66.1881
ENSMUSG00000003810	Mast2	17776	microtubule associated serine/threonine kinase 2	0.937989	4.95916	7.51264	0.0119829	0.160373	1.91586
ENSMUSG00000050796	B3galt6	117592	UDP-Gal:betaGal beta 1,3-galactosyltransferase, polypeptide 6	-3.31601	2.75382	7.5091	0.0120002	0.160447	-9.95909
ENSMUSG00000036186	Fam69b	56279	family with sequence similarity 69, member B	4.67491	0.139103	7.56787	0.0120325	0.160719	25.544
ENSMUSG00000036561	Ppp6r2	71474	protein phosphatase 6, regulatory subunit 2	-2.24613	3.72773	7.49895	0.0120504	0.160799	-4.74408
ENSMUSG00000040562	Gstm2	14863	glutathione S-transferase, mu 2	4.89097	0.8291	7.495	0.01207	0.160864	29.6708
ENSMUSG00000026904	Slc4a10	94229	solute carrier family 4, sodium bicarbonate cotransporter-like, member 10	4.79216	1.42974	7.49316	0.0120791	0.160864	27.7066
ENSMUSG00000022864	D16Ertd472e	67102	DNA segment, Chr 16, ERATO Doi 472, expressed	2.47583	3.63953	7.48027	0.0121432	0.161535	5.56288
ENSMUSG00000036162	Fam219aos	76992	family with sequence similarity 219, member A, opposite strand	-6.3932	-0.0468026	7.69675	0.0121534	0.161535	-84.0513
ENSMUSG00000068284	Usf3	207806	upstream transcription factor family member 3	-0.570137	7.62491	7.45867	0.0122516	0.162553	-1.48466
ENSMUSG00000041498	Kif14	381293	kinesin family member 14	-7.80141	-0.249535	7.59483	0.0122541	0.162553	-223.079
ENSMUSG00000026810	Dpm2	13481	dolichol-phosphate (beta-D) mannosyltransferase 2	-2.04261	4.62579	7.45464	0.012272	0.162631	-4.11989
ENSMUSG00000040118	Cacna2d1	12293	calcium channel, voltage-dependent, alpha2/delta subunit 1	6.78726	1.1606	7.75002	0.0123337	0.162938	110.451
ENSMUSG00000084997	Gm15471	100503157	predicted gene 15471	8.03177	-0.416426	7.65818	0.012338	0.162938	261.7
ENSMUSG00000035578	Iqcg	69707	IQ motif containing G	-4.59129	0.773949	7.50524	0.0123416	0.162938	-24.1055
ENSMUSG00000020077	Srgn	19073	serglycin	-0.699762	7.75916	7.44054	0.0123434	0.162938	-1.62424
ENSMUSG00000045005	Fzd5	14367	frizzled class receptor 5	1.44948	4.23509	7.43698	0.0123615	0.163017	2.73109
ENSMUSG00000039264	Gimap3	83408	GTPase, IMAP family member 3	-9.4383	0.7409	8.2606	0.0123843	0.163158	-693.765
ENSMUSG00000026572	Tbx19	83993	T-box 19	5.34143	-0.128569	7.49084	0.0124139	0.163389	40.5444
ENSMUSG00000042873	Lhfpl4	269788	lipoma HMGIC fusion partner-like protein 4	5.2673	0.788685	7.48598	0.0124384	0.163528	38.5137
ENSMUSG00000042097	Zfp239	22685	zinc finger protein 239	-7.91391	0.0781084	7.63439	0.0124535	0.163528	-241.171
ENSMUSG00000032251	Irak1bp1	65099	interleukin-1 receptor-associated kinase 1 binding protein 1	4.94455	1.02994	7.41579	0.01247	0.163528	30.7934
ENSMUSG00000059334	Zfp36l3	333473	zinc finger protein 36, C3H type-like 3	5.58841	-0.69381	7.72074	0.0124729	0.163528	48.1147
ENSMUSG00000073409	H2-Q6	110557	histocompatibility 2, Q region locus 6	1.03231	5.83922	7.41143	0.0124924	0.163625	2.04529
ENSMUSG00000037086	Prr32	68800	proline rich 32	7.56588	-0.561448	8.06544	0.0125321	0.163986	189.477
ENSMUSG00000022951	Rcan1	54720	regulator of calcineurin 1	0.992957	6.03463	7.40122	0.0125451	0.163997	1.99026
ENSMUSG00000021650	Ptcd2	68927	pentatricopeptide repeat domain 2	1.79689	3.81696	7.394	0.0125825	0.164057	3.47471
ENSMUSG00000041343	Ankrd42	73845	ankyrin repeat domain 42	3.6658	0.786632	7.45558	0.012593	0.164057	12.6916
ENSMUSG00000032959	Pebp1	23980	phosphatidylethanolamine binding protein 1	0.876764	6.19549	7.39138	0.0125961	0.164057	1.83625
ENSMUSG00000046006	Gapt	238875	Grb2-binding adaptor, transmembrane	-4.16877	2.45035	7.38939	0.0126065	0.164057	-17.9856
ENSMUSG00000041144	Dnah7b	227058	dynein, axonemal, heavy chain 7B	6.40281	0.0332442	7.69073	0.0126175	0.164057	84.6131
ENSMUSG00000033255	Gm5134	333669	predicted gene 5134	-4.93401	1.8764	7.38459	0.0126315	0.164057	-30.5693
ENSMUSG00000032816	Igdcc4	56741	immunoglobulin superfamily, DCC subclass, member 4	4.35688	1.52157	7.44743	0.0126347	0.164057	20.4904
ENSMUSG00000030086	Chchd6	66098	coiled-coil-helix-coiled-coil-helix domain containing 6	-7.72268	-0.0551821	7.51481	0.0126517	0.16412	-211.231
ENSMUSG00000044365	Cxxc4	319478	CXXC finger 4	8.16729	-0.301194	7.67321	0.0127028	0.164624	287.475
ENSMUSG00000038206	Fbxo8	50753	F-box protein 8	1.25445	4.27383	7.35972	0.012762	0.165233	2.38576
ENSMUSG00000050840	Cdh20	23836	cadherin 20	-6.2388	0.133125	7.56472	0.0127986	0.165469	-75.5205
ENSMUSG00000028602	Tnfrsf8	21941	tumor necrosis factor receptor superfamily, member 8	6.34449	-1.21469	7.65244	0.0128047	0.165469	81.2607
ENSMUSG00000034675	Dbn1	56320	drebrin 1	7.81232	0.406565	7.5602	0.0128214	0.165526	224.772
ENSMUSG00000037060	Cavin3	109042	caveolae associated 3	6.89061	-1.51377	8.56376	0.0128688	0.16598	118.653
ENSMUSG00000037989	Wnk2	75607	WNK lysine deficient protein kinase 2	5.9688	-1.08513	7.63575	0.0128873	0.166059	62.6308
ENSMUSG00000034345	Gtf2h5	66467	general transcription factor IIH, polypeptide 5	1.25598	4.18592	7.33164	0.0129111	0.166207	2.38829
ENSMUSG00000003153	Slc2a3	20527	solute carrier family 2 (facilitated glucose transporter), member 3	-1.09247	6.30394	7.32588	0.0129419	0.166445	-2.13238
ENSMUSG00000024302	Dtna	13527	dystrobrevin alpha	4.85759	2.95264	7.37272	0.0130252	0.16732	28.9922
ENSMUSG00000072694	1500011B03Rik	66236	RIKEN cDNA 1500011B03 gene	-3.88178	1.56207	7.30862	0.0130347	0.16732	-14.7411
ENSMUSG00000028974	Dffa	13347	DNA fragmentation factor, alpha subunit	-1.97778	4.44188	7.30285	0.0130659	0.167561	-3.93888
ENSMUSG00000074194	Zfp791	244556	zinc finger protein 791	-4.26613	1.71821	7.29965	0.0130833	0.167619	-19.2412
ENSMUSG00000058672	Tubb2a	22151	tubulin, beta 2A class IIA	1.27649	4.54201	7.29745	0.0130952	0.167619	2.42249
ENSMUSG00000022982	Sod1	20655	superoxide dismutase 1, soluble	-0.646643	7.16606	7.29458	0.0131108	0.167625	-1.56552
ENSMUSG00000041828	Abca8a	217258	ATP-binding cassette, sub-family A (ABC1), member 8a	-7.12152	-0.130191	7.42242	0.013129	0.167625	-139.249
ENSMUSG00000083674	Gm38402	171588	zinc finger protein pseudogene	5.59983	2.09144	7.28976	0.0131371	0.167625	48.4973
ENSMUSG00000022760	Thap7	69009	THAP domain containing 7	-3.98232	2.84914	7.28824	0.0131453	0.167625	-15.8051
ENSMUSG00000059586	Nsmce2	68501	NSE2/MMS21 homolog, SMC5-SMC6 complex SUMO ligase	1.40005	4.9856	7.28319	0.0131729	0.167718	2.63912
ENSMUSG00000042050	Wdr60	217935	WD repeat domain 60	-2.15833	3.72621	7.28234	0.0131775	0.167718	-4.46399
ENSMUSG00000054517	Trim65	338364	tripartite motif-containing 65	-0.888188	6.33929	7.27805	0.013201	0.167757	-1.85085
ENSMUSG00000042195	Slc35f2	72022	solute carrier family 35, member F2	-8.96915	0.382262	8.2536	0.0132271	0.167757	-501.169
ENSMUSG00000045589	Frrs1l	230235	ferric-chelate reductase 1 like	3.1675	1.04208	7.27327	0.0132272	0.167757	8.98487
ENSMUSG00000052915	Msl1	74026	male specific lethal 1	0.684689	8.32039	7.27271	0.0132303	0.167757	1.60736
ENSMUSG00000078817	Nlrp12	378425	NLR family, pyrin domain containing 12	-4.91878	2.65502	7.66325	0.0132488	0.16776	-30.2482
ENSMUSG00000086784	Isoc2a	664994	isochorismatase domain containing 2a	-4.37908	0.957446	7.26603	0.013267	0.16776	-20.8082
ENSMUSG00000028345	Tex10	269536	testis expressed gene 10	-1.59172	4.7803	7.26589	0.0132678	0.16776	-3.01408
ENSMUSG00000005864	Cnga2	12789	cyclic nucleotide gated channel alpha 2	5.79637	-0.769568	7.55727	0.0132837	0.167805	55.5752
ENSMUSG00000030077	Chl1	12661	cell adhesion molecule L1-like	4.88196	2.11372	7.25895	0.0133061	0.167931	29.4861
ENSMUSG00000025083	Afap1l2	226250	actin filament associated protein 1-like 2	-8.17925	0.283444	7.44956	0.013393	0.168869	-289.868
ENSMUSG00000029726	Mepce	231803	methylphosphate capping enzyme	-1.26992	4.65342	7.2383	0.0134208	0.168927	-2.41147
ENSMUSG00000032537	Ephb1	270190	Eph receptor B1	6.88347	-0.752799	7.52915	0.0134292	0.168927	118.068
ENSMUSG00000079415	Cntf	12803	ciliary neurotrophic factor	5.21377	0.531594	7.23347	0.0134477	0.168927	37.1108
ENSMUSG00000028128	F3	14066	coagulation factor III	3.9295	1.18524	7.23243	0.0134535	0.168927	15.2369
ENSMUSG00000031155	Pim2	18715	proviral integration site 2	2.2499	2.9318	7.23125	0.0134601	0.168927	4.75649
ENSMUSG00000032058	Ppp2r1b	73699	protein phosphatase 2, regulatory subunit A, beta	-0.929078	5.82821	7.21955	0.0135258	0.169563	-1.90406
ENSMUSG00000078157	4931440F15Rik	216622	RIKEN cDNA 4931440F15 gene	5.30334	0.987329	7.21601	0.0135458	0.169563	39.488
ENSMUSG00000025571	Tnrc6c	217351	trinucleotide repeat containing 6C	0.560182	6.97737	7.21518	0.0135504	0.169563	1.47446
ENSMUSG00000022529	Zfp263	74120	zinc finger protein 263	0.813505	6.2896	7.21329	0.0135611	0.169563	1.75748
ENSMUSG00000004936	Map2k1	26395	mitogen-activated protein kinase kinase 1	0.693868	6.46577	7.20641	0.0135999	0.169859	1.61761
ENSMUSG00000037966	Ninj1	18081	ninjurin 1	-1.77926	3.23659	7.20345	0.0136167	0.169859	-3.43249
ENSMUSG00000034254	Agpat1	55979	1-acylglycerol-3-phosphate O-acyltransferase 1 (lysophosphatidic acid acyltransferase, alpha)	-1.5972	5.23492	7.20245	0.0136224	0.169859	-3.02555
ENSMUSG00000032869	Psmf1	228769	proteasome (prosome, macropain) inhibitor subunit 1	1.37582	4.71064	7.19774	0.0136491	0.170035	2.59516
ENSMUSG00000050323	Ndufaf6	76947	NADH:ubiquinone oxidoreductase complex assembly factor 6	-4.29082	0.774719	7.19495	0.013665	0.170076	-19.5734
ENSMUSG00000010051	Hyal1	15586	hyaluronoglucosaminidase 1	-2.96538	2.5119	7.18804	0.0137044	0.170375	-7.81029
ENSMUSG00000018740	Slc25a35	71998	solute carrier family 25, member 35	2.01943	2.76026	7.18443	0.0137251	0.170375	4.05422
ENSMUSG00000047419	Cmya5	76469	cardiomyopathy associated 5	-1.26433	5.31639	7.1841	0.0137269	0.170375	-2.40216
ENSMUSG00000050530	Fam171a1	269233	family with sequence similarity 171, member A1	-6.65718	0.57244	7.3038	0.0137716	0.170773	-100.928
ENSMUSG00000047710	Champ1	101994	chromosome alignment maintaining phosphoprotein 1	1.16396	5.46905	7.17223	0.013795	0.170907	2.24071
ENSMUSG00000043419	Rnf227	80515	ring finger protein 227	-4.2779	1.48003	7.16832	0.0138176	0.171029	-19.3989
ENSMUSG00000021737	Psmd6	66413	proteasome (prosome, macropain) 26S subunit, non-ATPase, 6	-1.12183	5.70881	7.16431	0.0138406	0.171157	-2.17623
ENSMUSG00000029403	Cdkl2	53886	cyclin-dependent kinase-like 2 (CDC2-related kinase)	6.47937	-0.9327	7.36299	0.0138602	0.171225	89.2245
ENSMUSG00000006575	Rundc3a	51799	RUN domain containing 3A	-6.78088	-0.00792339	7.28592	0.0138714	0.171225	-109.963
ENSMUSG00000034023	Fancd2	211651	Fanconi anemia, complementation group D2	2.47388	2.89004	7.15166	0.0139139	0.171592	5.55537
ENSMUSG00000069633	Pex11g	69129	peroxisomal biogenesis factor 11 gamma	2.42659	3.74519	7.14023	0.0139804	0.172215	5.37623
ENSMUSG00000074874	Ctla2b	13025	cytotoxic T lymphocyte-associated protein 2 beta	1.24089	4.55612	7.13855	0.0139903	0.172215	2.36345
ENSMUSG00000034653	Ythdc2	240255	YTH domain containing 2	1.41129	5.4821	7.13642	0.0140027	0.172215	2.65975
ENSMUSG00000031256	Cstf2	108062	cleavage stimulation factor, 3' pre-RNA subunit 2	1.13539	5.14302	7.13002	0.0140402	0.172519	2.19678
ENSMUSG00000075478	Slitrk1	76965	SLIT and NTRK-like family, member 1	7.17624	-0.929464	7.40519	0.0140919	0.172997	144.632
ENSMUSG00000045598	Zfp553	233887	zinc finger protein 553	-1.79796	3.85266	7.11687	0.0141175	0.173155	-3.47728
ENSMUSG00000007207	Stx1a	20907	syntaxin 1A (brain)	-5.20816	0.508101	7.22806	0.0142002	0.173932	-36.9668
ENSMUSG00000068039	Tcp1	21454	t-complex protein 1	0.73209	7.20309	7.10158	0.0142081	0.173932	1.66104
ENSMUSG00000037997	Parp11	101187	poly (ADP-ribose) polymerase family, member 11	-2.1275	3.76732	7.09965	0.0142196	0.173932	-4.36959
ENSMUSG00000004994	Ccdc130	67736	coiled-coil domain containing 130	-2.82612	3.50267	7.08684	0.014296	0.174108	-7.09163
ENSMUSG00000073018	Gm1070	381785	predicted gene 1070	-7.4884	0.242647	7.20974	0.0143062	0.174108	-179.569
ENSMUSG00000092203	1110038B12Rik	68763	RIKEN cDNA 1110038B12 gene	-2.61199	4.13253	7.08311	0.0143184	0.174108	-6.11346
ENSMUSG00000035762	Tmem161b	72745	transmembrane protein 161B	1.80374	4.20479	7.08138	0.0143287	0.174108	3.49123
ENSMUSG00000021420	Fars2	69955	phenylalanine-tRNA synthetase 2 (mitochondrial)	3.64491	2.35644	7.08092	0.0143315	0.174108	12.5092
ENSMUSG00000026516	Nvl	67459	nuclear VCP-like	1.38461	4.97936	7.0809	0.0143316	0.174108	2.61101
ENSMUSG00000059142	Zfp945	240041	zinc finger protein 945	-1.63857	4.76065	7.07967	0.014339	0.174108	-3.11358
ENSMUSG00000020648	Dus4l	71916	dihydrouridine synthase 4-like (S. cerevisiae)	-4.08675	1.70119	7.07909	0.0143425	0.174108	-16.9916
ENSMUSG00000028952	Zbtb48	100090	zinc finger and BTB domain containing 48	-3.75886	2.61048	7.07784	0.01435	0.174108	-13.5372
ENSMUSG00000074136	4930513N10Rik	319960	RIKEN cDNA 4930513N10 gene	5.85629	-0.714261	7.3533	0.0143802	0.174318	57.9321
ENSMUSG00000025350	Rdh5	19682	retinol dehydrogenase 5	2.65734	2.48097	7.06237	0.0144433	0.174926	6.30867
ENSMUSG00000035849	Krt222	268481	keratin 222	-4.32847	0.831203	7.05631	0.01448	0.175076	-20.091
ENSMUSG00000042265	Trem1	58217	triggering receptor expressed on myeloid cells 1	-1.78873	5.25158	7.05605	0.0144816	0.175076	-3.4551
ENSMUSG00000022677	Fopnl	66086	Fgfr1op N-terminal like	-1.70556	4.3842	7.04779	0.0145319	0.175526	-3.26155
ENSMUSG00000019763	Rmnd1	66084	required for meiotic nuclear division 1 homolog	1.03841	6.12125	7.03784	0.0145927	0.175936	2.05397
ENSMUSG00000024892	Pcx	18563	pyruvate carboxylase	4.23783	0.443959	7.03748	0.0145948	0.175936	18.8674
ENSMUSG00000067942	Zfp160	224585	zinc finger protein 160	1.25724	5.18304	7.03584	0.0146049	0.175936	2.39037
ENSMUSG00000023988	Bysl	53414	bystin-like	1.54477	3.81113	7.03011	0.01464	0.176043	2.91758
ENSMUSG00000029925	Tbxas1	21391	thromboxane A synthase 1, platelet	0.46093	8.0016	7.02951	0.0146438	0.176043	1.37643
ENSMUSG00000037740	Mrps26	99045	mitochondrial ribosomal protein S26	1.52115	3.3264	7.02803	0.0146529	0.176043	2.8702
ENSMUSG00000091780	Sco2	100126824	SCO2 cytochrome c oxidase assembly protein	-5.17923	0.679804	7.02376	0.0146791	0.176074	-36.233
ENSMUSG00000066129	Kndc1	76484	kinase non-catalytic C-lobe domain (KIND) containing 1	5.83992	-0.0899189	7.08138	0.0146815	0.176074	57.2785
ENSMUSG00000027075	Slc43a1	72401	solute carrier family 43, member 1	-6.52327	1.27138	7.14257	0.0147022	0.17614	-91.9813
ENSMUSG00000029458	Brap	72399	BRCA1 associated protein	-0.856633	5.65311	7.01826	0.0147131	0.17614	-1.81081
ENSMUSG00000050229	Pigm	67556	phosphatidylinositol glycan anchor biosynthesis, class M	0.816552	6.74642	7.01102	0.0147579	0.176294	1.76119
ENSMUSG00000051518	Rps19bp1	66538	ribosomal protein S19 binding protein 1	2.85034	2.64676	7.01051	0.014761	0.176294	7.21168
ENSMUSG00000042364	Snx18	170625	sorting nexin 18	0.608989	8.91626	7.00984	0.0147652	0.176294	1.52519
ENSMUSG00000030986	Dhx32	101437	DEAH (Asp-Glu-Ala-His) box polypeptide 32	1.32932	4.26752	7.00391	0.014802	0.176493	2.51284
ENSMUSG00000038822	Hace1	209462	HECT domain and ankyrin repeat containing, E3 ubiquitin protein ligase 1	-1.41435	5.12142	7.00172	0.0148156	0.176493	-2.6654
ENSMUSG00000073424	Cyp4f15	106648	cytochrome P450, family 4, subfamily f, polypeptide 15	-7.49005	-0.0408207	7.19485	0.014821	0.176493	-179.775
ENSMUSG00000010914	Pdhx	27402	pyruvate dehydrogenase complex, component X	-1.73345	4.74963	6.99405	0.0148635	0.176776	-3.32523
ENSMUSG00000028673	Fuca1	71665	fucosidase, alpha-L- 1, tissue	0.574282	7.19917	6.99286	0.0148709	0.176776	1.48894
ENSMUSG00000025580	Eif4a3	192170	eukaryotic translation initiation factor 4A3	0.858913	5.87287	6.98992	0.0148893	0.176838	1.81367
ENSMUSG00000057182	Scn3a	20269	sodium channel, voltage-gated, type III, alpha	9.39701	0.529492	8.35317	0.0149305	0.177172	674.189
ENSMUSG00000034707	Gns	75612	glucosamine (N-acetyl)-6-sulfatase	0.362059	9.9218	6.97914	0.014957	0.17733	1.28526
ENSMUSG00000087475	4933406I18Rik	71045	RIKEN cDNA 4933406I18 gene	3.91188	0.554339	6.9713	0.0150064	0.177522	15.052
ENSMUSG00000040621	Gemin8	237221	gem nuclear organelle associated protein 8	-4.53444	2.55183	6.9709	0.015009	0.177522	-23.174
ENSMUSG00000024645	Timm21	67105	translocase of inner mitochondrial membrane 21	-1.99665	4.28229	6.97033	0.0150126	0.177522	-3.99071
ENSMUSG00000044465	Fam160a2	74349	family with sequence similarity 160, member A2	-1.69354	4.88044	6.96605	0.0150396	0.177656	-3.23449
ENSMUSG00000018068	Ints2	70422	integrator complex subunit 2	1.42186	5.28829	6.96437	0.0150502	0.177656	2.67931
ENSMUSG00000027520	Zdbf2	73884	zinc finger, DBF-type containing 2	7.63728	-0.55492	7.23447	0.0150659	0.177686	199.091
ENSMUSG00000054277	Arfgap3	66251	ADP-ribosylation factor GTPase activating protein 3	2.37563	3.24611	6.95858	0.015087	0.17774	5.18961
ENSMUSG00000027977	Ndst3	83398	N-deacetylase/N-sulfotransferase (heparan glucosaminyl) 3	7.583	-0.821784	7.22926	0.0150969	0.17774	191.74
ENSMUSG00000038406	Scaf1	233208	SR-related CTD-associated factor 1	1.48167	5.26888	6.95127	0.0151335	0.178017	2.79272
ENSMUSG00000096255	Dynlt1b	21648	dynein light chain Tctex-type 1B	-1.29712	4.49262	6.9488	0.0151493	0.17802	-2.45738
ENSMUSG00000005505	Kbtbd4	67136	kelch repeat and BTB (POZ) domain containing 4	-1.92137	3.25209	6.94709	0.0151602	0.17802	-3.78782
ENSMUSG00000033377	Palmd	114301	palmdelphin	-8.03949	0.561071	7.12632	0.015234	0.178732	-263.104
ENSMUSG00000026442	Nfasc	269116	neurofascin	-4.15991	2.40303	6.93279	0.0152519	0.178786	-17.8755
ENSMUSG00000031774	Fam192a	102122	family with sequence similarity 192, member A	-1.71587	4.78494	6.92425	0.0153069	0.179275	-3.28494
ENSMUSG00000026249	Serpine2	20720	serine (or cysteine) peptidase inhibitor, clade E, member 2	0.533247	8.48754	6.92148	0.0153248	0.179329	1.44718
ENSMUSG00000026601	Axdnd1	77352	axonemal dynein light chain domain containing 1	3.01978	1.4972	6.91502	0.0153666	0.179663	8.11044
ENSMUSG00000061718	Ppp1r1b	19049	protein phosphatase 1, regulatory inhibitor subunit 1B	-6.67761	0.480002	7.10238	0.0153813	0.179679	-102.367
ENSMUSG00000042251	Pm20d1	212933	peptidase M20 domain containing 1	-8.15772	0.287335	7.09097	0.015452	0.180083	-285.574
ENSMUSG00000019494	Cops6	26893	COP9 signalosome subunit 6	1.03694	5.28324	6.90165	0.0154536	0.180083	2.05187
ENSMUSG00000027799	Nbea	26422	neurobeachin	1.17628	6.21148	6.9013	0.0154558	0.180083	2.25993
ENSMUSG00000085408	C530005A16Rik	654318	RIKEN cDNA C530005A16 gene	-5.14456	1.41658	6.89912	0.0154701	0.180093	-35.3726
ENSMUSG00000049241	Hcar1	243270	hydrocarboxylic acid receptor 1	-8.58746	0.353407	7.0833	0.0154998	0.180284	-384.665
ENSMUSG00000055371	Stam2	56324	signal transducing adaptor molecule (SH3 domain and ITAM motif) 2	1.05468	5.87303	6.88481	0.0155639	0.180473	2.07726
ENSMUSG00000058706	0610030E20Rik	68364	RIKEN cDNA 0610030E20 gene	-0.825079	6.38579	6.88305	0.0155755	0.180473	-1.77163
ENSMUSG00000036430	Tbcc	72726	tubulin-specific chaperone C	3.29537	1.70828	6.88016	0.0155945	0.180473	9.81761
ENSMUSG00000021087	Rtn1	104001	reticulon 1	0.776678	6.92464	6.87996	0.0155959	0.180473	1.71318
ENSMUSG00000024563	Smad2	17126	SMAD family member 2	0.917016	6.76683	6.87959	0.0155983	0.180473	1.88821
ENSMUSG00000074238	Ap1ar	211556	adaptor-related protein complex 1 associated regulatory protein	1.58237	5.08308	6.87733	0.0156132	0.180473	2.99462
ENSMUSG00000024232	Bambi	68010	BMP and activin membrane-bound inhibitor	-4.78516	1.58951	6.87723	0.0156139	0.180473	-27.5726
ENSMUSG00000017686	Rhot1	59040	ras homolog family member T1	-0.987484	6.53174	6.87584	0.015623	0.180473	-1.98272
ENSMUSG00000028158	Mttp	17777	microsomal triglyceride transfer protein	2.79411	2.43795	6.85865	0.015737	0.181635	6.93602
ENSMUSG00000026888	Grb14	50915	growth factor receptor bound protein 14	-7.76981	-0.309173	7.04262	0.015756	0.181699	-218.246
ENSMUSG00000026200	Glb1l	74577	galactosidase, beta 1-like	1.55694	4.84978	6.84774	0.0158099	0.182165	2.94228
ENSMUSG00000030670	Cyp2r1	244209	cytochrome P450, family 2, subfamily r, polypeptide 1	-2.51273	2.62858	6.84243	0.0158455	0.182392	-5.70697
ENSMUSG00000045867	Cradd	12905	CASP2 and RIPK1 domain containing adaptor with death domain	-2.39704	2.69714	6.84076	0.0158567	0.182392	-5.26722
ENSMUSG00000029238	Clock	12753	circadian locomotor output cycles kaput	-0.752155	6.79711	6.83857	0.0158714	0.182406	-1.68431
ENSMUSG00000048814	Lonrf2	381338	LON peptidase N-terminal domain and ring finger 2	6.30585	0.127474	6.88744	0.015914	0.18265	79.1131
ENSMUSG00000057113	Npm1	18148	nucleophosmin 1	0.490985	8.53646	6.82948	0.0159326	0.18265	1.4054
ENSMUSG00000033910	Gucy1a1	60596	guanylate cyclase 1, soluble, alpha 1	6.54979	0.992587	7.01492	0.0159332	0.18265	93.6878
ENSMUSG00000079671	2610203C22Rik	72481	RIKEN cDNA 2610203C22 gene	-1.4045	5.06309	6.82602	0.015956	0.182757	-2.64725
ENSMUSG00000016503	Gtf3a	66596	general transcription factor III A	-1.18976	4.32812	6.81303	0.0160441	0.18361	-2.28115
ENSMUSG00000051950	B3glct	381694	beta-3-glucosyltransferase	-1.71689	4.84832	6.80558	0.0160949	0.184035	-3.28727
ENSMUSG00000042569	Dhrs7b	216820	dehydrogenase/reductase (SDR family) member 7B	1.46797	4.37905	6.79816	0.0161456	0.184378	2.76633
ENSMUSG00000022684	Bfar	67118	bifunctional apoptosis regulator	1.05118	5.94234	6.79445	0.0161711	0.184378	2.07222
ENSMUSG00000087385	Frg2f1	433752	FSHD region gene 2 family member 1	-4.66291	1.81583	6.79338	0.0161784	0.184378	-25.3324
ENSMUSG00000030051	Aplf	72103	aprataxin and PNKP like factor	-2.08691	2.99893	6.79216	0.0161868	0.184378	-4.24838
ENSMUSG00000034613	Ppm1h	319468	protein phosphatase 1H (PP2C domain containing)	0.469532	7.67597	6.79019	0.0162003	0.184378	1.38466
ENSMUSG00000025280	Polr3a	218832	polymerase (RNA) III (DNA directed) polypeptide A	-1.48009	5.13703	6.78926	0.0162068	0.184378	-2.78965
ENSMUSG00000040412	5330417C22Rik	229722	RIKEN cDNA 5330417C22 gene	6.12033	-1.35769	6.96675	0.0162466	0.18452	69.5668
ENSMUSG00000067591	Klra3	16634	killer cell lectin-like receptor, subfamily A, member 3	5.65476	-0.274589	7.48181	0.0162553	0.18452	50.3795
ENSMUSG00000040899	Ccr6	12458	chemokine (C-C motif) receptor 6	4.79297	-0.346188	6.96468	0.0162603	0.18452	27.7223
ENSMUSG00000023032	Slc4a8	59033	solute carrier family 4 (anion exchanger), member 8	6.05547	-0.607652	6.95662	0.0163134	0.184968	66.5088
ENSMUSG00000023106	Denr	68184	density-regulated protein	2.33377	4.71139	6.77028	0.0163379	0.18509	5.04119
ENSMUSG00000062380	Tubb3	22152	tubulin, beta 3 class III	6.40803	-0.662482	6.94832	0.0163684	0.18528	84.9201
ENSMUSG00000032609	Klhdc8b	78267	kelch domain containing 8B	-2.60613	3.16715	6.75999	0.0164096	0.18559	-6.0887
ENSMUSG00000053963	Stum	381310	mechanosensory transduction mediator	7.30838	0.0580547	6.93913	0.0164295	0.18566	158.505
ENSMUSG00000003660	Snrnp200	320632	small nuclear ribonucleoprotein 200 (U5)	-0.602615	7.34045	6.75227	0.0164635	0.185889	-1.51847
ENSMUSG00000031537	Ikbkb	16150	inhibitor of kappaB kinase beta	0.581293	7.99643	6.74846	0.0164902	0.185975	1.49619
ENSMUSG00000028528	Dnajc6	72685	DnaJ heat shock protein family (Hsp40) member C6	7.09173	0.077475	6.92807	0.0165034	0.185975	136.403
ENSMUSG00000031574	Star	20845	steroidogenic acute regulatory protein	-5.3862	2.0247	6.7453	0.0165124	0.185975	-41.8222
ENSMUSG00000007833	Aldh16a1	69748	aldehyde dehydrogenase 16 family, member A1	1.81814	4.10447	6.74308	0.016528	0.185995	3.52625
ENSMUSG00000074890	Lcmt2	329504	leucine carboxyl methyltransferase 2	-1.76275	3.67133	6.73552	0.0165812	0.186387	-3.39343
ENSMUSG00000037570	Mcrs1	51812	microspherule protein 1	-2.19665	3.21832	6.73422	0.0165904	0.186387	-4.58414
ENSMUSG00000024976	Shoc2	56392	Shoc2, leucine rich repeat scaffold protein	0.610251	7.25573	6.72808	0.0166338	0.186719	1.52652
ENSMUSG00000089736	Tgfbr3l	100044509	transforming growth factor, beta receptor III-like	4.08183	-0.156729	6.72508	0.0166551	0.186803	16.9338
ENSMUSG00000025417	Pip4k2c	117150	phosphatidylinositol-5-phosphate 4-kinase, type II, gamma	1.01149	5.63939	6.71931	0.0166961	0.186993	2.016
ENSMUSG00000047875	Gpr157	269604	G protein-coupled receptor 157	1.19459	5.77306	6.71852	0.0167017	0.186993	2.2888
ENSMUSG00000046873	Mbtps2	270669	membrane-bound transcription factor peptidase, site 2	0.719793	6.29684	6.71685	0.0167136	0.186993	1.64695
ENSMUSG00000029007	Agtrap	11610	angiotensin II, type I receptor-associated protein	-1.4425	4.50586	6.71142	0.0167523	0.187271	-2.71791
ENSMUSG00000074793	Hspa12b	72630	heat shock protein 12B	-7.2835	0.635949	6.81267	0.0168342	0.187906	-155.795
ENSMUSG00000021848	Otx2	18424	orthodenticle homeobox 2	-7.45149	0.078213	6.87881	0.016837	0.187906	-175.034
ENSMUSG00000024558	Mapk4	225724	mitogen-activated protein kinase 4	-7.26253	0.0591252	6.8748	0.0168644	0.188057	-153.546
ENSMUSG00000030706	Mrpl48	52443	mitochondrial ribosomal protein L48	-1.03364	5.78591	6.68665	0.0169302	0.188635	-2.04718
ENSMUSG00000038793	Lefty1	13590	left right determination factor 1	-5.78366	1.0648	6.7893	0.0169979	0.189119	-55.0876
ENSMUSG00000001829	Clpb	20480	ClpB caseinolytic peptidase B	2.41178	3.13214	6.67678	0.0170017	0.189119	5.32132
ENSMUSG00000024101	Washc1	68767	WASH complex subunit 1	-1.31395	4.38444	6.67404	0.0170216	0.189179	-2.48622
ENSMUSG00000097052	Snora43	100306955	small nucleolar RNA, H/ACA box 43	-3.763	2.86324	6.67218	0.0170351	0.189179	-13.5761
ENSMUSG00000054893	Zfp667	384763	zinc finger protein 667	-3.75877	3.16401	6.66814	0.0170645	0.18935	-13.5363
ENSMUSG00000032897	Nfyc	18046	nuclear transcription factor-Y gamma	-1.59106	3.84655	6.66029	0.0171218	0.18973	-3.01271
ENSMUSG00000027932	Slc27a3	26568	solute carrier family 27 (fatty acid transporter), member 3	-4.009	0.590395	6.65895	0.0171316	0.18973	-16.1001
ENSMUSG00000008763	Man1a2	17156	mannosidase, alpha, class 1A, member 2	0.640888	8.54001	6.6571	0.0171451	0.18973	1.55929
ENSMUSG00000022668	Gtpbp8	66067	GTP-binding protein 8 (putative)	1.98791	4.72596	6.65392	0.0171684	0.18973	3.96662
ENSMUSG00000070576	Mn1	433938	meningioma 1	5.97097	-0.621719	6.90303	0.0171826	0.18973	62.7249
ENSMUSG00000071984	Fndc1	68655	fibronectin type III domain containing 1	6.97386	-0.677098	6.90151	0.0171931	0.18973	125.702
ENSMUSG00000058812	0610039K10Rik	68386	RIKEN cDNA 0610039K10 gene	3.93371	1.20483	6.65002	0.0171971	0.18973	15.2815
ENSMUSG00000030101	Sumf1	58911	sulfatase modifying factor 1	0.681252	7.24218	6.64732	0.017217	0.189794	1.60353
ENSMUSG00000022299	Slc25a32	69906	solute carrier family 25, member 32	-2.14958	4.53192	6.64226	0.0172542	0.189881	-4.43697
ENSMUSG00000023286	Ube2j2	140499	ubiquitin-conjugating enzyme E2J 2	-1.33986	4.27024	6.64194	0.0172566	0.189881	-2.53128
ENSMUSG00000074004	B3gnt6	272411	UDP-GlcNAc:betaGal beta-1,3-N-acetylglucosaminyltransferase 6 (core 3 synthase)	-6.83735	-1.24222	6.81691	0.017267	0.189881	-114.353
ENSMUSG00000039967	Zfp292	30046	zinc finger protein 292	0.602872	8.19544	6.6303	0.0173427	0.190411	1.51874
ENSMUSG00000058670	4932411N23Rik	237029	RIKEN cDNA 4932411N23 gene	4.20842	-1.21003	6.62995	0.0173453	0.190411	18.4868
ENSMUSG00000015468	Notch4	18132	notch 4	-1.72912	3.16978	6.62831	0.0173575	0.190411	-3.31525
ENSMUSG00000049960	Mrps16	66242	mitochondrial ribosomal protein S16	3.2729	1.41076	6.62362	0.0173923	0.190459	9.66587
ENSMUSG00000041954	Tnfrsf18	21936	tumor necrosis factor receptor superfamily, member 18	-4.80313	2.47278	6.67555	0.0173945	0.190459	-27.9181
ENSMUSG00000024319	Vps52	224705	VPS52 GARP complex subunit	1.15663	4.73247	6.62088	0.0174128	0.190459	2.22936
ENSMUSG00000037316	Bag4	67384	BCL2-associated athanogene 4	-1.89713	3.6012	6.62013	0.0174183	0.190459	-3.7247
ENSMUSG00000037405	Icam1	15894	intercellular adhesion molecule 1	0.938298	6.30319	6.61691	0.0174424	0.190568	1.91627
ENSMUSG00000020108	Ddit4	74747	DNA-damage-inducible transcript 4	1.93339	3.07571	6.60936	0.0174988	0.19103	3.81952
ENSMUSG00000016319	Slc25a5	11740	solute carrier family 25 (mitochondrial carrier, adenine nucleotide translocator), member 5	-0.670487	6.85629	6.60458	0.0175347	0.191267	-1.59161
ENSMUSG00000024188	Luc7l	66978	Luc7-like	0.820523	6.28933	6.60016	0.017568	0.191475	1.76605
ENSMUSG00000022351	Sqle	20775	squalene epoxidase	-1.72561	3.41128	6.5964	0.0175962	0.191629	-3.30721
ENSMUSG00000073414	Mpig6b	106722	megakaryocyte and platelet inhibitory receptor G6b	-6.82798	-0.42216	6.75997	0.0176735	0.19205	-113.613
ENSMUSG00000093628	Gm20616	102638259	predicted gene 20616	5.36229	0.0619725	6.58519	0.017681	0.19205	41.135
ENSMUSG00000034616	Ssh3	245857	slingshot protein phosphatase 3	2.03673	3.35909	6.58042	0.0177172	0.19205	4.10316
ENSMUSG00000058013	2019-09-11	52398	septin 11	1.11275	5.55842	6.57978	0.0177221	0.19205	2.16257
ENSMUSG00000038816	Ctnnal1	54366	catenin (cadherin associated protein), alpha-like 1	-1.78504	4.88434	6.57812	0.0177347	0.19205	-3.44628
ENSMUSG00000040035	Disp2	214240	dispatched RND tramsporter family member 2	-7.13186	-0.827288	6.90111	0.0177738	0.19205	-140.25
ENSMUSG00000058594	Fbh1	50755	F-box DNA helicase 1	-1.26342	5.42812	6.57083	0.0177903	0.19205	-2.40064
ENSMUSG00000026739	Bmi1	12151	Bmi1 polycomb ring finger oncogene	0.833378	5.73758	6.56961	0.0177996	0.19205	1.78185
ENSMUSG00000030203	Dusp16	70686	dual specificity phosphatase 16	0.964918	6.22506	6.56845	0.0178084	0.19205	1.95195
ENSMUSG00000028020	Glrb	14658	glycine receptor, beta subunit	5.3676	-0.358633	6.81278	0.0178159	0.19205	41.2865
ENSMUSG00000021038	Vipas39	104799	VPS33B interacting protein, apical-basolateral polarity regulator, spe-39 homolog	-1.24229	4.76584	6.56632	0.0178247	0.19205	-2.36574
ENSMUSG00000035509	Fbxl21	213311	F-box and leucine-rich repeat protein 21	-3.51117	1.47201	6.56456	0.0178382	0.19205	-11.4016
ENSMUSG00000022361	Zhx1	22770	zinc fingers and homeoboxes 1	0.602008	6.8507	6.56298	0.0178503	0.19205	1.51783
ENSMUSG00000027752	Exosc8	69639	exosome component 8	1.12822	5.14654	6.56262	0.017853	0.19205	2.18589
ENSMUSG00000068011	Mkrn2os	70291	makorin, ring finger protein 2, opposite strand	-6.42935	1.31885	6.56149	0.0178617	0.19205	-86.1843
ENSMUSG00000027014	Cwc22	80744	CWC22 spliceosome-associated protein	-1.27053	5.34829	6.56139	0.0178625	0.19205	-2.41251
ENSMUSG00000038280	Ostm1	14628	osteopetrosis associated transmembrane protein 1	1.26456	5.82085	6.55903	0.0178806	0.192091	2.40255
ENSMUSG00000054309	Cpsf3	54451	cleavage and polyadenylation specificity factor 3	0.886659	6.56624	6.55551	0.0179076	0.192144	1.84889
ENSMUSG00000061461	Smim20	66278	small integral membrane protein 20	2.27509	3.95067	6.5547	0.0179139	0.192144	4.84027
ENSMUSG00000034177	Rnf43	207742	ring finger protein 43	6.83306	-0.834207	7.07481	0.0179767	0.192277	114.014
ENSMUSG00000010142	Tnfrsf13b	57916	tumor necrosis factor receptor superfamily, member 13b	0.764328	6.48784	6.54624	0.0179791	0.192277	1.69858
ENSMUSG00000073639	Rab18	19330	RAB18, member RAS oncogene family	-1.31512	5.58302	6.54601	0.0179809	0.192277	-2.48824
ENSMUSG00000079658	Eloc	67923	elongin C	0.970016	5.35565	6.5457	0.0179833	0.192277	1.95886
ENSMUSG00000021136	Smoc1	64075	SPARC related modular calcium binding 1	-6.63788	-0.640668	6.70409	0.018083	0.193191	-99.5865
ENSMUSG00000086782	E130102H24Rik	77866	RIKEN cDNA E130102H24 gene	5.69046	-0.353104	6.69885	0.018122	0.193215	51.6416
ENSMUSG00000029286	Enam	13801	enamelin	-7.73545	-0.426211	6.69825	0.0181264	0.193215	-213.109
ENSMUSG00000027519	Rab22a	19334	RAB22A, member RAS oncogene family	0.759663	6.43803	6.52582	0.0181376	0.193215	1.69309
ENSMUSG00000091736	Yy2	100073351	Yy2 transcription factor	2.14418	3.00049	6.57603	0.0181425	0.193215	4.42041
ENSMUSG00000030347	D6Wsu163e	28040	DNA segment, Chr 6, Wayne State University 163, expressed	1.1852	5.42524	6.52246	0.0181638	0.193289	2.27395
ENSMUSG00000048218	Amigo2	105827	adhesion molecule with Ig like domain 2	-6.87864	-0.852568	6.68468	0.0182278	0.193783	-117.673
ENSMUSG00000010803	Gabra1	14394	gamma-aminobutyric acid (GABA) A receptor, subunit alpha 1	-8.09315	-0.312651	6.61997	0.0182389	0.193783	-273.075
ENSMUSG00000019923	Zwint	52696	ZW10 interactor	0.969032	5.22209	6.50917	0.0182679	0.193792	1.95753
ENSMUSG00000028458	Tesk1	21754	testis specific protein kinase 1	-1.60512	4.95049	6.50911	0.0182684	0.193792	-3.04221
ENSMUSG00000086212	Mkln1os	100503869	muskelin 1, intracellular mediator containing kelch motifs, opposite strand	-6.75728	-0.388744	6.67678	0.018287	0.193826	-108.179
ENSMUSG00000047030	Spata2	263876	spermatogenesis associated 2	1.20948	5.25421	6.50448	0.0183048	0.193826	2.31254
ENSMUSG00000026424	Gpr37l1	171469	G protein-coupled receptor 37-like 1	3.24101	2.45654	6.50322	0.0183147	0.193826	9.45455
ENSMUSG00000021256	Vash1	238328	vasohibin 1	-3.58108	2.30873	6.49941	0.0183449	0.193828	-11.9677
ENSMUSG00000039209	Rpl39l	68172	ribosomal protein L39-like	6.81124	-0.100491	6.54922	0.0183501	0.193828	112.302
ENSMUSG00000039661	Dusp26	66959	dual specificity phosphatase 26 (putative)	6.6818	-0.265037	6.66736	0.018358	0.193828	102.665
ENSMUSG00000039637	Coro7	78885	coronin 7	-0.717263	6.1876	6.4935	0.0183916	0.19393	-1.64406
ENSMUSG00000020437	Myo1g	246177	myosin IG	0.719615	6.70059	6.49289	0.0183964	0.19393	1.64674
ENSMUSG00000040463	Mybbp1a	18432	MYB binding protein (P160) 1a	-1.01915	5.55678	6.48994	0.0184198	0.194026	-2.02672
ENSMUSG00000024807	Syvn1	74126	synovial apoptosis inhibitor 1, synoviolin	0.91282	5.99827	6.48519	0.0184576	0.194272	1.88272
ENSMUSG00000075012	Fjx1	14221	four jointed box 1	6.74038	0.27713	6.6473	0.0185102	0.194555	106.919
ENSMUSG00000037210	Fam193a	231128	family with sequence similarity 193, member A	-0.564399	7.56195	6.4782	0.0185132	0.194555	-1.47877
ENSMUSG00000059355	Wdr83os	414077	WD repeat domain 83 opposite strand	-0.938415	5.36125	6.47445	0.0185432	0.194616	-1.91642
ENSMUSG00000060802	B2m	12010	beta-2 microglobulin	0.264409	11.9085	6.47353	0.0185505	0.194616	1.20114
ENSMUSG00000016327	Atp1b4	67821	ATPase, (Na+)/K+ transporting, beta 4 polypeptide	-5.94815	2.60116	6.47205	0.0185624	0.194616	-61.7406
ENSMUSG00000047013	Fbxo41	330369	F-box protein 41	7.20508	-1.1878	6.98678	0.0185806	0.194657	147.552
ENSMUSG00000038965	Ube2l3	22195	ubiquitin-conjugating enzyme E2L 3	0.660628	7.20562	6.46698	0.018603	0.19474	1.58077
ENSMUSG00000039452	Snx22	382083	sorting nexin 22	-4.4712	0.976343	6.46105	0.0186506	0.195088	-22.1802
ENSMUSG00000028519	Dab1	13131	disabled 1	6.06409	-0.367056	6.62421	0.0186871	0.195316	66.9072
ENSMUSG00000037703	Lzts3	241638	leucine zipper, putative tumor suppressor family member 3	3.91904	1.68505	6.45475	0.0187014	0.195316	15.1269
ENSMUSG00000056158	Car10	72605	carbonic anhydrase 10	7.30798	-0.475585	6.68956	0.0187238	0.195399	158.461
ENSMUSG00000049489	Ccnq	69109	cyclin Q	1.6722	4.32832	6.45	0.0187398	0.195414	3.18701
ENSMUSG00000054589	Gm9949	225609	predicted gene 9949	-3.61831	0.589555	6.44762	0.018759	0.195465	-12.2806
ENSMUSG00000029591	Ung	22256	uracil DNA glycosylase	5.42851	-0.316534	6.4939	0.0187869	0.195604	43.0669
ENSMUSG00000029103	Lrpap1	16976	low density lipoprotein receptor-related protein associated protein 1	0.759397	5.89148	6.43039	0.0188992	0.196621	1.69278
ENSMUSG00000037315	Jade3	382207	jade family PHD finger 3	-2.90427	4.13384	6.42596	0.0189353	0.196695	-7.48638
ENSMUSG00000041889	Shisa4	77552	shisa family member 4	4.95506	0.368539	6.42459	0.0189465	0.196695	31.0185
ENSMUSG00000030120	Mlf2	30853	myeloid leukemia factor 2	-1.05693	4.58701	6.42303	0.0189593	0.196695	-2.0805
ENSMUSG00000020253	Ppm1m	67905	protein phosphatase 1M	-1.73137	4.61299	6.42058	0.0189794	0.196695	-3.32043
ENSMUSG00000005656	Snx6	72183	sorting nexin 6	0.650058	6.88406	6.41933	0.0189897	0.196695	1.56923
ENSMUSG00000032216	Nedd4	17999	neural precursor cell expressed, developmentally down-regulated 4	1.6045	4.2107	6.41718	0.0190073	0.196695	3.0409
ENSMUSG00000030007	Cct7	12468	chaperonin containing Tcp1, subunit 7 (eta)	0.801381	5.90174	6.41707	0.0190083	0.196695	1.74277
ENSMUSG00000044576	Garem2	242915	GRB2 associated regulator of MAPK1 subtype 2	-7.85612	-0.00517245	6.57965	0.0190339	0.19681	-231.7
ENSMUSG00000007097	Atp1a2	98660	ATPase, Na+/K+ transporting, alpha 2 polypeptide	-1.79874	5.64638	6.40972	0.0190688	0.19702	-3.47917
ENSMUSG00000086401	Gm15559	100504049	predicted gene 15559	5.63209	0.191098	6.56279	0.019167	0.197809	49.5939
ENSMUSG00000001300	Efnb2	13642	ephrin B2	2.99205	3.31394	6.39574	0.0191845	0.197809	7.95602
ENSMUSG00000034037	Fgd5	232237	FYVE, RhoGEF and PH domain containing 5	-7.91183	0.244526	6.55932	0.0191946	0.197809	-240.823
ENSMUSG00000020335	Zfp354b	27274	zinc finger protein 354B	-3.33859	2.114	6.39341	0.0192038	0.197809	-10.1162
ENSMUSG00000051339	2900026A02Rik	243219	RIKEN cDNA 2900026A02 gene	2.23244	4.78699	6.39143	0.0192203	0.197828	4.69928
ENSMUSG00000015355	Cd48	12506	CD48 antigen	0.71261	6.45053	6.38843	0.0192453	0.197935	1.63877
ENSMUSG00000062170	Fmr1nb	207854	Fmr1 neighbor	-8.16415	0.782901	6.54831	0.0192822	0.198163	-286.85
ENSMUSG00000041147	Brca2	12190	breast cancer 2, early onset	-2.04344	3.60917	6.38056	0.0193109	0.198278	-4.12226
ENSMUSG00000052428	Tmco1	68944	transmembrane and coiled-coil domains 1	-0.962837	6.10139	6.37915	0.0193227	0.198278	-1.94914
ENSMUSG00000014470	Rnf166	68718	ring finger protein 166	0.734873	6.26097	6.37665	0.0193437	0.198341	1.66425
ENSMUSG00000026072	Il1r1	16177	interleukin 1 receptor, type I	2.2467	2.80988	6.37209	0.0193819	0.198341	4.74595
ENSMUSG00000057778	Cyb5d2	192986	cytochrome b5 domain containing 2	1.08647	4.57377	6.37082	0.0193926	0.198341	2.12354
ENSMUSG00000014039	Prdm15	114604	PR domain containing 15	1.43013	4.66785	6.37016	0.0193982	0.198341	2.69471
ENSMUSG00000050503	Fbxl22	74165	F-box and leucine-rich repeat protein 22	-3.31972	0.794827	6.36756	0.01942	0.198341	-9.98467
ENSMUSG00000097456	LOC100862268	100862268	uncharacterized LOC100862268	-6.03682	3.07972	6.36625	0.019431	0.198341	-65.6546
ENSMUSG00000063904	Dpp3	75221	dipeptidylpeptidase 3	1.33428	4.80181	6.36587	0.0194342	0.198341	2.52149
ENSMUSG00000071172	Srsf3	20383	serine/arginine-rich splicing factor 3	0.385095	9.15225	6.36443	0.0194463	0.198341	1.30595
ENSMUSG00000040667	Nup88	19069	nucleoporin 88	0.578615	7.15915	6.35926	0.01949	0.19847	1.49342
ENSMUSG00000039382	Wdr45	54636	WD repeat domain 45	1.55661	4.1049	6.35915	0.0194909	0.19847	2.94161
ENSMUSG00000042641	Rgsl1	240816	regulator of G-protein signaling like 1	5.94805	-0.658327	6.75557	0.0195031	0.19847	61.7363
ENSMUSG00000027173	Depdc7	211896	DEP domain containing 7	-1.4992	3.87952	6.35434	0.0195316	0.198565	-2.82687
ENSMUSG00000028364	Tnc	21923	tenascin C	8.22925	-0.267309	6.5842	0.0195418	0.198565	300.089
ENSMUSG00000048376	F2r	14062	coagulation factor II (thrombin) receptor	-7.99446	0.341091	6.45193	0.0195718	0.19872	-255.019
ENSMUSG00000006471	Ndor1	78797	NADPH dependent diflavin oxidoreductase 1	-1.41696	5.63313	6.33672	0.0196815	0.199473	-2.67021
ENSMUSG00000032437	Stt3b	68292	STT3, subunit of the oligosaccharyltransferase complex, homolog B (S. cerevisiae)	0.722446	6.49426	6.33633	0.0196848	0.199473	1.64998
ENSMUSG00000013662	Atad1	67979	ATPase family, AAA domain containing 1	0.572956	7.58446	6.33551	0.0196918	0.199473	1.48757
ENSMUSG00000021400	Wrnip1	78903	Werner helicase interacting protein 1	-2.63188	3.1891	6.33166	0.0197248	0.199473	-6.19835
ENSMUSG00000031314	Taf1	270627	TATA-box binding protein associated factor 1	0.831387	6.53428	6.32917	0.0197461	0.199473	1.77939
ENSMUSG00000021963	Sap18	20220	Sin3-associated polypeptide 18	-1.34685	5.81157	6.32788	0.0197572	0.199473	-2.54356
ENSMUSG00000039745	Htatip2	53415	HIV-1 Tat interactive protein 2	-4.16446	1.57504	6.32562	0.0197766	0.199473	-17.932
ENSMUSG00000038587	Akap12	83397	A kinase (PRKA) anchor protein (gravin) 12	2.5083	2.97119	6.32542	0.0197783	0.199473	5.68947
ENSMUSG00000051736	Fam229b	66337	family with sequence similarity 229, member B	4.2194	-0.222586	6.32535	0.0197789	0.199473	18.628
ENSMUSG00000026589	Sec16b	89867	SEC16 homolog B (S. cerevisiae)	-3.73526	2.31442	6.323	0.0197991	0.19949	-13.3176
ENSMUSG00000021600	8030423J24Rik	77166	RIKEN cDNA 8030423J24 gene	-4.88543	-0.57524	6.42325	0.0198101	0.19949	-29.557
ENSMUSG00000034007	Scaper	244891	S phase cyclin A-associated protein in the ER	-0.876915	6.49233	6.31897	0.0198338	0.199579	-1.83644
ENSMUSG00000031629	Cenpu	71876	centromere protein U	-3.74615	1.91227	6.31697	0.019851	0.199604	-13.4185
ENSMUSG00000033909	Usp36	72344	ubiquitin specific peptidase 36	0.87185	5.89342	6.31406	0.0198761	0.199639	1.83001
ENSMUSG00000028015	Ctso	229445	cathepsin O	-0.611283	6.92728	6.31269	0.019888	0.199639	-1.52762
ENSMUSG00000000901	Mmp11	17385	matrix metallopeptidase 11	4.21922	1.34553	6.31002	0.0199111	0.199639	18.6256
ENSMUSG00000047098	Rnf31	268749	ring finger protein 31	-0.741063	6.44114	6.30973	0.0199136	0.199639	-1.67141
ENSMUSG00000002416	Ndufb2	68198	NADH:ubiquinone oxidoreductase subunit B2	2.44711	2.76749	6.30455	0.0199585	0.19994	5.45323
ENSMUSG00000089929	Bcl2a1b	12045	B cell leukemia/lymphoma 2 related protein A1b	0.608639	6.83608	6.30053	0.0199934	0.200033	1.52482
ENSMUSG00000055660	Mettl4	76781	methyltransferase like 4	-2.65336	4.30021	6.30007	0.0199974	0.200033	-6.2913
ENSMUSG00000024176	Sox8	20681	SRY (sex determining region Y)-box 8	-6.17655	0.237621	6.39801	0.0200225	0.200136	-72.3313
ENSMUSG00000039577	Nphp4	260305	nephronophthisis 4 (juvenile) homolog (human)	-6.68825	-0.714101	6.39373	0.0200587	0.20035	-103.125
ENSMUSG00000031902	Nfatc3	18021	nuclear factor of activated T cells, cytoplasmic, calcineurin dependent 3	-0.684211	7.16289	6.2869	0.0201123	0.200476	-1.60682
ENSMUSG00000035275	Raver2	242570	ribonucleoprotein, PTB-binding 2	-3.10176	1.94258	6.28618	0.0201186	0.200476	-8.58463
ENSMUSG00000070047	Fat1	14107	FAT atypical cadherin 1	2.17113	3.30359	6.28588	0.0201212	0.200476	4.50377
ENSMUSG00000063884	Ptcd3	69956	pentatricopeptide repeat domain 3	1.10517	5.29644	6.28145	0.02016	0.200476	2.15124
ENSMUSG00000030218	Mgp	17313	matrix Gla protein	-5.99301	-0.687306	6.43996	0.0201692	0.200476	-63.6906
ENSMUSG00000022967	Ifnar1	15975	interferon (alpha and beta) receptor 1	-0.645589	7.44743	6.27947	0.0201775	0.200476	-1.56438
ENSMUSG00000042763	Maneal	215090	mannosidase, endo-alpha-like	4.81782	-0.824308	6.43779	0.0201874	0.200476	28.2038
ENSMUSG00000030247	Kcnj8	16523	potassium inwardly-rectifying channel, subfamily J, member 8	-7.95817	0.796991	6.3783	0.0201902	0.200476	-248.684
ENSMUSG00000037426	Depdc5	277854	DEP domain containing 5	1.01012	5.99972	6.2731	0.0202335	0.200759	2.01408
ENSMUSG00000043644	0610009L18Rik	66838	RIKEN cDNA 0610009L18 gene	-5.77788	-0.517305	6.42675	0.0202804	0.20091	-54.8673
ENSMUSG00000041765	Ubac2	68889	ubiquitin associated domain containing 2	1.63436	4.3135	6.26743	0.0202835	0.20091	3.10451
ENSMUSG00000026826	Nr4a2	18227	nuclear receptor subfamily 4, group A, member 2	3.56921	2.75535	6.26632	0.0202933	0.20091	11.8697
ENSMUSG00000011257	Pabpc4	230721	poly(A) binding protein, cytoplasmic 4	1.40265	4.80359	6.26212	0.0203305	0.201091	2.64387
ENSMUSG00000024681	Ms4a3	170813	membrane-spanning 4-domains, subfamily A, member 3	-8.18196	-0.188162	6.41955	0.0203414	0.201091	-290.413
ENSMUSG00000019718	L3hypdh	67217	L-3-hydroxyproline dehydratase (trans-)	-4.34985	1.46027	6.25827	0.0203646	0.201149	-20.3908
ENSMUSG00000025421	Hdhd2	76987	haloacid dehalogenase-like hydrolase domain containing 2	1.89783	3.99957	6.25687	0.020377	0.201149	3.72653
ENSMUSG00000019809	Pex3	56535	peroxisomal biogenesis factor 3	-1.33488	4.93459	6.25327	0.020409	0.201294	-2.52254
ENSMUSG00000024774	Ankrd22	52024	ankyrin repeat domain 22	-6.93378	-1.00284	6.4097	0.0204251	0.201294	-122.258
ENSMUSG00000035062	Zc4h2	245522	zinc finger, C4H2 domain containing	-3.26998	2.77311	6.25	0.0204381	0.201294	-9.64632
ENSMUSG00000048905	4930539E08Rik	207819	RIKEN cDNA 4930539E08 gene	3.0586	1.71784	6.24852	0.0204513	0.201294	8.33165
ENSMUSG00000028885	Smpdl3b	100340	sphingomyelin phosphodiesterase, acid-like 3B	2.14196	3.36343	6.24618	0.0204722	0.201353	4.41361
ENSMUSG00000021428	Riok1	71340	RIO kinase 1	1.62301	4.73894	6.24342	0.0204969	0.201448	3.08016
ENSMUSG00000036099	Vezt	215008	vezatin, adherens junctions transmembrane protein	-0.773394	6.1981	6.23942	0.0205327	0.201653	-1.70929
ENSMUSG00000095195	Gm3005	100040870	predicted gene 3005	-2.76545	4.07214	6.23576	0.0205655	0.201828	-6.79962
ENSMUSG00000024925	Rnaseh2c	68209	ribonuclease H2, subunit C	1.56349	4.19712	6.2341	0.0205804	0.201828	2.95568
ENSMUSG00000018196	Glrx2	69367	glutaredoxin 2 (thioltransferase)	1.26951	5.28549	6.22877	0.0206283	0.202151	2.41079
ENSMUSG00000023036	Pcdhgc4	93707	protocadherin gamma subfamily C, 4	-0.726629	6.22608	6.22447	0.0206671	0.202384	-1.65477
ENSMUSG00000003234	Abcf3	27406	ATP-binding cassette, sub-family F (GCN20), member 3	-0.875484	5.75069	6.21646	0.0207394	0.202946	-1.83462
ENSMUSG00000004562	Arhgef40	268739	Rho guanine nucleotide exchange factor (GEF) 40	-0.541588	6.36861	6.21379	0.0207636	0.203035	-1.45557
ENSMUSG00000050272	Dscam	13508	DS cell adhesion molecule	6.5282	-0.938731	6.36664	0.0207955	0.2032	92.296
ENSMUSG00000037070	Rbmxl1	19656	RNA binding motif protein, X-linked like-1	0.992953	5.32168	6.2058	0.0208363	0.203451	1.99026
ENSMUSG00000034158	Lrrc58	320184	leucine rich repeat containing 58	0.68693	8.42305	6.19573	0.0209282	0.204145	1.60985
ENSMUSG00000039367	Sec24c	218811	Sec24 related gene family, member C (S. cerevisiae)	-0.566788	6.75411	6.19257	0.0209571	0.204145	-1.48122
ENSMUSG00000041120	Nbl1	17965	neuroblastoma, suppression of tumorigenicity 1	-4.96127	0.734213	6.34696	0.0209674	0.204145	-31.1524
ENSMUSG00000037638	Zbtb42	382639	zinc finger and BTB domain containing 42	-7.30889	-0.259042	6.28921	0.0209678	0.204145	-158.56
ENSMUSG00000021268	Meg3	17263	maternally expressed 3	4.83833	2.87197	6.18541	0.0210228	0.204405	28.6077
ENSMUSG00000051768	Xrcc1	22594	X-ray repair complementing defective repair in Chinese hamster cells 1	-2.19179	3.8651	6.18395	0.0210362	0.204405	-4.56871
ENSMUSG00000033624	Pdpr	319518	pyruvate dehydrogenase phosphatase regulatory subunit	-1.24308	4.69275	6.18355	0.0210399	0.204405	-2.36703
ENSMUSG00000031861	Lpar2	53978	lysophosphatidic acid receptor 2	-4.16155	2.0061	6.1796	0.0210763	0.204612	-17.8958
ENSMUSG00000006932	Ctnnb1	12387	catenin (cadherin associated protein), beta 1	0.695321	8.34642	6.17297	0.0211376	0.204975	1.61925
ENSMUSG00000021037	Ahsa1	217737	AHA1, activator of heat shock protein ATPase 1	-1.14825	5.41198	6.17226	0.0211441	0.204975	-2.21645
ENSMUSG00000056073	Grik2	14806	glutamate receptor, ionotropic, kainate 2 (beta 2)	6.34437	-1.05959	6.54391	0.021189	0.205104	81.2543
ENSMUSG00000035164	Zc3h12c	244871	zinc finger CCCH type containing 12C	1.14133	6.00164	6.16479	0.0212133	0.205104	2.20585
ENSMUSG00000051517	Arhgef39	230098	Rho guanine nucleotide exchange factor (GEF) 39	-4.32503	1.12338	6.16443	0.0212167	0.205104	-20.0431
ENSMUSG00000032899	Styk1	243659	serine/threonine/tyrosine kinase 1	-2.84175	1.36435	6.16338	0.0212264	0.205104	-7.16888
ENSMUSG00000020564	Atxn7l1	380753	ataxin 7-like 1	-0.788343	6.45282	6.16263	0.0212334	0.205104	-1.72709
ENSMUSG00000034932	Mrpl54	66047	mitochondrial ribosomal protein L54	2.94038	1.10647	6.15516	0.021303	0.205374	7.67615
ENSMUSG00000087026	A230103J11Rik	320466	RIKEN cDNA A230103J11 gene	4.48716	-0.114835	6.20014	0.0213106	0.205374	22.427
ENSMUSG00000031148	Gpkow	209416	G patch domain and KOW motifs	-0.868784	6.05898	6.15331	0.0213203	0.205374	-1.82612
ENSMUSG00000085081	Rptoros	319454	regulatory associated protein of MTOR, complex 1, opposite strand	-3.12285	2.05365	6.15311	0.0213222	0.205374	-8.71106
ENSMUSG00000071350	Setdb2	239122	SET domain, bifurcated 2	-1.86207	4.45997	6.14933	0.0213575	0.205567	-3.63529
ENSMUSG00000024067	Dpy30	66310	dpy-30, histone methyltransferase complex regulatory subunit	-2.59039	4.1022	6.1411	0.0214347	0.206164	-6.02261
ENSMUSG00000052087	Rgs14	51791	regulator of G-protein signaling 14	-2.50369	2.39167	6.13919	0.0214526	0.206181	-5.67135
ENSMUSG00000045165	AI467606	101602	expressed sequence AI467606	1.43784	3.85657	6.13766	0.0214671	0.206181	2.70915
ENSMUSG00000049680	Urgcp	72046	upregulator of cell proliferation	-1.45259	4.36943	6.13571	0.0214853	0.20621	-2.73699
ENSMUSG00000030753	Thap12	72981	THAP domain containing 12	-1.49115	5.29639	6.13199	0.0215205	0.206401	-2.81113
ENSMUSG00000039086	Ss18l1	269397	SS18, nBAF chromatin remodeling complex subunit like 1	1.4799	5.62533	6.12816	0.0215566	0.206552	2.78928
ENSMUSG00000022197	Pdzd2	68070	PDZ domain containing 2	-3.51149	1.58388	6.12444	0.0215919	0.206552	-11.4042
ENSMUSG00000078942	Naip6	17952	NLR family, apoptosis inhibitory protein 6	0.69679	7.39956	6.12378	0.0215981	0.206552	1.62089
ENSMUSG00000009248	Ascl2	17173	achaete-scute family bHLH transcription factor 2	3.34336	1.6694	6.12301	0.0216054	0.206552	10.1497
ENSMUSG00000048486	Fitm2	228859	fat storage-inducing transmembrane protein 2	3.3227	3.04345	6.12184	0.0216165	0.206552	10.0053
ENSMUSG00000014837	4931428F04Rik	74356	RIKEN cDNA 4931428F04 gene	-6.63398	0.148079	6.27296	0.021628	0.206552	-99.3177
ENSMUSG00000017830	Dhx58	80861	DEXH (Asp-Glu-X-His) box polypeptide 58	1.25202	4.03625	6.11797	0.0216533	0.206647	2.38174
ENSMUSG00000051934	Spats2	72572	spermatogenesis associated, serine-rich 2	2.52491	2.80523	6.11055	0.0217239	0.20706	5.75536
ENSMUSG00000034135	Sik3	70661	SIK family kinase 3	-0.743244	5.72245	6.10671	0.0217605	0.20706	-1.67394
ENSMUSG00000001052	Sec24b	99683	Sec24 related gene family, member B (S. cerevisiae)	0.725772	7.1789	6.10514	0.0217755	0.20706	1.65379
ENSMUSG00000005800	Mmp8	17394	matrix metallopeptidase 8	-1.51997	6.41371	6.10496	0.0217773	0.20706	-2.86785
ENSMUSG00000067424	Zfp563	240068	zinc finger protein 563	2.64536	2.82296	6.1037	0.0217893	0.20706	6.2565
ENSMUSG00000054702	Ap1s3	252903	adaptor-related protein complex AP-1, sigma 3	-1.77751	2.71197	6.10225	0.0218032	0.20706	-3.42833
ENSMUSG00000036676	Tmtc3	237500	transmembrane and tetratricopeptide repeat containing 3	0.677311	6.27716	6.10218	0.0218038	0.20706	1.59916
ENSMUSG00000044550	Tceal3	594844	transcription elongation factor A (SII)-like 3	7.11533	-0.958178	6.30713	0.0218935	0.207514	138.652
ENSMUSG00000002661	Alkbh7	66400	alkB homolog 7	3.28986	1.77563	6.13779	0.0218938	0.207514	9.78015
ENSMUSG00000048756	Foxo3	56484	forkhead box O3	-0.452148	7.4765	6.08739	0.0219461	0.207514	-1.36808
ENSMUSG00000047193	Dync2h1	110350	dynein cytoplasmic 2 heavy chain 1	-2.30221	4.363	6.08525	0.0219667	0.207514	-4.93213
ENSMUSG00000031995	St14	19143	suppression of tumorigenicity 14 (colon carcinoma)	2.47648	3.64407	6.08365	0.0219822	0.207514	5.56538
ENSMUSG00000037386	Rims2	116838	regulating synaptic membrane exocytosis 2	-7.80572	-0.373615	6.23357	0.0219892	0.207514	-223.746
ENSMUSG00000047242	Taf9b	407786	TATA-box binding protein associated factor 9B	-2.50735	3.49752	6.08174	0.0220006	0.207514	-5.68575
ENSMUSG00000031444	F10	14058	coagulation factor X	2.82471	0.728603	6.07867	0.0220303	0.207514	7.08472
ENSMUSG00000038564	Ift172	67661	intraflagellar transport 172	1.13966	5.45392	6.07856	0.0220314	0.207514	2.20328
ENSMUSG00000028182	Lrriq3	74435	leucine-rich repeats and IQ motif containing 3	-4.889	1.23221	6.07619	0.0220544	0.207514	-29.6302
ENSMUSG00000090230	LOC108167825	108167825	uncharacterized LOC108167825	-5.08564	-0.403814	6.07544	0.0220617	0.207514	-33.9571
ENSMUSG00000040631	Dok4	114255	docking protein 4	-5.49688	-0.802571	6.16724	0.0220877	0.207514	-45.1571
ENSMUSG00000028958	Tmub1	64295	transmembrane and ubiquitin-like domain containing 1	4.13928	0.814745	6.07079	0.0221068	0.207514	17.6217
ENSMUSG00000022756	Slc7a4	224022	solute carrier family 7 (cationic amino acid transporter, y+ system), member 4	4.78707	0.992805	6.069	0.0221243	0.207514	27.609
ENSMUSG00000026610	Esrrg	26381	estrogen-related receptor gamma	-4.85983	0.729336	6.11158	0.0221443	0.207514	-29.0373
ENSMUSG00000071561	BC100530	100034684	cDNA sequence BC100530	-5.45065	0.128796	6.42846	0.0221789	0.207514	-43.733
ENSMUSG00000037824	Tspan14	52588	tetraspanin 14	-0.520945	7.03462	6.0631	0.0221818	0.207514	-1.43489
ENSMUSG00000027160	Ccdc34	68201	coiled-coil domain containing 34	1.10345	4.74771	6.06246	0.022188	0.207514	2.14868
ENSMUSG00000078656	Vps25	28084	vacuolar protein sorting 25	1.32352	5.26852	6.06218	0.0221907	0.207514	2.50276
ENSMUSG00000044645	Gm7334	654432	B-cell translocation gene 3 pseudogene	-7.87411	0.284493	6.21125	0.022197	0.207514	-234.609
ENSMUSG00000032010	Usp2	53376	ubiquitin specific peptidase 2	0.759167	7.15309	6.05955	0.0222164	0.207514	1.69251
ENSMUSG00000034664	Itga2b	16399	integrin alpha 2b	6.45726	-1.10202	6.26971	0.0222351	0.207514	87.8673
ENSMUSG00000005237	Dnah2	327954	dynein, axonemal, heavy chain 2	2.99239	2.32557	6.05661	0.0222452	0.207514	7.95793
ENSMUSG00000020646	Mboat2	67216	membrane bound O-acyltransferase domain containing 2	-6.99837	0.868781	6.20489	0.0222566	0.207514	-127.856
ENSMUSG00000047108	Dnajb7	57755	DnaJ heat shock protein family (Hsp40) member B7	-4.80183	0.651245	6.20087	0.0222943	0.207514	-27.8929
ENSMUSG00000037280	Galnt6	207839	polypeptide N-acetylgalactosaminyltransferase 6	-2.69635	3.27073	6.04943	0.0223157	0.207514	-6.48161
ENSMUSG00000019796	Lrp11	237253	low density lipoprotein receptor-related protein 11	5.06135	-0.419382	6.25954	0.0223289	0.207514	33.3902
ENSMUSG00000040133	Gpr176	381413	G protein-coupled receptor 176	-8.62156	0.265997	6.32954	0.0223363	0.207514	-393.865
ENSMUSG00000031575	Ash2l	23808	ASH2 like histone lysine methyltransferase complex subunit	-1.09122	5.44868	6.04633	0.0223461	0.207514	-2.13054
ENSMUSG00000028517	Plpp3	67916	phospholipid phosphatase 3	2.393	3.61452	6.04552	0.0223542	0.207514	5.25248
ENSMUSG00000042729	Wdr74	107071	WD repeat domain 74	-1.81556	3.75373	6.04248	0.0223841	0.207514	-3.51996
ENSMUSG00000031782	Coq9	67914	coenzyme Q9	2.27959	3.36106	6.0411	0.0223977	0.207514	4.85541
ENSMUSG00000031310	Zmym3	56364	zinc finger, MYM-type 3	-0.768735	6.14067	6.03994	0.0224092	0.207514	-1.70378
ENSMUSG00000086564	Cd101	630146	CD101 antigen	-2.07531	3.48383	6.03962	0.0224124	0.207514	-4.21434
ENSMUSG00000047434	Xxylt1	268880	xyloside xylosyltransferase 1	-1.95879	3.34049	6.03884	0.0224201	0.207514	-3.88736
ENSMUSG00000062944	9130023H24Rik	100043133	RIKEN cDNA 9130023H24 gene	-2.6388	4.20061	6.03873	0.0224211	0.207514	-6.22812
ENSMUSG00000030805	Stx4a	20909	syntaxin 4A (placental)	0.616969	7.12112	6.03873	0.0224211	0.207514	1.53365
ENSMUSG00000085596	Gm11476	102634096	predicted gene 11476	6.4335	-0.945723	6.73061	0.0224484	0.207514	86.4325
ENSMUSG00000051212	Gpr183	321019	G protein-coupled receptor 183	-0.621257	7.30132	6.03571	0.022451	0.207514	-1.53821
ENSMUSG00000024966	Stip1	20867	stress-induced phosphoprotein 1	0.953265	5.47446	6.0323	0.0224848	0.207548	1.93625
ENSMUSG00000028383	Hsdl2	72479	hydroxysteroid dehydrogenase like 2	1.79321	4.46549	6.03224	0.0224854	0.207548	3.46586
ENSMUSG00000071796	6820431F20Rik	547150	cadherin 11 pseudogene	0.40848	7.77002	6.02911	0.0225164	0.207693	1.32729
ENSMUSG00000029048	Rer1	67830	retention in endoplasmic reticulum sorting receptor 1	0.562695	6.66203	6.02187	0.0225884	0.208084	1.47703
ENSMUSG00000024542	Cep192	70799	centrosomal protein 192	0.566979	6.76089	6.02174	0.0225897	0.208084	1.48142
ENSMUSG00000037977	6430571L13Rik	235599	RIKEN cDNA 6430571L13 gene	-7.51262	-0.544583	6.22202	0.0226792	0.208733	-182.61
ENSMUSG00000097577	6230400D17Rik	76133	RIKEN cDNA 6230400D17 gene	-3.09506	3.54821	6.00948	0.0227122	0.208733	-8.54485
ENSMUSG00000030409	Dmpk	13400	dystrophia myotonica-protein kinase	-6.98791	-0.534383	6.10212	0.022713	0.208733	-126.932
ENSMUSG00000034648	Lrrn1	16979	leucine rich repeat protein 1, neuronal	4.57156	1.63192	6.00851	0.022722	0.208733	23.7781
ENSMUSG00000021263	Degs2	70059	delta(4)-desaturase, sphingolipid 2	-1.36736	4.65993	6.00294	0.0227779	0.209081	-2.57998
ENSMUSG00000020657	Dnajc27	217378	DnaJ heat shock protein family (Hsp40) member C27	2.19016	3.08328	6.00165	0.0227909	0.209081	4.56355
ENSMUSG00000018604	Tbx3	21386	T-box 3	-6.37088	-0.632175	6.14123	0.0228631	0.209578	-82.7608
ENSMUSG00000026220	Slc16a14	71781	solute carrier family 16 (monocarboxylic acid transporters), member 14	-7.08293	-0.847841	6.13853	0.0228892	0.209578	-135.573
ENSMUSG00000031903	Pla2g15	192654	phospholipase A2, group XV	0.517787	7.36044	5.99167	0.0228915	0.209578	1.43176
ENSMUSG00000024901	Peli3	240518	pellino 3	-4.98403	0.161691	6.08166	0.0229136	0.209625	-31.6477
ENSMUSG00000039738	Slx4	52864	SLX4 structure-specific endonuclease subunit homolog (S. cerevisiae)	-1.30469	4.92084	5.9881	0.0229277	0.209625	-2.47031
ENSMUSG00000030494	Rhpn2	52428	rhophilin, Rho GTPase binding protein 2	-7.28512	-0.0234355	6.07816	0.0229482	0.20967	-155.97
ENSMUSG00000031381	Piga	18700	phosphatidylinositol glycan anchor biosynthesis, class A	-2.47107	3.60275	5.97917	0.0230184	0.210095	-5.54456
ENSMUSG00000019916	P4ha1	18451	procollagen-proline, 2-oxoglutarate 4-dioxygenase (proline 4-hydroxylase), alpha 1 polypeptide	0.641709	7.59979	5.97843	0.0230258	0.210095	1.56018
ENSMUSG00000025008	Tctn3	67590	tectonic family member 3	2.54358	3.36925	5.97544	0.0230564	0.210111	5.83033
ENSMUSG00000033278	Ptprm	19274	protein tyrosine phosphatase, receptor type, M	-1.11472	6.13675	5.97489	0.023062	0.210111	-2.16553
ENSMUSG00000097284	4930480K23Rik	75016	RIKEN cDNA 4930480K23 gene	-3.2451	0.986817	5.97329	0.0230783	0.210111	-9.48138
ENSMUSG00000002006	Pdzd4	245469	PDZ domain containing 4	-2.91357	2.09515	5.97089	0.0231027	0.210111	-7.5348
ENSMUSG00000078931	Pdf	68023	peptide deformylase (mitochondrial)	-3.72721	1.93294	5.9706	0.0231058	0.210111	-13.2435
ENSMUSG00000051413	Plagl2	54711	pleiomorphic adenoma gene-like 2	-0.586724	7.22607	5.96911	0.0231209	0.210111	-1.50183
ENSMUSG00000047115	Fam221a	231946	family with sequence similarity 221, member A	-6.96448	-0.486874	6.11035	0.023164	0.210361	-124.887
ENSMUSG00000007646	Rad51c	114714	RAD51 paralog C	2.07714	2.80055	5.96339	0.0231796	0.210361	4.21971
ENSMUSG00000037217	Syn1	20964	synapsin I	4.69185	0.781868	5.95966	0.0232178	0.210566	25.8456
ENSMUSG00000026180	Cxcr2	12765	chemokine (C-X-C motif) receptor 2	-0.743982	7.70665	5.95445	0.0232714	0.210612	-1.67479
ENSMUSG00000010054	Tusc2	80385	tumor suppressor 2, mitochondrial calcium regulator	2.091	2.68298	5.95305	0.0232858	0.210612	4.26045
ENSMUSG00000041429	Nthl1	18207	nth (endonuclease III)-like 1 (E.coli)	-6.02035	0.0929999	6.09493	0.023316	0.210612	-64.9093
ENSMUSG00000024829	Mrpl21	353242	mitochondrial ribosomal protein L21	2.53211	4.41477	5.94969	0.0233205	0.210612	5.78416
ENSMUSG00000033022	Cdo1	12583	cysteine dioxygenase 1, cytosolic	-7.16008	0.309991	6.04017	0.0233266	0.210612	-143.021
ENSMUSG00000022103	Gfra2	14586	glial cell line derived neurotrophic factor family receptor alpha 2	-5.10616	1.42503	6.09195	0.0233455	0.210612	-34.4435
ENSMUSG00000029482	Aacs	78894	acetoacetyl-CoA synthetase	-2.43575	1.96544	5.98938	0.0233554	0.210612	-5.41044
ENSMUSG00000046449	Nexmif	245555	neurite extension and migration factor	6.04793	0.196711	6.09086	0.0233562	0.210612	66.1621
ENSMUSG00000043833	2900005J15Rik	67261	RIKEN cDNA 2900005J15 gene	-2.849	2.82986	5.94489	0.0233702	0.210612	-7.20498
ENSMUSG00000059921	Unc5c	22253	unc-5 netrin receptor C	5.20865	0.484444	6.08859	0.0233788	0.210612	36.9795
ENSMUSG00000057963	Itpk1	217837	inositol 1,3,4-triphosphate 5/6 kinase	-1.66223	3.37387	5.94047	0.0234159	0.210805	-3.16505
ENSMUSG00000022439	Parvg	64099	parvin, gamma	-0.800039	7.80658	5.93705	0.0234514	0.210894	-1.74115
ENSMUSG00000009090	Ap1b1	11764	adaptor protein complex AP-1, beta 1 subunit	-0.748706	6.26838	5.93649	0.0234572	0.210894	-1.68028
ENSMUSG00000049488	Tmem67	329795	transmembrane protein 67	-1.94002	4.35232	5.93433	0.0234798	0.210894	-3.83712
ENSMUSG00000031825	Crispld2	78892	cysteine-rich secretory protein LCCL domain containing 2	-4.67516	1.97018	5.93294	0.0234942	0.210894	-25.5484
ENSMUSG00000034403	Pja1	18744	praja ring finger ubiquitin ligase 1	1.3504	4.71069	5.93014	0.0235233	0.210894	2.54984
ENSMUSG00000041241	Mul1	68350	mitochondrial ubiquitin ligase activator of NFKB 1	-1.94624	3.2732	5.92992	0.0235257	0.210894	-3.85369
ENSMUSG00000035095	Fam167a	219148	family with sequence similarity 167, member A	5.75271	-0.260337	6.07052	0.0235588	0.210894	53.9185
ENSMUSG00000006599	Gtf2h1	14884	general transcription factor II H, polypeptide 1	-2.30377	4.16935	5.92613	0.0235651	0.210894	-4.93746
ENSMUSG00000068196	Col8a1	12837	collagen, type VIII, alpha 1	4.94847	0.351713	5.9662	0.0235933	0.210894	30.8773
ENSMUSG00000036580	Spg20	229285	spastic paraplegia 20, spartin (Troyer syndrome) homolog (human)	0.766923	6.2022	5.92174	0.0236111	0.210894	1.70164
ENSMUSG00000021891	Mettl6	67011	methyltransferase like 6	-1.7762	4.3806	5.92109	0.0236179	0.210894	-3.42523
ENSMUSG00000026187	Xrcc5	22596	X-ray repair complementing defective repair in Chinese hamster cells 5	-1.81041	4.78405	5.92011	0.0236281	0.210894	-3.50743
ENSMUSG00000048280	Zfp738	408068	zinc finger protein 738	0.941362	5.01385	5.91895	0.0236403	0.210894	1.92034
ENSMUSG00000051243	Islr2	320563	immunoglobulin superfamily containing leucine-rich repeat 2	5.69553	-0.621743	6.00879	0.0236444	0.210894	51.8232
ENSMUSG00000032192	Gnb5	14697	guanine nucleotide binding protein (G protein), beta 5	-6.00631	0.681494	5.91492	0.0236826	0.21096	-64.2804
ENSMUSG00000038671	Arfrp1	76688	ADP-ribosylation factor related protein 1	1.55597	5.52739	5.91488	0.023683	0.21096	2.94032
ENSMUSG00000020364	Zfp354a	21408	zinc finger protein 354A	-2.62885	3.68697	5.91216	0.0237116	0.211076	-6.18534
ENSMUSG00000070336	Fbxo47	72973	F-box protein 47	-5.50878	-0.0651581	5.99607	0.0237746	0.211341	-45.5312
ENSMUSG00000028071	Sh2d2a	27371	SH2 domain containing 2A	-8.21816	0.282326	6.04806	0.0237848	0.211341	-297.791
ENSMUSG00000028159	Dapp1	26377	dual adaptor for phosphotyrosine and 3-phosphoinositides 1	0.55761	8.10483	5.90488	0.0237883	0.211341	1.47183
ENSMUSG00000010492	Uckl1os	100271841	uridine-cytidine kinase 1-like 1, opposite strand	-3.71144	0.988032	5.89519	0.0238909	0.212084	-13.0995
ENSMUSG00000028688	Toe1	68276	target of EGR1, member 1 (nuclear)	-2.92299	3.193	5.89401	0.0239034	0.212084	-7.58416
ENSMUSG00000023883	Phf10	72057	PHD finger protein 10	0.683028	5.9508	5.8888	0.0239587	0.212373	1.60551
ENSMUSG00000061544	Zfp229	381067	zinc finger protein 229	1.1623	4.33302	5.88799	0.0239674	0.212373	2.23815
ENSMUSG00000032584	Mst1r	19882	macrophage stimulating 1 receptor (c-met-related tyrosine kinase)	-7.35802	-0.722886	6.0868	0.0239943	0.212471	-164.053
ENSMUSG00000036120	Rfxank	19727	regulatory factor X-associated ankyrin-containing protein	1.79157	3.28972	5.88338	0.0240165	0.212471	3.46192
ENSMUSG00000083012	Fam220a	67238	family with sequence similarity 220, member A	4.1383	0.855803	5.92399	0.0240338	0.212471	17.6097
ENSMUSG00000001415	Smg5	229512	Smg-5 homolog, nonsense mediated mRNA decay factor (C. elegans)	1.28425	4.36	5.8796	0.0240569	0.212471	2.43555
ENSMUSG00000048031	Fcrl5	329693	Fc receptor-like 5	7.94832	-0.721464	6.54149	0.0240572	0.212471	246.992
ENSMUSG00000015452	Ager	11596	advanced glycosylation end product-specific receptor	-5.34762	0.3727	5.86978	0.0241621	0.213258	-40.7188
ENSMUSG00000026491	Ahctf1	226747	AT hook containing transcription factor 1	0.767688	7.10254	5.86485	0.0242151	0.213586	1.70254
ENSMUSG00000047678	Gpr82	319200	G protein-coupled receptor 82	-3.27375	2.40648	5.86286	0.0242365	0.213636	-9.67159
ENSMUSG00000032842	Abcc10	224814	ATP-binding cassette, sub-family C (CFTR/MRP), member 10	1.91722	3.1982	5.85923	0.0242757	0.213842	3.77696
ENSMUSG00000080059	Rps19-ps3	277692	ribosomal protein S19, pseudogene 3	-4.75531	-0.479607	5.94626	0.0242925	0.21385	-27.008
ENSMUSG00000032594	Ip6k1	27399	inositol hexaphosphate kinase 1	0.9137	6.28618	5.85371	0.0243354	0.214088	1.88387
ENSMUSG00000096284	Tcstv1	54382	2-cell-stage, variable group, member 1	-5.37749	-0.181585	5.93944	0.0243643	0.214099	-41.5705
ENSMUSG00000031304	Il2rg	16186	interleukin 2 receptor, gamma chain	0.987519	5.37281	5.85006	0.024375	0.214099	1.98277
ENSMUSG00000059923	Grb2	14784	growth factor receptor bound protein 2	0.581884	6.51706	5.84921	0.0243842	0.214099	1.4968
ENSMUSG00000021253	Tgfb3	21809	transforming growth factor, beta 3	5.25204	-0.272807	5.97829	0.0245026	0.214819	38.1084
ENSMUSG00000020680	Taf15	70439	TATA-box binding protein associated factor 15	0.733782	5.59893	5.83603	0.0245277	0.214819	1.66299
ENSMUSG00000000976	Heatr6	217026	HEAT repeat containing 6	-1.26702	5.17026	5.83463	0.024543	0.214819	-2.40664
ENSMUSG00000043962	Thrap3	230753	thyroid hormone receptor associated protein 3	-0.459229	7.68933	5.83439	0.0245456	0.214819	-1.37481
ENSMUSG00000030380	Mzf1	109889	myeloid zinc finger 1	-2.97838	1.28909	5.83244	0.024567	0.214819	-7.88099
ENSMUSG00000003581	Rnf215	71673	ring finger protein 215	-1.42251	3.41029	5.8321	0.0245707	0.214819	-2.68051
ENSMUSG00000065353	Snora73b	100306945	small nucleolar RNA, H/ACA box 73b	-6.55661	-0.898267	5.97017	0.0245877	0.214819	-94.1316
ENSMUSG00000020402	Vdac1	22333	voltage-dependent anion channel 1	0.785287	6.16222	5.83002	0.0245934	0.214819	1.72344
ENSMUSG00000031029	Eif3f	66085	eukaryotic translation initiation factor 3, subunit F	-0.734948	6.09478	5.82516	0.0246468	0.215145	-1.66434
ENSMUSG00000030946	Lhpp	76429	phospholysine phosphohistidine inorganic pyrophosphate phosphatase	3.79642	1.27884	5.82325	0.0246678	0.21519	13.8943
ENSMUSG00000058571	Gpc6	23888	glypican 6	-2.9399	1.77753	5.81611	0.0247464	0.215616	-7.67358
ENSMUSG00000039323	Igfbp2	16008	insulin-like growth factor binding protein 2	4.74705	0.622686	5.81587	0.024749	0.215616	26.8538
ENSMUSG00000053716	Dusp7	235584	dual specificity phosphatase 7	-0.840517	6.64522	5.81397	0.02477	0.215616	-1.79069
ENSMUSG00000037907	Ankrd13b	268445	ankyrin repeat domain 13b	-2.79248	1.90832	5.81302	0.0247805	0.215616	-6.92818
ENSMUSG00000079614	Seh1l	72124	SEH1-like (S. cerevisiae	-0.818459	5.71223	5.80897	0.0248254	0.215867	-1.76352
ENSMUSG00000022564	Grina	66168	glutamate receptor, ionotropic, N-methyl D-aspartate-associated protein 1 (glutamate binding)	-0.668888	6.72292	5.80677	0.0248497	0.215882	-1.58985
ENSMUSG00000021235	Coq6	217707	coenzyme Q6 monooxygenase	-4.14831	1.99752	5.80593	0.024859	0.215882	-17.7323
ENSMUSG00000014778	Fhod1	234686	formin homology 2 domain containing 1	-0.806016	5.56326	5.80393	0.0248812	0.215893	-1.74838
ENSMUSG00000052435	Cebpe	110794	CCAAT/enhancer binding protein (C/EBP), epsilon	-7.65249	-0.175215	5.94021	0.0249047	0.215893	-201.201
ENSMUSG00000060477	Irak2	108960	interleukin-1 receptor-associated kinase 2	-0.510238	6.7399	5.80149	0.0249083	0.215893	-1.42429
ENSMUSG00000056054	S100a8	20201	S100 calcium binding protein A8 (calgranulin A)	-1.45693	6.94214	5.79835	0.0249433	0.215963	-2.74524
ENSMUSG00000033961	Zfp446	269870	zinc finger protein 446	-2.27294	2.66869	5.7977	0.0249505	0.215963	-4.83307
ENSMUSG00000030880	Polr3e	26939	polymerase (RNA) III (DNA directed) polypeptide E	1.59788	4.44717	5.79645	0.0249644	0.215963	3.02698
ENSMUSG00000024885	Aldh3b1	67689	aldehyde dehydrogenase 3 family, member B1	1.65016	3.26004	5.79451	0.0249861	0.216013	3.13869
ENSMUSG00000056214	Pard6g	93737	par-6 family cell polarity regulator gamma	5.31435	-0.869716	5.91813	0.0251412	0.217075	39.7905
ENSMUSG00000009828	Ick	56542	intestinal cell kinase	-1.35278	5.09303	5.77979	0.0251508	0.217075	-2.55403
ENSMUSG00000052926	Rnaseh2a	69724	ribonuclease H2, large subunit	2.84272	3.9853	5.77922	0.0251572	0.217075	7.17374
ENSMUSG00000038520	Tbc1d17	233204	TBC1 domain family, member 17	1.00346	4.66367	5.77407	0.0252151	0.217363	2.00481
ENSMUSG00000040282	BC052040	399568	cDNA sequence BC052040	-3.03579	2.50802	5.7734	0.0252227	0.217363	-8.20095
ENSMUSG00000066441	Rdh11	17252	retinol dehydrogenase 11	-1.85884	3.88072	5.76338	0.0253359	0.218166	-3.62717
ENSMUSG00000025357	Dgka	13139	diacylglycerol kinase, alpha	-1.23324	5.04399	5.7623	0.0253482	0.218166	-2.35095
ENSMUSG00000046312	AI464131	329828	expressed sequence AI464131	-5.39123	0.927749	5.79505	0.0254375	0.218479	-41.9683
ENSMUSG00000022479	Vdr	22337	vitamin D (1,25-dihydroxyvitamin D3) receptor	-6.88157	-1.31203	6.70691	0.0254472	0.218479	-117.912
ENSMUSG00000019370	Calm3	12315	calmodulin 3	1.02155	5.55116	5.75345	0.0254487	0.218479	2.0301
ENSMUSG00000022837	Iqcb1	320299	IQ calmodulin-binding motif containing 1	-1.66442	4.22986	5.75209	0.0254642	0.218479	-3.16987
ENSMUSG00000015854	Cd5l	11801	CD5 antigen-like	-7.11012	-0.540726	5.88815	0.0254665	0.218479	-138.153
ENSMUSG00000020182	Ddc	13195	dopa decarboxylase	-5.67511	-1.05059	5.88665	0.0254829	0.218479	-51.0949
ENSMUSG00000038271	Iffo1	320678	intermediate filament family orphan 1	-0.416065	7.32568	5.74913	0.0254979	0.218479	-1.33428
ENSMUSG00000026608	Kctd3	226823	potassium channel tetramerisation domain containing 3	1.66859	3.90821	5.73796	0.0256257	0.219435	3.17905
ENSMUSG00000030533	Unc45a	101869	unc-45 myosin chaperone A	2.08391	3.0678	5.73642	0.0256433	0.219447	4.23954
ENSMUSG00000049164	Zfp518a	72672	zinc finger protein 518A	-0.821472	7.15188	5.73212	0.0256929	0.219541	-1.76721
ENSMUSG00000033059	Pygb	110078	brain glycogen phosphorylase	-1.19296	5.46433	5.72866	0.0257327	0.219541	-2.28622
ENSMUSG00000062397	Zfp706	68036	zinc finger protein 706	0.726495	7.04087	5.72596	0.0257638	0.219541	1.65461
ENSMUSG00000027459	Fam110a	73847	family with sequence similarity 110, member A	1.16805	4.84273	5.72586	0.025765	0.219541	2.24708
ENSMUSG00000043939	A530064D06Rik	328830	RIKEN cDNA A530064D06 gene	-2.39655	1.75846	5.72421	0.025784	0.219541	-5.26543
ENSMUSG00000049321	Zfp2	22678	zinc finger protein 2	2.18978	3.59324	5.72414	0.0257848	0.219541	4.56236
ENSMUSG00000054910	4931415C17Rik	70966	RIKEN cDNA 4931415C17 gene	-6.45551	-0.969684	5.8073	0.0258055	0.219541	-87.7612
ENSMUSG00000079084	Ccdc82	66396	coiled-coil domain containing 82	1.13056	5.56844	5.7205	0.0258269	0.219541	2.18944
ENSMUSG00000085498	Gm14023	100503468	predicted gene 14023	0.745741	6.77046	5.72041	0.025828	0.219541	1.67684
ENSMUSG00000030876	Mettl9	59052	methyltransferase like 9	-1.51188	4.79621	5.72026	0.0258297	0.219541	-2.85182
ENSMUSG00000022621	Rabl2	68708	RAB, member RAS oncogene family-like 2	3.43548	2.69907	5.7195	0.0258385	0.219541	10.8189
ENSMUSG00000037742	Eef1a1	13627	eukaryotic translation elongation factor 1 alpha 1	0.305405	10.6516	5.71856	0.0258494	0.219541	1.23577
ENSMUSG00000038526	Car14	23831	carbonic anhydrase 14	5.10187	0.0257854	5.70979	0.0259512	0.220089	34.3413
ENSMUSG00000078786	BC024978	414069	cDNA sequence BC024978	1.40993	4.72087	5.70817	0.02597	0.220089	2.65724
ENSMUSG00000034265	Zdhhc14	224454	zinc finger, DHHC domain containing 14	-1.47299	4.38678	5.70801	0.0259719	0.220089	-2.77597
ENSMUSG00000042854	Trp53rkb	76367	transformation related protein 53 regulating kinase B	-2.67863	2.03813	5.70723	0.025981	0.220089	-6.40247
ENSMUSG00000002477	Snrpd1	20641	small nuclear ribonucleoprotein D1	-1.48298	3.96812	5.70599	0.0259954	0.220089	-2.79525
ENSMUSG00000024459	H2-M5	240095	histocompatibility 2, M region locus 5	-8.93825	0.317642	6.21078	0.0260462	0.220215	-490.547
ENSMUSG00000057388	Mrpl18	67681	mitochondrial ribosomal protein L18	1.4801	4.35105	5.70086	0.0260554	0.220215	2.78967
ENSMUSG00000002108	Nr1h3	22259	nuclear receptor subfamily 1, group H, member 3	4.58669	-0.00646196	5.74047	0.0260592	0.220215	24.0288
ENSMUSG00000018476	Kdm6b	216850	KDM1 lysine (K)-specific demethylase 6B	-0.70991	6.20817	5.6989	0.0260783	0.220238	-1.6357
ENSMUSG00000027463	Slc52a3	69698	solute carrier protein family 52, member 3	-7.44705	-0.584006	5.77801	0.0261378	0.22047	-174.496
ENSMUSG00000004814	Ccl24	56221	chemokine (C-C motif) ligand 24	-2.69045	3.12439	5.69358	0.0261405	0.22047	-6.45515
ENSMUSG00000074994	Qser1	99003	glutamine and serine rich 1	-0.85751	6.91553	5.69238	0.0261547	0.22047	-1.81191
ENSMUSG00000020949	Fkbp3	30795	FK506 binding protein 3	0.968808	5.24977	5.68947	0.0261889	0.220599	1.95722
ENSMUSG00000074466	Gm15417	545539	predicted gene 15417	-4.04531	1.04223	5.68627	0.0262265	0.220599	-16.5105
ENSMUSG00000063558	Aox1	11761	aldehyde oxidase 1	2.76433	1.9268	5.68395	0.0262538	0.220599	6.79433
ENSMUSG00000032826	Ank2	109676	ankyrin 2, brain	1.06276	7.0181	5.68331	0.0262614	0.220599	2.08892
ENSMUSG00000019558	Slc6a8	102857	solute carrier family 6 (neurotransmitter transporter, creatine), member 8	2.22371	3.02018	5.68314	0.0262633	0.220599	4.67091
ENSMUSG00000039936	Pik3cd	18707	phosphatidylinositol-4,5-bisphosphate 3-kinase catalytic subunit delta	0.515208	6.84795	5.68274	0.0262681	0.220599	1.4292
ENSMUSG00000025027	Xpnpep1	170750	X-prolyl aminopeptidase (aminopeptidase P) 1, soluble	-0.943938	4.86612	5.67871	0.0263157	0.220862	-1.92377
ENSMUSG00000051344	Plekhm3	241075	pleckstrin homology domain containing, family M, member 3	0.701554	7.16454	5.6763	0.0263441	0.220963	1.62626
ENSMUSG00000044676	Zfp612	234725	zinc finger protein 612	-5.6056	0.35238	5.70704	0.0264484	0.2217	-48.6917
ENSMUSG00000028469	Npr2	230103	natriuretic peptide receptor 2	5.52277	-0.372585	5.79181	0.0265445	0.222322	45.9747
ENSMUSG00000035298	Klhl35	72184	kelch-like 35	-4.0665	0.239477	5.6581	0.0265606	0.222322	-16.7548
ENSMUSG00000098905	Zfp953	629016	zinc finger protein 953	-2.80449	4.22829	5.65714	0.026572	0.222322	-6.98611
ENSMUSG00000046056	Sbsn	282619	suprabasin	-4.85645	1.85044	5.65164	0.0266378	0.222735	-28.9693
ENSMUSG00000022553	Maf1	68877	MAF1 homolog, negative regulator of RNA polymerase III	-1.16178	4.45289	5.64911	0.0266681	0.222851	-2.23733
ENSMUSG00000042390	Gatad2b	229542	GATA zinc finger domain containing 2B	-0.596718	6.90344	5.64595	0.0267061	0.222893	-1.51227
ENSMUSG00000028176	Lrrc7	242274	leucine rich repeat containing 7	7.01255	-0.789879	5.77633	0.0267225	0.222893	129.119
ENSMUSG00000029392	Rilpl1	75695	Rab interacting lysosomal protein-like 1	0.741885	6.00064	5.64375	0.0267325	0.222893	1.67236
ENSMUSG00000098369	Gm2274	100039503	predicted gene 2274	-5.98474	0.979965	5.72606	0.0267392	0.222893	-63.3267
ENSMUSG00000051246	Msantd1	403174	Myb/SANT-like DNA-binding domain containing 1	-6.51516	0.464997	5.71993	0.0268111	0.223355	-91.4656
ENSMUSG00000068394	Cep152	99100	centrosomal protein 152	-1.21427	4.64786	5.63382	0.0268523	0.22345	-2.32023
ENSMUSG00000002250	Ppard	19015	peroxisome proliferator activator receptor delta	-1.30322	5.17553	5.63354	0.0268557	0.22345	-2.46779
ENSMUSG00000042595	Fam199x	245622	family with sequence similarity 199, X-linked	-1.32979	4.34248	5.63032	0.0268946	0.22355	-2.51366
ENSMUSG00000059436	Max	17187	Max protein	-0.625477	7.80379	5.62981	0.0269008	0.22355	-1.54272
ENSMUSG00000000088	Cox5a	12858	cytochrome c oxidase subunit 5A	1.84698	4.02626	5.62805	0.0269221	0.22359	3.59747
ENSMUSG00000024099	Ndufv2	72900	NADH:ubiquinone oxidoreductase core subunit V2	-1.11111	4.29539	5.62456	0.0269645	0.223756	-2.16012
ENSMUSG00000030245	Golt1b	66964	golgi transport 1B	1.17946	5.69629	5.62367	0.0269753	0.223756	2.26493
ENSMUSG00000027360	Hdc	15186	histidine decarboxylase	-1.3518	6.68684	5.62041	0.0270149	0.223947	-2.5523
ENSMUSG00000010554	Mettl16	67493	methyltransferase like 16	1.0013	5.60756	5.61556	0.027074	0.224299	2.0018
ENSMUSG00000084804	1700095J12Rik	73563	RIKEN cDNA 1700095J12 gene	4.07818	0.6479	5.65274	0.0270946	0.224332	16.891
ENSMUSG00000034930	Rtkn	20166	rhotekin	-7.58204	-0.535457	5.92148	0.0272053	0.224688	-191.612
ENSMUSG00000034290	Nek9	217718	NIMA (never in mitosis gene a)-related expressed kinase 9	0.628536	6.93806	5.60452	0.0272091	0.224688	1.546
ENSMUSG00000003134	Tbc1d8	54610	TBC1 domain family, member 8	0.733957	6.12839	5.60423	0.0272127	0.224688	1.66319
ENSMUSG00000063888	Rpl7l1	66229	ribosomal protein L7-like 1	1.14989	4.95746	5.60294	0.0272286	0.224688	2.21898
ENSMUSG00000032398	Snapc5	330959	small nuclear RNA activating complex, polypeptide 5	-1.16254	4.78562	5.60291	0.027229	0.224688	-2.23851
ENSMUSG00000052299	Ltn1	78913	listerin E3 ubiquitin protein ligase 1	0.674296	7.02572	5.60221	0.0272375	0.224688	1.59582
ENSMUSG00000025732	Mcrip2	68241	MAPK regulated corepressor interacting protein 2	-5.28751	-0.47726	5.68236	0.0272571	0.224713	-39.0571
ENSMUSG00000040007	Bahd1	228536	bromo adjacent homology domain containing 1	1.88068	3.8179	5.59913	0.0272754	0.224726	3.68248
ENSMUSG00000023044	Csad	246277	cysteine sulfinic acid decarboxylase	-1.61849	4.88633	5.59662	0.0273063	0.224844	-3.07053
ENSMUSG00000008668	Rps18	20084	ribosomal protein S18	0.470791	6.80122	5.58886	0.027402	0.225495	1.38587
ENSMUSG00000025747	Tyms	22171	thymidylate synthase	-0.946799	5.3371	5.5857	0.0274412	0.225679	-1.92759
ENSMUSG00000036504	Phpt1	75454	phosphohistidine phosphatase 1	1.63656	3.31804	5.58193	0.0274878	0.225801	3.10923
ENSMUSG00000004902	Slc25a18	71803	solute carrier family 25 (mitochondrial carrier), member 18	-5.65558	-0.566597	5.66307	0.0274893	0.225801	-50.4081
ENSMUSG00000029701	Rbm28	68272	RNA binding motif protein 28	0.705824	6.26464	5.58028	0.0275084	0.225806	1.63108
ENSMUSG00000057667	Bloc1s3	232946	biogenesis of lysosomal organelles complex-1, subunit 3	1.80084	2.90883	5.57852	0.0275302	0.225806	3.48423
ENSMUSG00000029036	Atad3a	108888	ATPase family, AAA domain containing 3A	-1.35362	4.41746	5.57661	0.0275541	0.225806	-2.55553
ENSMUSG00000078485	Plekhn1	231002	pleckstrin homology domain containing, family N member 1	1.502	3.54911	5.57638	0.0275568	0.225806	2.83235
ENSMUSG00000035045	Zc3h12b	547176	zinc finger CCCH-type containing 12B	0.857452	4.90713	5.57266	0.0276032	0.225913	1.81184
ENSMUSG00000064065	Ipcef1	320495	interaction protein for cytohesin exchange factors 1	-0.857007	5.99394	5.57213	0.0276098	0.225913	-1.81128
ENSMUSG00000029402	Snrnp35	76167	small nuclear ribonucleoprotein 35 (U11/U12)	2.14651	3.59176	5.57045	0.0276308	0.225913	4.42756
ENSMUSG00000029551	Psmg3	66506	proteasome (prosome, macropain) assembly chaperone 3	-3.26579	1.8755	5.56924	0.0276459	0.225913	-9.61837
ENSMUSG00000057234	Mettl15	76894	methyltransferase like 15	-3.56695	1.50082	5.56862	0.0276536	0.225913	-11.8511
ENSMUSG00000031563	Wwc2	52357	WW, C2 and coiled-coil domain containing 2	-1.40011	4.49538	5.56374	0.0277148	0.226276	-2.63921
ENSMUSG00000033717	Adra2a	11551	adrenergic receptor, alpha 2a	-4.89371	0.277298	5.5992	0.0277492	0.226327	-29.7271
ENSMUSG00000097047	1110020A21Rik	68531	RIKEN cDNA 1110020A21 gene	5.25489	-0.748461	5.74237	0.0277546	0.226327	38.1837
ENSMUSG00000070520	Nsmce3	66647	NSE3 homolog, SMC5-SMC6 complex component	2.12743	3.62303	5.55902	0.0277739	0.226348	4.36938
ENSMUSG00000071644	Eef1g	67160	eukaryotic translation elongation factor 1 gamma	-0.410073	7.51296	5.55718	0.027797	0.226368	-1.32875
ENSMUSG00000021589	Rhobtb3	73296	Rho-related BTB domain containing 3	-7.51517	0.106367	5.63675	0.0278099	0.226368	-182.933
ENSMUSG00000051730	Mettl5	75422	methyltransferase like 5	-1.72345	4.03909	5.55315	0.0278477	0.226395	-3.30224
ENSMUSG00000071489	Ptgdr	19214	prostaglandin D receptor	-7.80295	-0.511105	5.79471	0.0278529	0.226395	-223.317
ENSMUSG00000032578	Cish	12700	cytokine inducible SH2-containing protein	3.58801	0.339353	5.55189	0.0278635	0.226395	12.0254
ENSMUSG00000047635	2810006K23Rik	72650	RIKEN cDNA 2810006K23 gene	1.733	4.79286	5.54313	0.0279742	0.227101	3.32419
ENSMUSG00000034321	Exosc1	66583	exosome component 1	1.54063	4.03453	5.54062	0.0280059	0.227101	2.90922
ENSMUSG00000054519	Zfp867	237775	zinc finger protein 867	2.45334	2.90578	5.54059	0.0280064	0.227101	5.47683
ENSMUSG00000020687	Cdc27	217232	cell division cycle 27	-0.52179	6.79968	5.53958	0.0280192	0.227101	-1.43574
ENSMUSG00000009073	Nf2	18016	neurofibromin 2	0.683356	5.94582	5.53838	0.0280344	0.227101	1.60587
ENSMUSG00000028763	Hspg2	15530	perlecan (heparan sulfate proteoglycan 2)	-5.05272	1.07161	5.53572	0.0280681	0.227237	-33.191
ENSMUSG00000096655	1700065D16Rik	73410	RIKEN cDNA 1700065D16 gene	4.69181	-0.544292	5.57227	0.0280852	0.227239	25.845
ENSMUSG00000017978	Cadps2	320405	Ca2+-dependent activator protein for secretion 2	-7.22289	-0.405199	5.60394	0.0282153	0.228156	-149.385
ENSMUSG00000026158	Ogfrl1	70155	opioid growth factor receptor-like 1	0.427476	8.37265	5.52182	0.0282454	0.228262	1.34488
ENSMUSG00000025155	Dus1l	68730	dihydrouridine synthase 1-like (S. cerevisiae)	-1.56495	3.3382	5.51985	0.0282705	0.228329	-2.95866
ENSMUSG00000015095	Fbxw5	30839	F-box and WD-40 domain protein 5	0.921047	5.13404	5.51544	0.0283272	0.228649	1.89349
ENSMUSG00000037725	Ckap2	80986	cytoskeleton associated protein 2	-5.55883	-0.251676	5.51044	0.0283914	0.229001	-47.1382
ENSMUSG00000034936	Arl4d	80981	ADP-ribosylation factor-like 4D	-5.75656	-0.83371	5.58879	0.0284047	0.229001	-54.0627
ENSMUSG00000084960	B430010I23Rik	78849	RIKEN cDNA B430010I23 gene	-1.49151	4.98826	5.50719	0.0284333	0.229095	-2.81182
ENSMUSG00000031545	Gpat4	102247	glycerol-3-phosphate acyltransferase 4	-1.98026	4.7109	5.50453	0.0284675	0.229149	-3.94564
ENSMUSG00000064090	Vrk2	69922	vaccinia related kinase 2	0.891939	5.3248	5.50384	0.0284764	0.229149	1.85567
ENSMUSG00000019802	Sec63	140740	SEC63-like (S. cerevisiae)	-0.575113	7.15067	5.50238	0.0284954	0.229149	-1.48979
ENSMUSG00000000305	Cdh4	12561	cadherin 4	5.69453	-0.593174	5.62724	0.0285079	0.229149	51.7874
ENSMUSG00000037544	Dlgap5	218977	DLG associated protein 5	-2.09918	2.93364	5.49537	0.028586	0.229394	-4.28465
ENSMUSG00000025066	Sfr1	67788	SWI5 dependent recombination repair 1	0.950147	5.65457	5.49516	0.0285888	0.229394	1.93207
ENSMUSG00000046668	Cxxc5	67393	CXXC finger 5	-0.749321	6.02745	5.4946	0.0285961	0.229394	-1.681
ENSMUSG00000014329	Bicc1	83675	BicC family RNA binding protein 1	-6.07972	-1.04112	5.61746	0.0286296	0.229394	-67.636
ENSMUSG00000029433	Diablo	66593	diablo, IAP-binding mitochondrial protein	0.90879	5.75342	5.49096	0.0286433	0.229394	1.87747
ENSMUSG00000048481	Mypop	232934	Myb-related transcription factor, partner of profilin	-5.18763	-0.407644	5.56957	0.0286472	0.229394	-36.4445
ENSMUSG00000027209	Fam227b	75823	family with sequence similarity 227, member B	5.92887	-0.908148	5.61391	0.028674	0.229394	60.921
ENSMUSG00000018442	Derl2	116891	Der1-like domain family, member 2	0.811521	6.57832	5.48858	0.0286743	0.229394	1.75506
ENSMUSG00000071078	Nr2c2ap	75692	nuclear receptor 2C2-associated protein	2.85522	2.34446	5.48623	0.0287048	0.22948	7.23615
ENSMUSG00000027091	Zc3h15	69082	zinc finger CCCH-type containing 15	-0.996094	5.74494	5.48515	0.028719	0.22948	-1.99459
ENSMUSG00000027115	Kif18a	228421	kinesin family member 18A	-1.19572	3.73726	5.48162	0.0287651	0.229506	-2.29059
ENSMUSG00000027544	Nfatc2	18019	nuclear factor of activated T cells, cytoplasmic, calcineurin dependent 2	-0.475863	7.1471	5.48045	0.0287802	0.229506	-1.39075
ENSMUSG00000021965	Ska3	219114	spindle and kinetochore associated complex subunit 3	-2.20583	2.89842	5.47991	0.0287874	0.229506	-4.61341
ENSMUSG00000032258	Lca5	75782	Leber congenital amaurosis 5 (human)	4.14055	0.807626	5.51692	0.0287902	0.229506	17.6372
ENSMUSG00000015659	Serac1	321007	serine active site containing 1	1.74529	4.78144	5.47837	0.0288075	0.229508	3.35263
ENSMUSG00000052248	Zeb2os	433424	zinc finger E-box binding homeobox 2, opposite strand	-1.14874	5.4053	5.47383	0.028867	0.229763	-2.21721
ENSMUSG00000031891	Hsd11b2	15484	hydroxysteroid 11-beta dehydrogenase 2	-4.4045	0.282152	5.47333	0.0288735	0.229763	-21.1781
ENSMUSG00000032285	Dnaja4	58233	DnaJ heat shock protein family (Hsp40) member A4	2.61072	2.67574	5.47036	0.0289125	0.229938	6.10809
ENSMUSG00000054423	Cadps	27062	Ca2+-dependent secretion activator	5.77098	-0.197788	5.46659	0.028962	0.230196	54.6058
ENSMUSG00000071181	3830408C21Rik	100040322	RIKEN cDNA 3830408C21 gene	-6.68486	-1.13106	5.58442	0.0290453	0.230722	-102.883
ENSMUSG00000025558	Dock9	105445	dedicator of cytokinesis 9	0.785833	6.30218	5.45626	0.0290983	0.230918	1.72409
ENSMUSG00000000743	Chmp1a	234852	charged multivesicular body protein 1A	1.2833	3.94787	5.45559	0.0291072	0.230918	2.43395
ENSMUSG00000033676	Gabrb3	14402	gamma-aminobutyric acid (GABA) A receptor, subunit beta 3	6.63742	0.272275	5.57753	0.0291328	0.230918	99.5549
ENSMUSG00000037617	Spag1	26942	sperm associated antigen 1	-3.21492	2.01124	5.45284	0.0291436	0.230918	-9.28513
ENSMUSG00000032218	Ccnb2	12442	cyclin B2	-3.82628	2.66056	5.45094	0.0291687	0.230918	-14.1848
ENSMUSG00000039929	Urb1	207932	URB1 ribosome biogenesis 1 homolog (S. cerevisiae)	1.7669	4.07003	5.45066	0.0291726	0.230918	3.40321
ENSMUSG00000029802	Abcg2	26357	ATP binding cassette subfamily G member 2 (Junior blood group)	-0.996315	5.42264	5.44903	0.0291942	0.230954	-1.9949
ENSMUSG00000021356	Irf4	16364	interferon regulatory factor 4	-0.983888	5.25287	5.44415	0.0292591	0.23129	-1.97779
ENSMUSG00000021959	Lats2	50523	large tumor suppressor 2	0.73518	6.70327	5.44231	0.0292835	0.23129	1.66461
ENSMUSG00000062151	Unc13c	208898	unc-13 homolog C	-7.60054	-0.0046204	5.56362	0.0293106	0.23129	-194.085
ENSMUSG00000048856	Slc25a47	104910	solute carrier family 25, member 47	-5.70162	-0.976004	5.56347	0.0293125	0.23129	-52.0424
ENSMUSG00000037095	Lrg1	76905	leucine-rich alpha-2-glycoprotein 1	-4.11651	1.13767	5.43941	0.0293222	0.23129	-17.3458
ENSMUSG00000033060	Lmo7	380928	LIM domain only 7	5.79388	-0.871342	5.55579	0.0294112	0.231855	55.4795
ENSMUSG00000004665	Cnn2	12798	calponin 2	-1.29378	3.96973	5.43123	0.0294315	0.231881	-2.45169
ENSMUSG00000018415	Gid4	66771	GID complex subunit 4, VID24 homolog	1.41175	5.22493	5.42947	0.0294552	0.231931	2.6606
ENSMUSG00000034551	Hdx	245596	highly divergent homeobox	-8.12121	-0.134684	5.65993	0.0294794	0.231987	-278.438
ENSMUSG00000022295	Atp6v1c1	66335	ATPase, H+ transporting, lysosomal V1 subunit C1	0.60894	6.89619	5.42242	0.0295499	0.232406	1.52514
ENSMUSG00000034032	Rpap1	68925	RNA polymerase II associated protein 1	-1.41546	3.7053	5.42024	0.0295792	0.232501	-2.66744
ENSMUSG00000078681	Tm2d3	68634	TM2 domain containing 3	-1.80854	3.55328	5.41808	0.0296084	0.232595	-3.50289
ENSMUSG00000035357	Pdzrn3	55983	PDZ domain containing RING finger 3	6.98964	-0.745741	5.78681	0.0296773	0.233002	127.084
ENSMUSG00000030823	9130019O22Rik	78921	RIKEN cDNA 9130019O22 gene	-3.15889	2.47461	5.40727	0.0297546	0.233294	-8.93144
ENSMUSG00000020009	Ifngr1	15979	interferon gamma receptor 1	0.333648	8.93808	5.40479	0.0297883	0.233294	1.2602
ENSMUSG00000029826	Zc3hav1	78781	zinc finger CCCH type, antiviral 1	0.567961	7.45118	5.40456	0.0297914	0.233294	1.48243
ENSMUSG00000022365	Derl1	67819	Der1-like domain family, member 1	-0.858143	6.71844	5.4034	0.0298071	0.233294	-1.8127
ENSMUSG00000018160	Med1	19014	mediator complex subunit 1	0.545876	8.06084	5.40309	0.0298114	0.233294	1.45991
ENSMUSG00000033446	Lpar6	67168	lysophosphatidic acid receptor 6	0.588709	7.18724	5.40258	0.0298182	0.233294	1.5039
ENSMUSG00000046768	Rhoj	80837	ras homolog family member J	-5.51892	-0.460547	5.43613	0.0298553	0.23336	-45.8522
ENSMUSG00000000561	Wdr77	70465	WD repeat domain 77	1.35203	5.17258	5.39942	0.0298613	0.23336	2.55271
ENSMUSG00000078144	Capns2	69543	calpain, small subunit 2	-1.57033	3.51819	5.39549	0.0299148	0.233644	-2.96972
ENSMUSG00000023025	Larp4	207214	La ribonucleoprotein domain family, member 4	-0.582163	7.46044	5.39136	0.0299712	0.233924	-1.49709
ENSMUSG00000056399	Prss34	328780	protease, serine 34	-6.51731	0.37867	5.51165	0.0299853	0.233924	-91.6019
ENSMUSG00000047907	Tshz2	228911	teashirt zinc finger family member 2	-7.11611	-0.794674	5.46298	0.0300348	0.23404	-138.727
ENSMUSG00000042428	Mgat3	17309	mannoside acetylglucosaminyltransferase 3	5.92111	0.0144177	5.38614	0.0300428	0.23404	60.5944
ENSMUSG00000032204	Aqp9	64008	aquaporin 9	3.71315	2.197	5.38544	0.0300523	0.23404	13.115
ENSMUSG00000059900	Tmem40	94346	transmembrane protein 40	5.36155	1.77009	5.41785	0.0301024	0.234295	41.1138
ENSMUSG00000001270	Ckb	12709	creatine kinase, brain	0.387425	7.57995	5.37869	0.030145	0.234358	1.30806
ENSMUSG00000030020	Prickle2	243548	prickle planar cell polarity protein 2	3.86116	0.226237	5.37619	0.0301795	0.234358	14.532
ENSMUSG00000051671	Coa6	67892	cytochrome c oxidase assembly factor 6	-3.31018	1.31041	5.37114	0.0302492	0.234358	-9.91887
ENSMUSG00000038500	Prr3	75210	proline-rich polypeptide 3	-1.5653	3.64509	5.37097	0.0302515	0.234358	-2.95939
ENSMUSG00000050910	Cdr2l	237988	cerebellar degeneration-related protein 2-like	-5.09782	-0.0335749	5.40671	0.030254	0.234358	-34.2449
ENSMUSG00000046591	Ticrr	77011	TOPBP1-interacting checkpoint and replication regulator	-5.2159	1.19114	5.36818	0.0302901	0.234358	-37.1656
ENSMUSG00000027353	Mcm8	66634	minichromosome maintenance 8 homologous recombination repair factor	-3.57004	1.00688	5.36755	0.0302988	0.234358	-11.8765
ENSMUSG00000037032	Apbb1	11785	amyloid beta (A4) precursor protein-binding, family B, member 1	-3.19933	1.41984	5.3656	0.0303258	0.234358	-9.1853
ENSMUSG00000032105	Pdzd3	170761	PDZ domain containing 3	-8.12592	-0.286698	5.82111	0.0303297	0.234358	-279.348
ENSMUSG00000047824	Pygo2	68911	pygopus 2	1.54321	4.24263	5.36313	0.0303601	0.234358	2.91442
ENSMUSG00000028431	Elp1	230233	elongator complex protein 1	0.809166	5.67681	5.36211	0.0303743	0.234358	1.7522
ENSMUSG00000042625	Safb2	224902	scaffold attachment factor B2	-0.532111	7.0705	5.36086	0.0303917	0.234358	-1.44604
ENSMUSG00000050592	Fam78a	241303	family with sequence similarity 78, member A	1.32646	3.46812	5.36042	0.0303977	0.234358	2.50787
ENSMUSG00000032232	Cgnl1	68178	cingulin-like 1	5.06517	1.42813	5.39578	0.0304038	0.234358	33.4786
ENSMUSG00000024843	Chka	12660	choline kinase alpha	0.761817	6.45344	5.35908	0.0304164	0.234358	1.69563
ENSMUSG00000040481	Bptf	207165	bromodomain PHD finger transcription factor	-0.395072	8.29634	5.3572	0.0304425	0.234358	-1.31501
ENSMUSG00000026857	Ntmt1	66617	N-terminal Xaa-Pro-Lys N-methyltransferase 1	-2.38326	1.82751	5.35711	0.0304437	0.234358	-5.21715
ENSMUSG00000047496	Rnf152	320311	ring finger protein 152	5.25578	-0.34454	5.52709	0.0304448	0.234358	38.2073
ENSMUSG00000036790	Slitrk2	245450	SLIT and NTRK-like family, member 2	4.16431	1.2706	5.35399	0.0304872	0.234358	17.93
ENSMUSG00000003477	Inmt	21743	indolethylamine N-methyltransferase	-6.56453	-1.14356	5.58033	0.030491	0.234358	-94.6502
ENSMUSG00000002699	Lcp2	16822	lymphocyte cytosolic protein 2	-0.464974	8.57558	5.35334	0.0304963	0.234358	-1.38029
ENSMUSG00000004771	Rab11a	53869	RAB11A, member RAS oncogene family	-0.890246	5.97712	5.35282	0.0305035	0.234358	-1.85349
ENSMUSG00000039716	Dock3	208869	dedicator of cyto-kinesis 3	2.91283	1.47085	5.35177	0.0305182	0.234358	7.53094
ENSMUSG00000026721	Rabgap1l	29809	RAB GTPase activating protein 1-like	1.51551	4.69403	5.34899	0.0305569	0.234358	2.85899
ENSMUSG00000027574	Nkain4	58237	Na+/K+ transporting ATPase interacting 4	5.52092	-0.103966	5.38435	0.0305611	0.234358	45.9158
ENSMUSG00000085761	4930455G09Rik	78917	RIKEN cDNA 4930455G09 gene	-6.02284	0.0808048	5.63879	0.0305728	0.234358	-65.0212
ENSMUSG00000023940	Sgo1	72415	shugoshin 1	4.28181	1.59523	5.38279	0.0305827	0.234358	19.4515
ENSMUSG00000040473	Cfap69	207686	cilia and flagella associated protein 69	-6.54023	-0.0914991	5.46455	0.0306122	0.234358	-93.0689
ENSMUSG00000020627	Klhl29	208439	kelch-like 29	-7.09564	-0.171607	5.41954	0.030622	0.234358	-136.773
ENSMUSG00000047963	Stbd1	52331	starch binding domain 1	-3.91021	1.62073	5.34284	0.0306431	0.234358	-15.0346
ENSMUSG00000026289	Atg16l1	77040	autophagy related 16-like 1 (S. cerevisiae)	-0.72813	5.6129	5.34125	0.0306653	0.234358	-1.65649
ENSMUSG00000052407	Ccdc171	320226	coiled-coil domain containing 171	-1.78141	3.57064	5.34064	0.0306739	0.234358	-3.43762
ENSMUSG00000037681	Esyt3	272636	extended synaptotagmin-like protein 3	-5.71175	-0.881713	5.45929	0.0306831	0.234358	-52.4092
ENSMUSG00000042249	Grk3	320129	G protein-coupled receptor kinase 3	0.659585	5.84842	5.33798	0.0307113	0.234441	1.57963
ENSMUSG00000025289	Prdx4	53381	peroxiredoxin 4	1.61617	3.6294	5.33152	0.0308023	0.234939	3.0656
ENSMUSG00000019795	Pcmt1	18537	protein-L-isoaspartate (D-aspartate) O-methyltransferase 1	0.709966	6.36796	5.33087	0.0308114	0.234939	1.63577
ENSMUSG00000035601	Trmt10b	69934	tRNA methyltransferase 10B	2.39395	3.2947	5.32794	0.0308527	0.235107	5.25596
ENSMUSG00000027236	Eif3j1	78655	eukaryotic translation initiation factor 3, subunit J1	0.777868	6.23448	5.32684	0.0308683	0.235107	1.7146
ENSMUSG00000052957	Gas1	14451	growth arrest specific 1	5.0612	-0.378831	5.49177	0.030914	0.235323	33.3867
ENSMUSG00000073792	Alg6	320438	asparagine-linked glycosylation 6 (alpha-1,3,-glucosyltransferase)	-1.47507	4.68614	5.31546	0.0310296	0.23607	-2.77997
ENSMUSG00000044066	Cep68	216543	centrosomal protein 68	-0.675696	7.74717	5.30894	0.0311226	0.236341	-1.59737
ENSMUSG00000031487	Brf2	66653	BRF2, RNA polymerase III transcription initiation factor 50kDa subunit	-4.3719	-0.341798	5.42601	0.0311362	0.236341	-20.7049
ENSMUSG00000028552	Eps15	13858	epidermal growth factor receptor pathway substrate 15	-0.476871	7.86107	5.3061	0.031163	0.236341	-1.39172
ENSMUSG00000097080	1700086O06Rik	73516	RIKEN cDNA 1700086O06 gene	-6.82776	-0.514935	5.42399	0.031164	0.236341	-113.595
ENSMUSG00000032305	Fam219b	78323	family with sequence similarity 219, member B	-1.1996	4.61098	5.30587	0.0311663	0.236341	-2.29676
ENSMUSG00000026773	Pfkfb3	170768	6-phosphofructo-2-kinase/fructose-2,6-biphosphatase 3	0.441272	8.39797	5.30516	0.0311765	0.236341	1.3578
ENSMUSG00000060639	Hist1h4i	319158	histone cluster 1, H4i	-6.23276	-1.41167	5.47145	0.0311878	0.236341	-75.2052
ENSMUSG00000024824	Rad9a	19367	RAD9 checkpoint clamp component A	-1.20986	5.08998	5.30284	0.0312097	0.236375	-2.31315
ENSMUSG00000032011	Thy1	21838	thymus cell antigen 1, theta	-6.01466	-0.928866	5.37224	0.0312762	0.236746	-64.6538
ENSMUSG00000043279	Trim56	384309	tripartite motif-containing 56	0.531504	7.04359	5.29333	0.031346	0.237065	1.44544
ENSMUSG00000034910	Pygo1	72135	pygopus 1	2.72196	1.63215	5.29148	0.0313727	0.237065	6.59767
ENSMUSG00000049130	C5ar1	12273	complement component 5a receptor 1	-0.483037	7.38644	5.29066	0.0313845	0.237065	-1.39768
ENSMUSG00000052698	Tln2	70549	talin 2	0.786877	6.34556	5.28842	0.0314168	0.237065	1.72534
ENSMUSG00000046798	Cldn12	64945	claudin 12	-2.5574	2.79726	5.28701	0.0314371	0.237065	-5.88646
ENSMUSG00000049751	Rpl36al	66483	ribosomal protein L36A-like	0.608834	7.01329	5.28678	0.0314404	0.237065	1.52503
ENSMUSG00000020840	Blmh	104184	bleomycin hydrolase	-0.875433	5.52325	5.28672	0.0314414	0.237065	-1.83456
ENSMUSG00000046404	Yod1	226418	YOD1 deubiquitinase	1.08486	4.04947	5.28492	0.0314672	0.237128	2.12117
ENSMUSG00000031971	Ccsap	73420	centriole, cilia and spindle associated protein	-6.25473	-0.326387	5.39512	0.0315636	0.237722	-76.3594
ENSMUSG00000096233	Gm13238	236069	carnitine deficiency-associated gene expressed in ventricle 3 pseudogene	-4.68383	0.282772	5.31034	0.0316031	0.23784	-25.7023
ENSMUSG00000044149	Nkrf	77286	NF-kappaB repressing factor	-2.91662	3.92161	5.27475	0.0316145	0.23784	-7.55077
ENSMUSG00000026389	Steap3	68428	STEAP family member 3	-3.87671	0.907847	5.26756	0.0317191	0.238441	-14.6895
ENSMUSG00000093938	Evi2b	216984	ecotropic viral integration site 2b	-0.656807	6.84238	5.26597	0.0317424	0.238441	-1.57659
ENSMUSG00000023048	Prr13	66151	proline rich 13	0.583026	5.9641	5.26562	0.0317474	0.238441	1.49799
ENSMUSG00000004328	Hif3a	53417	hypoxia inducible factor 3, alpha subunit	3.0791	1.58658	5.26126	0.0318111	0.238698	8.45087
ENSMUSG00000023805	Synj2	20975	synaptojanin 2	1.12404	5.21548	5.26086	0.0318169	0.238698	2.17956
ENSMUSG00000027822	Slc33a1	11416	solute carrier family 33 (acetyl-CoA transporter), member 1	-1.16053	4.67164	5.25369	0.0319221	0.239354	-2.23539
ENSMUSG00000004892	Bcan	12032	brevican	-4.29021	0.862821	5.25232	0.0319422	0.239371	-19.5651
ENSMUSG00000006369	Fbln1	14114	fibulin 1	-5.78207	-0.318193	5.36663	0.0319637	0.239381	-55.0271
ENSMUSG00000027661	Slc2a10	170441	solute carrier family 2 (facilitated glucose transporter), member 10	4.44611	0.00306484	5.28403	0.031983	0.239381	21.7977
ENSMUSG00000030317	Timp4	110595	tissue inhibitor of metalloproteinase 4	4.63307	-0.200607	5.24781	0.0320084	0.239381	24.8139
ENSMUSG00000035929	H2-Q4	15015	histocompatibility 2, Q region locus 4	0.745915	5.08583	5.24741	0.0320144	0.239381	1.67704
ENSMUSG00000042510	AA986860	212439	expressed sequence AA986860	-5.30729	-0.671281	5.35739	0.0320945	0.239682	-39.5961
ENSMUSG00000025878	Uimc1	20184	ubiquitin interaction motif containing 1	-0.887071	5.83792	5.24172	0.0320982	0.239682	-1.84942
ENSMUSG00000007039	Ddah2	51793	dimethylarginine dimethylaminohydrolase 2	1.75883	3.81238	5.24107	0.0321079	0.239682	3.38423
ENSMUSG00000015094	Npdc1	18146	neural proliferation, differentiation and control 1	4.38791	-0.353093	5.23531	0.0321931	0.240054	20.9359
ENSMUSG00000025092	Hspa12a	73442	heat shock protein 12A	2.51149	5.11774	5.2353	0.0321933	0.240054	5.70208
ENSMUSG00000048368	Omd	27047	osteomodulin	-7.76471	-0.479816	5.66716	0.0322457	0.240313	-217.476
ENSMUSG00000032342	Mto1	68291	mitochondrial tRNA translation optimization 1	1.09916	5.30294	5.22742	0.0323102	0.24066	2.1423
ENSMUSG00000036435	Exoc1	69940	exocyst complex component 1	-0.79416	6.27804	5.22464	0.0323517	0.240735	-1.73407
ENSMUSG00000030752	Kdm8	77035	lysine (K)-specific demethylase 8	3.99571	0.447399	5.22367	0.0323661	0.240735	15.9525
ENSMUSG00000015711	Prune1	229589	prune exopolyphosphatase	1.44832	3.76436	5.22248	0.0323839	0.240735	2.72891
ENSMUSG00000032244	Fem1b	14155	feminization 1 homolog b (C. elegans)	0.56458	6.66498	5.22151	0.0323982	0.240735	1.47896
ENSMUSG00000074896	Ifit3	15959	interferon-induced protein with tetratricopeptide repeats 3	1.31618	5.32593	5.22001	0.0324207	0.240735	2.49006
ENSMUSG00000022814	Umps	22247	uridine monophosphate synthetase	1.12812	5.07577	5.21957	0.0324273	0.240735	2.18574
ENSMUSG00000034566	Atp5h	71679	ATP synthase, H+ transporting, mitochondrial F0 complex, subunit D	0.72594	5.88711	5.21249	0.0325332	0.241187	1.65398
ENSMUSG00000038084	Opa1	74143	OPA1, mitochondrial dynamin like GTPase	0.479286	6.81363	5.21203	0.0325401	0.241187	1.39405
ENSMUSG00000034501	Pcnx4	67708	pecanex homolog 4	-2.84227	3.50813	5.21063	0.0325612	0.241187	-7.17149
ENSMUSG00000058006	Mdn1	100019	midasin AAA ATPase 1	0.54882	7.10967	5.20885	0.0325879	0.241187	1.46289
ENSMUSG00000011254	Thg1l	66628	tRNA-histidine guanylyltransferase 1-like (S. cerevisiae)	3.15148	2.66721	5.20861	0.0325915	0.241187	8.88564
ENSMUSG00000035953	Pip4p1	219024	phosphatidylinositol-4,5-bisphosphate 4-phosphatase 1	0.54267	6.78311	5.20723	0.0326122	0.241187	1.45667
ENSMUSG00000052631	Sh2d6	71130	SH2 domain containing 6	2.62683	1.86097	5.20717	0.0326131	0.241187	6.17667
ENSMUSG00000027404	Snrpb	20638	small nuclear ribonucleoprotein B	-1.20261	3.74365	5.20379	0.032664	0.241369	-2.30156
ENSMUSG00000006728	Cdk4	12567	cyclin-dependent kinase 4	-0.85961	5.73917	5.20316	0.0326735	0.241369	-1.81455
ENSMUSG00000017188	Coa3	52469	cytochrome C oxidase assembly factor 3	2.26162	2.53347	5.20183	0.0326935	0.241385	4.7953
ENSMUSG00000024395	Lims2	225341	LIM and senescent cell antigen like domains 2	5.77718	-0.993349	5.31277	0.0327357	0.241522	54.8408
ENSMUSG00000028850	Gpatch3	242691	G patch domain containing 3	1.96161	2.81023	5.19823	0.0327478	0.241522	3.89495
ENSMUSG00000042759	Apobr	171504	apolipoprotein B receptor	0.855854	5.89971	5.1946	0.0328028	0.241618	1.80983
ENSMUSG00000048915	Efna5	13640	ephrin A5	-6.32479	-0.736357	5.3056	0.0328401	0.241618	-80.1586
ENSMUSG00000014907	Naf1	234344	nuclear assembly factor 1 ribonucleoprotein	-1.74764	2.91263	5.19111	0.0328557	0.241618	-3.35808
ENSMUSG00000001157	Gmcl1	23885	germ cell-less, spermatogenesis associated 1	-1.5531	4.04593	5.19066	0.0328624	0.241618	-2.93447
ENSMUSG00000029343	Crybb1	12960	crystallin, beta B1	-0.840106	5.77004	5.19065	0.0328625	0.241618	-1.79018
ENSMUSG00000027849	Syt6	54524	synaptotagmin VI	-4.93957	0.677288	5.26166	0.0328682	0.241618	-30.6872
ENSMUSG00000033352	Map2k4	26398	mitogen-activated protein kinase kinase 4	-0.86344	5.95297	5.18563	0.0329388	0.241801	-1.81937
ENSMUSG00000034570	Inpp5j	170835	inositol polyphosphate 5-phosphatase J	4.40525	-0.161613	5.29782	0.0329539	0.241801	21.1891
ENSMUSG00000039483	Asb6	72323	ankyrin repeat and SOCS box-containing 6	-1.5863	3.52946	5.18336	0.0329733	0.241801	-3.00278
ENSMUSG00000086894	Gm15708	100504231	predicted gene 15708	-2.85796	2.65623	5.18284	0.0329813	0.241801	-7.2499
ENSMUSG00000048644	Ctxn1	330695	cortexin 1	4.684	1.17179	5.18275	0.0329826	0.241801	25.7054
ENSMUSG00000032754	Slc8b1	170756	solute carrier family 8 (sodium/lithium/calcium exchanger), member B1	-0.982498	4.80356	5.1768	0.0330734	0.242335	-1.97588
ENSMUSG00000028413	B4galt1	14595	UDP-Gal:betaGlcNAc beta 1,4- galactosyltransferase, polypeptide 1	0.339183	8.29541	5.17291	0.0331328	0.242355	1.26504
ENSMUSG00000020308	Tpgs1	110012	tubulin polyglutamylase complex subunit 1	-2.39306	2.33544	5.17261	0.0331375	0.242355	-5.25269
ENSMUSG00000027678	Ncoa3	17979	nuclear receptor coactivator 3	0.405224	8.53874	5.17155	0.0331536	0.242355	1.32429
ENSMUSG00000032512	Wdr48	67561	WD repeat domain 48	-0.913438	5.35604	5.17141	0.0331558	0.242355	-1.88353
ENSMUSG00000071203	Naip5	17951	NLR family, apoptosis inhibitory protein 5	0.633639	7.57857	5.17075	0.0331659	0.242355	1.55147
ENSMUSG00000036564	Ndrg4	234593	N-myc downstream regulated gene 4	-5.36676	1.3412	5.16946	0.0331857	0.242369	-41.2624
ENSMUSG00000018921	Pelp1	75273	proline, glutamic acid and leucine rich protein 1	1.84447	3.74064	5.16777	0.0332117	0.242427	3.59121
ENSMUSG00000056116	H2-T22	15039	histocompatibility 2, T region locus 22	1.03034	4.48909	5.16383	0.0332721	0.24272	2.04251
ENSMUSG00000007589	Tinf2	28113	Terf1 (TRF1)-interacting nuclear factor 2	1.40538	3.91472	5.16282	0.0332877	0.24272	2.64888
ENSMUSG00000034105	Tldc1	74347	TBC/LysM associated domain containing 1	-5.21643	0.449982	5.22837	0.0333652	0.243066	-37.1794
ENSMUSG00000028164	Manba	110173	mannosidase, beta A, lysosomal	0.795155	6.06265	5.1574	0.0333712	0.243066	1.73526
ENSMUSG00000059811	Atl2	56298	atlastin GTPase 2	1.37439	5.70183	5.15249	0.0334471	0.243339	2.59258
ENSMUSG00000023806	Rsph3b	100037282	radial spoke 3B homolog (Chlamydomonas)	2.19327	3.37741	5.1514	0.033464	0.243339	4.57341
ENSMUSG00000025475	Adgra1	52389	adhesion G protein-coupled receptor A1	4.98227	-0.0531207	5.26289	0.0334698	0.243339	31.6092
ENSMUSG00000062901	Klhl24	75785	kelch-like 24	0.433716	8.0862	5.14876	0.0335048	0.243339	1.35071
ENSMUSG00000027737	Slc7a11	26570	solute carrier family 7 (cationic amino acid transporter, y+ system), member 11	-1.12533	4.84111	5.14871	0.0335056	0.243339	-2.18151
ENSMUSG00000021719	Rgs7bp	52882	regulator of G-protein signalling 7 binding protein	-1.79626	3.29987	5.14743	0.0335254	0.243339	-3.4732
ENSMUSG00000028514	Usp24	329908	ubiquitin specific peptidase 24	-0.32336	8.86306	5.14588	0.0335495	0.243339	-1.25124
ENSMUSG00000016206	H2-M3	14991	histocompatibility 2, M region locus 3	0.772039	6.15751	5.14566	0.0335528	0.243339	1.70768
ENSMUSG00000022771	Ppil2	66053	peptidylprolyl isomerase (cyclophilin)-like 2	-0.582033	6.18817	5.14025	0.033637	0.243818	-1.49696
ENSMUSG00000002608	Ccdc97	52132	coiled-coil domain containing 97	0.695659	6.39145	5.13635	0.0336978	0.244128	1.61962
ENSMUSG00000054626	Xlr	22441	X-linked lymphocyte-regulated	-1.10653	4.08915	5.13179	0.0337689	0.244512	-2.15327
ENSMUSG00000022822	Abcc5	27416	ATP-binding cassette, sub-family C (CFTR/MRP), member 5	-0.558675	7.49614	5.12754	0.0338354	0.244787	-1.47292
ENSMUSG00000030795	Fus	233908	fused in sarcoma	-0.482985	8.89949	5.12456	0.0338822	0.244787	-1.39763
ENSMUSG00000033703	Fuk	234730	fucokinase	-2.74243	2.16127	5.12435	0.0338856	0.244787	-6.69198
ENSMUSG00000031245	Hmgn5	50887	high-mobility group nucleosome binding domain 5	1.7951	3.95402	5.12267	0.033912	0.244787	3.47039
ENSMUSG00000059897	Zfp930	234358	zinc finger protein 930	-3.12097	2.25774	5.12232	0.0339174	0.244787	-8.69972
ENSMUSG00000035944	Ttc38	239570	tetratricopeptide repeat domain 38	-1.47584	3.60123	5.12157	0.0339292	0.244787	-2.78146
ENSMUSG00000021906	Oxnad1	218885	oxidoreductase NAD-binding domain containing 1	-2.37661	2.92641	5.15314	0.0339516	0.244787	-5.19314
ENSMUSG00000029228	Lnx1	16924	ligand of numb-protein X 1	-5.77549	-0.220448	5.2308	0.0339519	0.244787	-54.7768
ENSMUSG00000027808	Serp1	28146	stress-associated endoplasmic reticulum protein 1	0.476177	7.64681	5.11776	0.0339892	0.244925	1.39105
ENSMUSG00000020128	Vps54	245944	VPS54 GARP complex subunit	-0.545344	7.77896	5.11331	0.0340593	0.2453	-1.45937
ENSMUSG00000097195	Snhg5	72655	small nucleolar RNA host gene 5	1.01084	5.13497	5.10846	0.0341359	0.245539	2.01508
ENSMUSG00000002496	Tsc2	22084	tuberous sclerosis 2	-0.989275	5.98341	5.10816	0.0341407	0.245539	-1.98519
ENSMUSG00000048758	Rpl29	19944	ribosomal protein L29	-0.636416	7.03078	5.10714	0.0341569	0.245539	-1.55446
ENSMUSG00000014599	Csf1	12977	colony stimulating factor 1 (macrophage)	0.861104	5.62848	5.10661	0.0341653	0.245539	1.81643
ENSMUSG00000019951	Uhrf1bp1l	75089	UHRF1 (ICBP90) binding protein 1-like	0.82256	6.30013	5.10268	0.0342277	0.245857	1.76854
ENSMUSG00000025255	Zfhx4	80892	zinc finger homeodomain 4	-6.13307	-0.196853	5.16438	0.0343448	0.246567	-70.1838
ENSMUSG00000078588	Ccdc24	381546	coiled-coil domain containing 24	5.17976	1.02175	5.09282	0.0343845	0.246721	36.2464
ENSMUSG00000001098	Kctd10	330171	potassium channel tetramerisation domain containing 10	-0.909149	5.76587	5.09152	0.0344052	0.246738	-1.87794
ENSMUSG00000050565	Tor1aip2	240832	torsin A interacting protein 2	-0.476141	7.50927	5.08734	0.0344721	0.247087	-1.39102
ENSMUSG00000003283	Hck	15162	hemopoietic cell kinase	-0.732467	6.3861	5.08392	0.0345268	0.247248	-1.66148
ENSMUSG00000078201	Tmem203	227615	transmembrane protein 203	-2.08989	2.74678	5.08278	0.0345451	0.247248	-4.25716
ENSMUSG00000027366	Sppl2a	66552	signal peptide peptidase like 2A	0.381998	9.11115	5.08251	0.0345495	0.247248	1.30315
ENSMUSG00000050944	Efcab5	319634	EF-hand calcium binding domain 5	5.24733	0.778485	5.23376	0.0346033	0.24744	37.9843
ENSMUSG00000004018	Fancl	67030	Fanconi anemia, complementation group L	2.26166	3.5209	5.07855	0.034613	0.24744	4.79542
ENSMUSG00000036867	Smad6	17130	SMAD family member 6	-5.22166	0.32574	5.07657	0.0346449	0.247452	-37.3143
ENSMUSG00000036894	Rap2b	74012	RAP2B, member of RAS oncogene family	1.08616	5.72533	5.07575	0.0346582	0.247452	2.12308
ENSMUSG00000072621	Slfn10-ps	237887	schlafen 10, pseudogene	3.66051	1.7961	5.07488	0.0346721	0.247452	12.6451
ENSMUSG00000029009	Mthfr	17769	methylenetetrahydrofolate reductase	-1.06095	4.75293	5.0739	0.034688	0.247452	-2.0863
ENSMUSG00000055980	Irs1	16367	insulin receptor substrate 1	-6.43773	0.278148	5.13144	0.0348618	0.248561	-86.6861
ENSMUSG00000060424	Pantr1	66297	POU domain, class 3, transcription factor 3 adjacent noncoding transcript 1	-7.05015	-0.846665	5.16973	0.0348916	0.248587	-132.528
ENSMUSG00000026563	Tada1	27878	transcriptional adaptor 1	1.02977	5.4944	5.06057	0.0349036	0.248587	2.0417
ENSMUSG00000047040	Prr15l	217138	proline rich 15-like	-6.12713	-0.450448	5.16651	0.034942	0.248587	-69.8957
ENSMUSG00000047797	Gjb1	14618	gap junction protein, beta 1	5.60447	-0.771196	5.21135	0.0349469	0.248587	48.6534
ENSMUSG00000030772	Dkk3	50781	dickkopf WNT signaling pathway inhibitor 3	4.51613	1.45044	5.08937	0.0349599	0.248587	22.8818
ENSMUSG00000024959	Bad	12015	BCL2-associated agonist of cell death	1.69895	3.48569	5.05558	0.0349847	0.248587	3.24664
ENSMUSG00000035051	Dhx57	106794	DEAH (Asp-Glu-Ala-Asp/His) box polypeptide 57	-0.647756	6.37182	5.05471	0.0349987	0.248587	-1.56673
ENSMUSG00000062480	Acat3	224530	acetyl-Coenzyme A acetyltransferase 3	3.43179	0.693174	5.05331	0.0350216	0.248587	10.7913
ENSMUSG00000027263	Tubgcp4	51885	tubulin, gamma complex associated protein 4	1.17689	6.85271	5.0492	0.0350886	0.248587	2.26088
ENSMUSG00000037286	Stag1	20842	stromal antigen 1	0.36362	8.08028	5.04869	0.0350969	0.248587	1.28665
ENSMUSG00000089722	Cd300ld5	100043125	CD300 molecule like family member D5	-7.39544	-0.546737	5.3093	0.0351221	0.248587	-168.364
ENSMUSG00000031530	Dusp4	319520	dual specificity phosphatase 4	-6.48668	0.137133	5.11469	0.0351281	0.248587	-89.678
ENSMUSG00000026098	Pms1	227099	PMS1 homolog 1, mismatch repair system component	-1.37113	3.60414	5.04512	0.0351553	0.248587	-2.58673
ENSMUSG00000014504	Srp19	66384	signal recognition particle 19	-0.913901	4.84697	5.04407	0.0351725	0.248587	-1.88413
ENSMUSG00000085826	Gm15638	100503378	predicted gene 15638	-6.02143	-0.848748	5.15077	0.0351893	0.248587	-64.9577
ENSMUSG00000089832	Shkbp1	192192	Sh3kbp1 binding protein 1	1.29868	3.94499	5.04278	0.0351936	0.248587	2.46004
ENSMUSG00000020898	Ctc1	68964	CTS telomere maintenance complex component 1	-0.878076	6.08314	5.042	0.0352063	0.248587	-1.83792
ENSMUSG00000056716	Gm5420	432436	predicted gene 5420	4.18824	1.12881	5.04168	0.0352116	0.248587	18.23
ENSMUSG00000051285	Pcmtd1	319263	protein-L-isoaspartate (D-aspartate) O-methyltransferase domain containing 1	0.677469	7.5738	5.04108	0.0352215	0.248587	1.59933
ENSMUSG00000041734	Kirrel	170643	kirre like nephrin family adhesion molecule 1	-6.31625	-0.664389	5.14796	0.0352337	0.248587	-79.6858
ENSMUSG00000022160	Mettl3	56335	methyltransferase like 3	1.70849	5.05539	5.03558	0.0353118	0.248792	3.26819
ENSMUSG00000015476	Prrt1	260297	proline-rich transmembrane protein 1	-4.88073	-0.198912	5.03557	0.0353119	0.248792	-29.4609
ENSMUSG00000014503	Pkd2l2	53871	polycystic kidney disease 2-like 2	2.13384	2.61513	5.0352	0.035318	0.248792	4.38884
ENSMUSG00000022818	Cyp2ab1	224044	cytochrome P450, family 2, subfamily ab, polypeptide 1	4.10376	2.15444	5.23458	0.0353735	0.248978	17.1931
ENSMUSG00000025825	Iscu	66383	iron-sulfur cluster assembly enzyme	-0.865088	5.70851	5.03136	0.0353813	0.248978	-1.82145
ENSMUSG00000060090	Rp2	19889	retinitis pigmentosa 2 homolog	0.406987	8.16369	5.02962	0.0354099	0.24905	1.32591
ENSMUSG00000033458	Fan1	330554	FANCD2/FANCI-associated nuclease 1	2.99947	2.91086	5.02452	0.0354941	0.249436	7.99707
ENSMUSG00000015090	Ptgds	19215	prostaglandin D2 synthase (brain)	2.0362	4.52635	5.02369	0.0355078	0.249436	4.10164
ENSMUSG00000028062	Lamtor2	83409	late endosomal/lysosomal adaptor, MAPK and MTOR activator 2	-1.59863	3.88289	5.02099	0.0355526	0.249436	-3.02855
ENSMUSG00000017843	Ppp2r5c	26931	protein phosphatase 2, regulatory subunit B', gamma	0.719538	6.53415	5.0192	0.0355823	0.249436	1.64665
ENSMUSG00000029797	Sspo	243369	SCO-spondin	4.77258	-0.132027	5.12494	0.0355996	0.249436	27.3331
ENSMUSG00000033423	Eri3	140546	exoribonuclease 3	-1.20498	4.4926	5.01485	0.0356544	0.249436	-2.30534
ENSMUSG00000002799	Jag2	16450	jagged 2	-3.09255	1.85007	5.01481	0.0356551	0.249436	-8.53001
ENSMUSG00000029455	Aldh2	11669	aldehyde dehydrogenase 2, mitochondrial	1.21738	4.79015	5.01294	0.0356862	0.249436	2.32524
ENSMUSG00000029053	Prkcz	18762	protein kinase C, zeta	2.5454	2.28268	5.01247	0.0356941	0.249436	5.83769
ENSMUSG00000022477	Aco2	11429	aconitase 2, mitochondrial	0.558984	6.28634	5.01241	0.035695	0.249436	1.47323
ENSMUSG00000026858	Miga2	108958	mitoguardin 2	-1.97361	2.89134	5.01231	0.0356966	0.249436	-3.9275
ENSMUSG00000002996	Hbp1	73389	high mobility group box transcription factor 1	0.463419	7.20364	5.01018	0.0357321	0.249436	1.37881
ENSMUSG00000048647	Exd1	241624	exonuclease 3'-5' domain containing 1	3.05407	1.29883	5.00925	0.0357476	0.249436	8.30554
ENSMUSG00000000486	2019-09-01	54204	septin 1	3.88584	1.0937	5.03977	0.0357677	0.249436	14.7827
ENSMUSG00000028028	Alpk1	71481	alpha-kinase 1	0.874207	5.63316	5.0076	0.0357752	0.249436	1.833
ENSMUSG00000089798	1700028K03Rik	76421	RIKEN cDNA 1700028K03 gene	1.95395	3.27568	5.00721	0.0357816	0.249436	3.87433
ENSMUSG00000075592	Nynrin	277154	NYN domain and retroviral integrase containing	3.04777	3.22275	5.00603	0.0358014	0.249436	8.26935
ENSMUSG00000002625	Akap8l	54194	A kinase (PRKA) anchor protein 8-like	0.858916	5.12708	5.00539	0.0358121	0.249436	1.81368
ENSMUSG00000076433	Cep295nl	58251	CEP295 N-terminal like	-2.40769	2.30802	5.00437	0.0358291	0.249436	-5.30622
ENSMUSG00000013701	Timm23	53600	translocase of inner mitochondrial membrane 23	-1.67865	4.04958	5.00311	0.0358502	0.249436	-3.20129
ENSMUSG00000005089	Slc1a2	20511	solute carrier family 1 (glial high affinity glutamate transporter), member 2	1.14794	6.87949	5.00192	0.0358701	0.249436	2.21598
ENSMUSG00000014601	Strip1	229707	striatin interacting protein 1	-1.22336	4.57565	5.00185	0.0358712	0.249436	-2.3349
ENSMUSG00000035745	Grin3b	170483	glutamate receptor, ionotropic, NMDA3B	-5.71572	-0.365822	5.10105	0.0359838	0.25009	-52.5536
ENSMUSG00000028801	Stpg1	78806	sperm tail PG rich repeat containing 1	-5.27361	-0.922176	5.06028	0.0360089	0.250136	-38.6826
ENSMUSG00000048794	Cfap100	243538	cilia and flagella associated protein 100	-5.60175	-1.04839	5.05681	0.036066	0.250326	-48.5617
ENSMUSG00000022023	Wbp4	22380	WW domain binding protein 4	0.834592	5.57513	4.98867	0.0360927	0.250326	1.78335
ENSMUSG00000036983	Tfb1m	224481	transcription factor B1, mitochondrial	2.82925	2.15429	4.98817	0.036101	0.250326	7.10705
ENSMUSG00000010057	Nprl2	56032	NPR2 like, GATOR1 complex subunit	2.74546	2.33032	4.98643	0.0361303	0.250326	6.70602
ENSMUSG00000031075	Ano1	101772	anoctamin 1, calcium activated chloride channel	-7.00071	-0.492488	5.09038	0.036157	0.250326	-128.063
ENSMUSG00000032419	Tbx18	76365	T-box18	6.17388	-0.617919	5.13389	0.0361647	0.250326	72.1979
ENSMUSG00000042496	Prdm10	382066	PR domain containing 10	-0.978045	5.03187	4.98432	0.0361661	0.250326	-1.96979
ENSMUSG00000040451	Sgms1	208449	sphingomyelin synthase 1	0.689792	5.86962	4.98167	0.0362108	0.25039	1.61305
ENSMUSG00000049493	Pls1	102502	plastin 1 (I-isoform)	4.66677	-0.721189	5.08698	0.0362124	0.25039	25.4003
ENSMUSG00000063919	Srrm4	68955	serine/arginine repetitive matrix 4	4.9874	-0.755086	5.08483	0.0362473	0.250504	31.7217
ENSMUSG00000036158	Prickle1	106042	prickle planar cell polarity protein 1	-2.36815	2.48589	4.97777	0.0362769	0.250579	-5.16278
ENSMUSG00000071632	2510002D24Rik	72307	RIKEN cDNA 2510002D24 gene	-2.87117	1.66704	4.97468	0.0363293	0.250805	-7.31657
ENSMUSG00000035158	Mitf	17342	melanogenesis associated transcription factor	0.91528	5.78063	4.97283	0.0363607	0.250805	1.88594
ENSMUSG00000003955	Fam162a	70186	family with sequence similarity 162, member A	1.751	3.05266	4.97256	0.0363653	0.250805	3.36591
ENSMUSG00000037801	Iqch	78250	IQ motif containing H	-4.12915	2.9743	4.97043	0.0364015	0.25085	-17.4984
ENSMUSG00000027282	Mtch2	56428	mitochondrial carrier 2	-1.06438	5.19646	4.96999	0.0364089	0.25085	-2.09128
ENSMUSG00000052234	Epx	13861	eosinophil peroxidase	5.92879	-1.3967	5.28503	0.036491	0.251143	60.9178
ENSMUSG00000029521	Chek2	50883	checkpoint kinase 2	1.83878	3.66182	4.96513	0.0364918	0.251143	3.57706
ENSMUSG00000025795	Rassf3	192678	Ras association (RalGDS/AF-6) domain family member 3	0.569553	6.07733	4.9641	0.0365093	0.251143	1.48406
ENSMUSG00000071226	Cecr2	330409	CECR2, histone acetyl-lysine reader	-3.62908	1.3478	4.99416	0.0365291	0.251143	-12.3726
ENSMUSG00000030223	Ptpro	19277	protein tyrosine phosphatase, receptor type, O	0.683436	6.65804	4.96204	0.0365445	0.251143	1.60596
ENSMUSG00000046079	Lrrc8d	231549	leucine rich repeat containing 8D	0.472484	6.68984	4.96054	0.0365701	0.251192	1.3875
ENSMUSG00000024079	Eif2ak2	19106	eukaryotic translation initiation factor 2-alpha kinase 2	-0.538772	6.73345	4.95858	0.0366038	0.25122	-1.45274
ENSMUSG00000053565	Eif3k	73830	eukaryotic translation initiation factor 3, subunit K	-0.885211	5.05644	4.95732	0.0366252	0.25122	-1.84703
ENSMUSG00000056222	Spock1	20745	sparc/osteonectin, cwcv and kazal-like domains proteoglycan 1	-6.99877	-0.612423	5.06152	0.03663	0.25122	-127.891
ENSMUSG00000020697	Lig3	16882	ligase III, DNA, ATP-dependent	1.1405	4.52857	4.95225	0.0367122	0.251608	2.20457
ENSMUSG00000037151	Lrrc20	216011	leucine rich repeat containing 20	-3.41843	1.54445	4.95019	0.0367477	0.251608	-10.6918
ENSMUSG00000055745	Rtl6	223732	retrotransposon Gag like 6	2.30082	2.63691	4.94939	0.0367615	0.251608	4.92737
ENSMUSG00000039741	Bahcc1	268515	BAH domain and coiled-coil containing 1	-1.70624	3.63088	4.94913	0.0367659	0.251608	-3.26309
ENSMUSG00000041445	Mmrn2	105450	multimerin 2	-6.59489	-0.751443	5.01389	0.0367798	0.251608	-96.6627
ENSMUSG00000026430	Rassf5	54354	Ras association (RalGDS/AF-6) domain family member 5	0.676235	6.37131	4.94522	0.0368332	0.251846	1.59796
ENSMUSG00000022415	Syngr1	20972	synaptogyrin 1	-1.10457	5.08529	4.94407	0.0368531	0.251854	-2.15035
ENSMUSG00000006463	Zdhhc24	70605	zinc finger, DHHC domain containing 24	-2.4573	5.72563	4.94101	0.036906	0.252088	-5.49187
ENSMUSG00000034987	Hrh2	15466	histamine receptor H2	1.48216	4.08551	4.93732	0.0369697	0.252396	2.79367
ENSMUSG00000028546	Elavl4	15572	ELAV like RNA binding protein 4	-3.13043	2.23452	4.93576	0.0369968	0.252453	-8.75696
ENSMUSG00000072980	Oip5	70645	Opa interacting protein 5	-5.08342	-0.0326473	4.9572	0.0371596	0.253436	-33.9049
ENSMUSG00000037709	Fam13a	58909	family with sequence similarity 13, member A	2.72776	2.83661	4.9253	0.0371786	0.253437	6.62425
ENSMUSG00000028527	Ak4	11639	adenylate kinase 4	4.10529	1.11588	4.95413	0.0372126	0.253541	17.2113
ENSMUSG00000037568	Vash2	226841	vasohibin 2	-5.00564	1.04126	4.98386	0.0372889	0.253933	-32.1254
ENSMUSG00000029616	Erp29	67397	endoplasmic reticulum protein 29	0.498485	7.21882	4.91747	0.0373152	0.253984	1.41273
ENSMUSG00000044018	Mrpl50	28028	mitochondrial ribosomal protein L50	1.76292	4.14715	4.91618	0.0373378	0.25401	3.39385
ENSMUSG00000037664	Cdkn1c	12577	cyclin-dependent kinase inhibitor 1C (P57)	2.49337	2.61162	4.91435	0.03737	0.254101	5.63093
ENSMUSG00000022414	Tab1	66513	TGF-beta activated kinase 1/MAP3K7 binding protein 1	2.76181	3.03335	4.91255	0.0374015	0.254187	6.78246
ENSMUSG00000003135	Cnot11	52846	CCR4-NOT transcription complex, subunit 11	1.09245	4.85789	4.91141	0.0374215	0.254195	2.13236
ENSMUSG00000063273	Naa15	74838	N(alpha)-acetyltransferase 15, NatA auxiliary subunit	-0.728007	6.58939	4.90938	0.0374571	0.254206	-1.65635
ENSMUSG00000050017	Pitpnb	56305	phosphatidylinositol transfer protein, beta	-0.850674	5.15693	4.90917	0.0374607	0.254206	-1.80334
ENSMUSG00000038168	P3h2	210530	prolyl 3-hydroxylase 2	-0.68628	7.47087	4.90591	0.0375181	0.254467	-1.60913
ENSMUSG00000020102	Slc16a7	20503	solute carrier family 16 (monocarboxylic acid transporters), member 7	-0.890567	6.10512	4.90268	0.037575	0.254559	-1.8539
ENSMUSG00000031451	Gas6	14456	growth arrest specific 6	-0.801966	6.97658	4.90259	0.0375766	0.254559	-1.74348
ENSMUSG00000038776	Ephx1	13849	epoxide hydrolase 1, microsomal	-1.88584	3.88585	4.90093	0.0376058	0.254559	-3.69569
ENSMUSG00000004567	Mcoln1	94178	mucolipin 1	-1.0988	5.02831	4.90063	0.0376112	0.254559	-2.14176
ENSMUSG00000019808	Adat2	66757	adenosine deaminase, tRNA-specific 2	3.33257	1.32145	4.8998	0.0376259	0.254559	10.074
ENSMUSG00000047884	Klk9	101533	kallikrein related-peptidase 9	-3.55674	0.794743	4.9241	0.0377347	0.255055	-11.7675
ENSMUSG00000053647	Gper1	76854	G protein-coupled estrogen receptor 1	-5.42223	-0.900448	4.95682	0.037754	0.255055	-42.8799
[truncated: 11,506 more rows]
